# Supplementary material for: Milk Exosomes Transfer Oligosaccharides into Macrophages to Modulate Immunity and Attenuate Adherent-Invasive E. coli (AIEC) Infection
Source: MDPI journal article supplement (doi:10.3390/nu13093198), 2021-09-14
Supplement: s1 [file s1]

# **Milk exosomes deliver oligosaccharides into macrophages to modulate immunity and attenuate adherent-invasive *E. coli* (AIEC) infection**

YingYing He<sup>2</sup>, Zhicheng He<sup>1,3</sup>, Serena Leone<sup>4</sup>, Shubai Liu<sup>1,\*</sup>

<sup>1</sup> State Key Laboratory of Phytochemistry and Plant Resources in West China, Kunming Institute of Botany, Chinese Academy of Sciences, Kunming, 650201 Yunnan, P. R. China;

<sup>2</sup> School of Chemical Science & Technology, Yunnan University, Kunming, Yunnan 650091, China;

<sup>3</sup> University of Chinese Academy of Sciences, Beijing 100049, China.

<sup>4</sup> Department of Chemical Sciences, University of Naples 'Federico II', Napoli, Italy.

## **\*Corresponding author:**

Dr. Shubai Liu, State Key Laboratory of Phytochemistry and Plant Resources in West China, Kunming Institute of Botany, the Chinese Academy of Sciences, #132 Lanhei Road, Panlong District, Kunming, Yunnan 650201, China.

E-mail: [liushubai@mail.kib.ac.cn](mailto:liushubai@mail.kib.ac.cn)

## Supplementary Information

### Supplementary Figure Legends

**Figure. S1. The workflow of human milk exosome preparation and isolation.**

**Figure.S2. Normalization of THP-1 differentiated macrophages.** The THP-1 differentiated macrophages by PMA (200 nM) was stained cellular plasma with CM-Dil dynamic tracking by fluorescence microscopy (A). Characterization of TLR4 expression in THP-1 differentiated macrophages (B).

**Figure. S3 Calibration of fluorescent intensity and the 2-AB labelled 2-FL concentration.** The standard curve of fluorescent intensity and 2-AB labelled 2-FL concentration in vitro assay system (A). The 2-AB's fluorescence intensity of 2-FL was stable over 64 hours in buffer (B).

**Table S1.** The significantly regulated genes by colostrum exosome capsulated oligosaccharides in macrophages.

**Table. S2.** Enrichment results of top ten Process Networks regulated by colostrum exosome capsulated oligosaccharides.

**Table. S3.** Enrichment results of top ten Pathway Maps regulated by colostrum exosome capsulated oligosaccharides.

Sup. Fig 1

## Human Milk Exosome (HME) characterization and isolation workflow

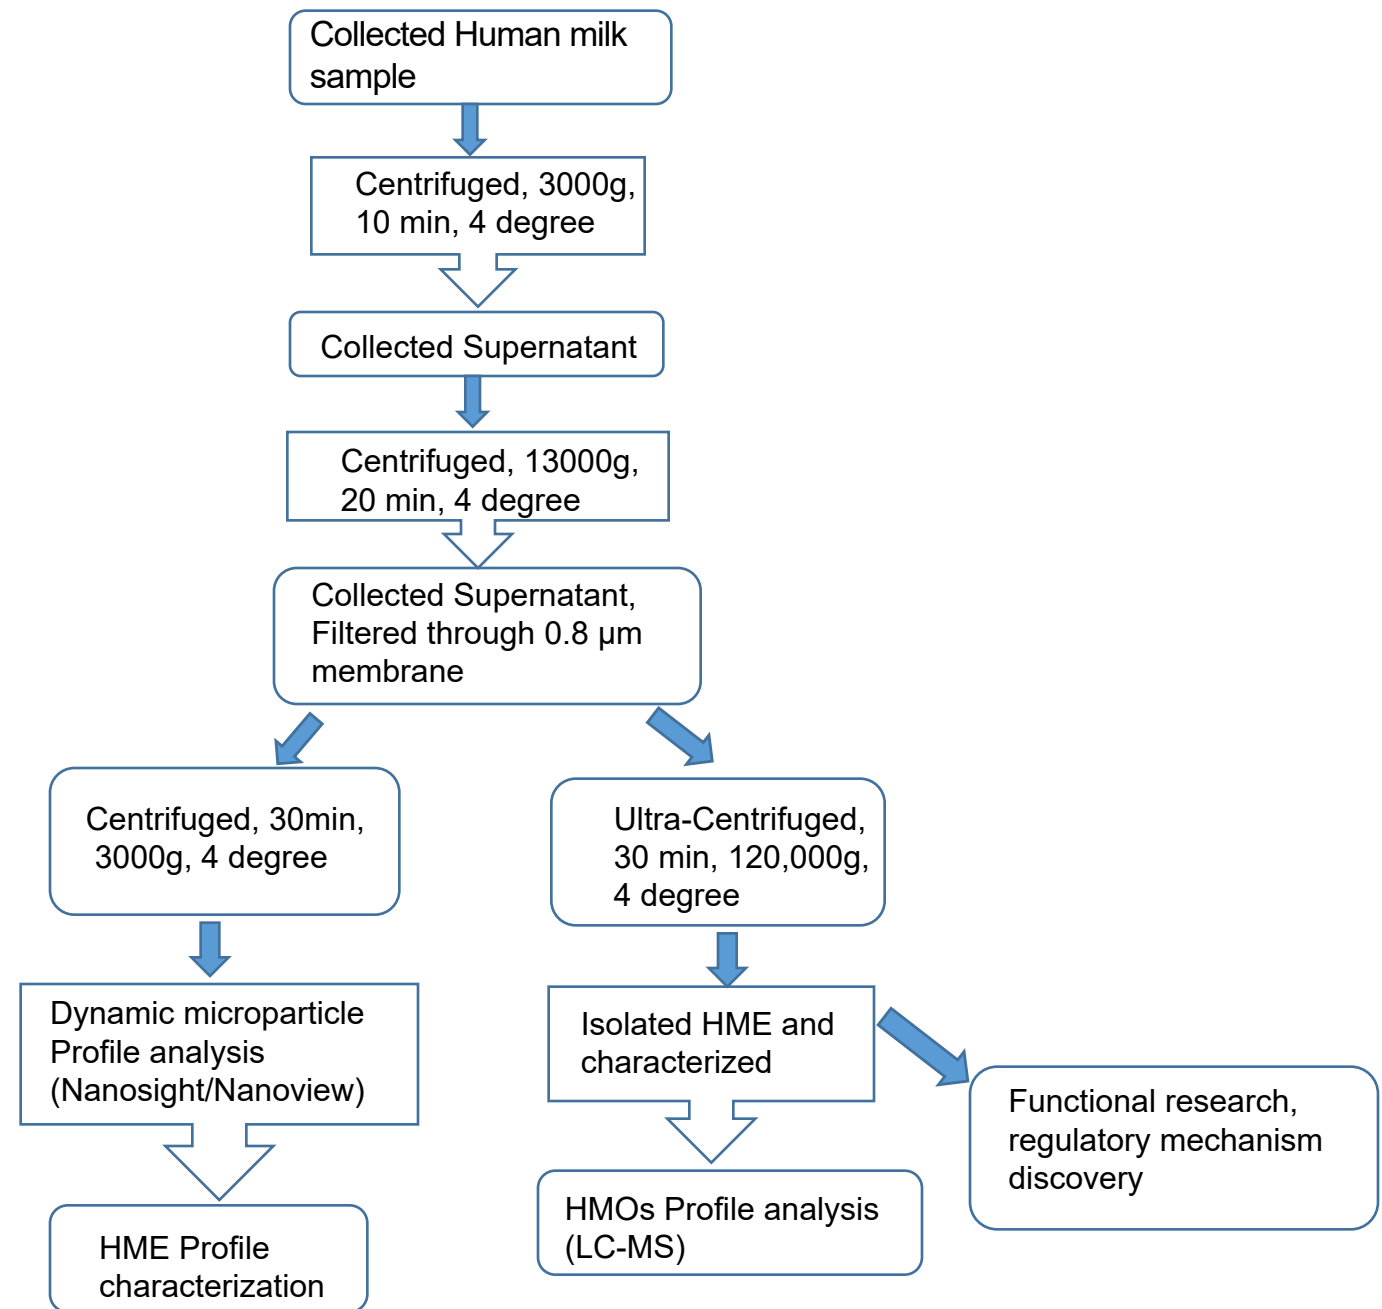

A

Macrophage differentiated from THP-1 induced by PMA

Bright

CM-Dil (plasma)

Hochest

200 nM PMA (24h)

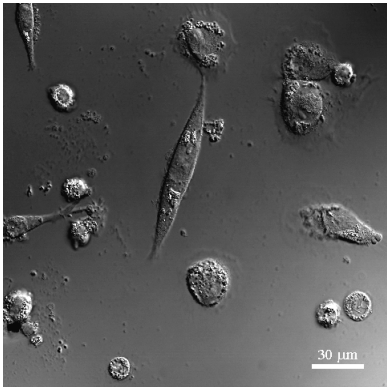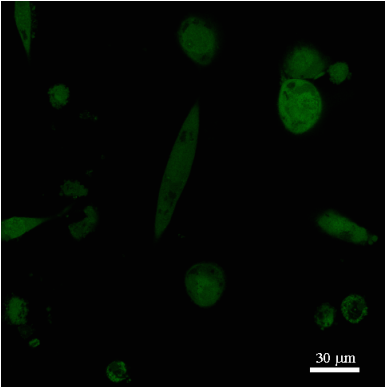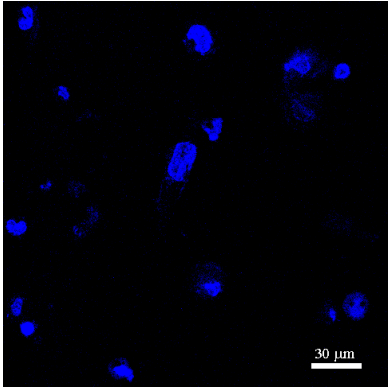

B

TLR4

Hochest (Merge)

THP-1

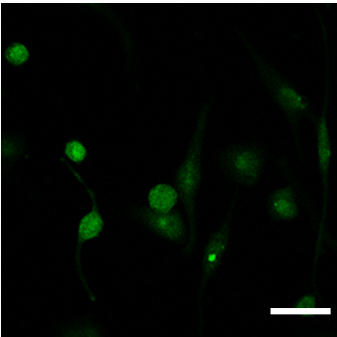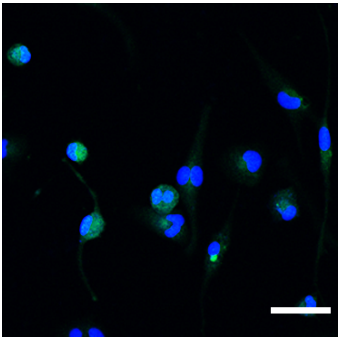

THP-1 Derived Macrophages

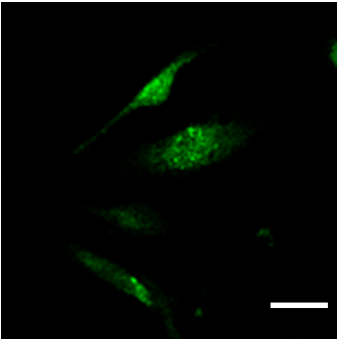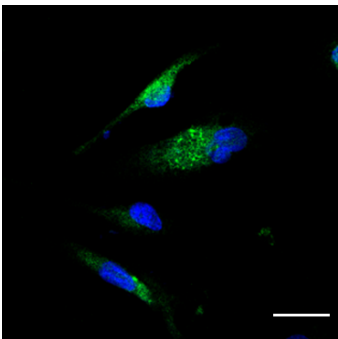

A

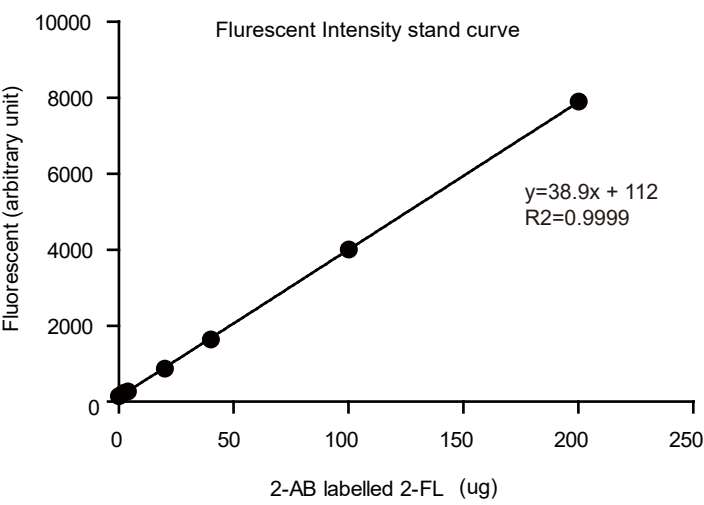

B

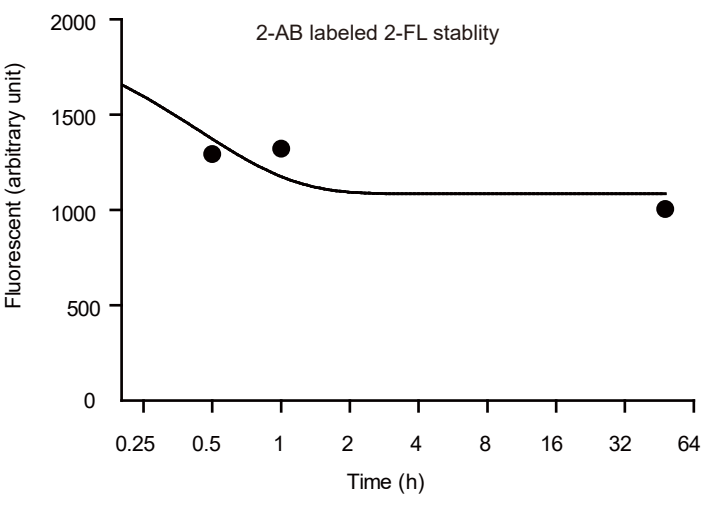

**Table S1. The significantly regulated genes by colostrum exosome capsulated oligosaccharides in macrophages.**

| Gene Symbol    | Fold Change | CTRL Avg (log2) | HME0 Avg (log2) | P-val    | FDR P-val | Description                                                                                                                  |
|----------------|-------------|-----------------|-----------------|----------|-----------|------------------------------------------------------------------------------------------------------------------------------|
| A2M            | -3.01       | -1.31           | 0.28            | 5.24E-06 | 0.0002    | alpha-2-macroglobulin                                                                                                        |
| AAMP           | -3.09       | -1.28           | 0.35            | 0.0002   | 0.0007    | angio-associated migratory cell protein                                                                                      |
| AASDHPPT       | -3.12       | -1.37           | 0.27            | 3.35E-05 | 0.0003    | aminoadipate-semialdehyde dehydrogenase-phosphopantetheinyl transferase                                                      |
| ABCB8          | -3.05       | -1.36           | 0.25            | 2.67E-05 | 0.0003    | ATP binding cassette subfamily B member 8                                                                                    |
| ABCC10         | -3.12       | -1.38           | 0.26            | 5.16E-05 | 0.0004    | ATP binding cassette subfamily C member 10                                                                                   |
| ABCC6P2        | 3.03        | 0.2             | -1.4            | 1.01E-05 | 0.0002    | ATP binding cassette subfamily C member 6 pseudogene 2                                                                       |
| ABCG5          | -3.09       | -1.28           | 0.35            | 7.65E-06 | 0.0002    | ATP binding cassette subfamily G member 5                                                                                    |
| ABCG8          | -3.13       | -1.3            | 0.35            | 1.12E-05 | 0.0002    | ATP binding cassette subfamily G member 8                                                                                    |
| ABHD17AP1      | 3.12        | 0.26            | -1.38           | 2.87E-05 | 0.0003    | abhydrolase domain containing 17A pseudogene 1                                                                               |
| ABHD17AP1      | 3.12        | 0.26            | -1.38           | 2.87E-05 | 0.0003    | abhydrolase domain containing 17A pseudogene 1                                                                               |
| ABHD17C        | 3.12        | 0.26            | -1.38           | 5.70E-06 | 0.0002    | abhydrolase domain containing 17C                                                                                            |
| ABO            | -3.03       | -1.31           | 0.29            | 9.58E-05 | 0.0005    | ABO blood group (transferase A, alpha 1-3-N-acetylgalactosaminyltransferase; transferase B, alpha 1-3-galactosyltransferase) |
| ABRA           | -3.06       | -1.33           | 0.28            | 0.0001   | 0.0006    | actin binding Rho activating protein                                                                                         |
| ABT1           | 3.48        | 0.34            | -1.46           | 7.62E-06 | 0.0002    | activator of basal transcription 1                                                                                           |
| ACAN           | 3.04        | 0.4             | -1.2            | 5.49E-06 | 0.0002    | aggrecan                                                                                                                     |
| ACER2          | -3.14       | -1.37           | 0.28            | 2.94E-05 | 0.0003    | alkaline ceramidase 2                                                                                                        |
| ACER3          | 3.65        | 0.43            | -1.44           | 2.67E-05 | 0.0003    | alkaline ceramidase 3                                                                                                        |
| ACO2           | -3.01       | -1.3            | 0.29            | 7.18E-06 | 0.0002    | aconitase 2, mitochondrial                                                                                                   |
| ACOT13         | 3.37        | 0.32            | -1.43           | 2.42E-06 | 0.0002    | acyl-CoA thioesterase 13                                                                                                     |
| ACP5           | -3.07       | -1.35           | 0.27            | 0.0001   | 0.0006    | acid phosphatase 5, tartrate resistant                                                                                       |
| ACSF3          | 3.4         | 0.32            | -1.44           | 4.76E-06 | 0.0002    | acyl-CoA synthetase family member 3                                                                                          |
| ACSM2B; ACSM2A | 3.24        | 0.32            | -1.38           | 2.95E-05 | 0.0003    | acyl-CoA synthetase medium-chain family member 2B; acyl-CoA synthetase medium-chain family member 2A                         |
| ACTL7A         | 3.31        | 0.33            | -1.4            | 2.59E-05 | 0.0003    | actin-like 7A                                                                                                                |
| ACTL8          | -3.29       | -1.31           | 0.4             | 1.50E-05 | 0.0002    | actin-like 8                                                                                                                 |
| ACTN1          | -3.23       | -1.36           | 0.34            | 9.43E-06 | 0.0002    | actinin, alpha 1                                                                                                             |
| ACTN3          | -3.15       | -1.38           | 0.27            | 4.17E-05 | 0.0003    | actinin, alpha 3 (gene/pseudogene)                                                                                           |
| ACTR8          | -3.03       | -1.32           | 0.28            | 2.40E-05 | 0.0002    | ARP8 actin-related protein 8 homolog (yeast)                                                                                 |
| ACVR1B         | -3.01       | -1.31           | 0.28            | 3.95E-05 | 0.0003    | activin A receptor type IB                                                                                                   |
| ADAM7          | -3.04       | -1.38           | 0.22            | 0.0001   | 0.0006    | ADAM metallopeptidase domain 7                                                                                               |
| ADAM8          | -3.09       | -1.28           | 0.35            | 2.72E-05 | 0.0003    | ADAM metallopeptidase domain 8                                                                                               |
| ADAMTS5        | 3.07        | 0.17            | -1.44           | 1.14E-05 | 0.0002    | ADAM metallopeptidase with thrombospondin type 1 motif 5                                                                     |
| ADAT2          | -3.29       | -1.31           | 0.4             | 2.44E-05 | 0.0002    | adenosine deaminase, tRNA-specific 2                                                                                         |
| ADCK2          | 3.01        | 0.21            | -1.38           | 5.28E-05 | 0.0004    | aarF domain containing kinase 2                                                                                              |
| ADCY10P1       | 3.51        | 0.34            | -1.47           | 0.0003   | 0.0012    | adenylate cyclase 10 (soluble) pseudogene 1                                                                                  |

|                   |       |       |       |          |        |                                                                                                                                                                                                                                                        |
|-------------------|-------|-------|-------|----------|--------|--------------------------------------------------------------------------------------------------------------------------------------------------------------------------------------------------------------------------------------------------------|
| ADCY2             | 3.26  | 0.28  | -1.43 | 9.17E-06 | 0.0002 | adenylate cyclase 2 (brain)                                                                                                                                                                                                                            |
| ADCY5             | 3.23  | 0.4   | -1.29 | 1.34E-05 | 0.0002 | adenylate cyclase 5                                                                                                                                                                                                                                    |
| ADD2              | 3.14  | 0.36  | -1.29 | 1.12E-05 | 0.0002 | adducin 2 (beta)                                                                                                                                                                                                                                       |
| ADGRB2            | 3.05  | 0.23  | -1.38 | 3.81E-05 | 0.0003 | adhesion G protein-coupled receptor B2                                                                                                                                                                                                                 |
| ADGRG6            | -3.05 | -1.31 | 0.29  | 2.20E-05 | 0.0002 | adhesion G protein-coupled receptor G6                                                                                                                                                                                                                 |
| ADGRL2            | -3.05 | -1.3  | 0.31  | 7.13E-06 | 0.0002 | adhesion G protein-coupled receptor L2                                                                                                                                                                                                                 |
| ADH7              | -3.05 | -1.31 | 0.3   | 2.11E-05 | 0.0002 | alcohol dehydrogenase 7 (class IV), mu or sigma polypeptide                                                                                                                                                                                            |
| ADIRF; AGAP11     | -3.04 | -1.28 | 0.32  | 9.50E-05 | 0.0005 | adipogenesis regulatory factor; ankyrin repeat and GTPase domain Arf GTPase activating protein 11                                                                                                                                                      |
| ADM               | 3.29  | 0.41  | -1.31 | 4.08E-05 | 0.0003 | adrenomedullin                                                                                                                                                                                                                                         |
| SPECC1L-ADORA2    | -3.19 | -1.31 | 0.36  | 2.77E-05 | 0.0003 | adenosine A2a receptor; SPECC1L-ADORA2A readthrough (NMD candidate); sperm antigen with calponin homology and coiled-coil domains 1-like                                                                                                               |
| ADPRHL1           | 3.07  | 0.22  | -1.4  | 1.14E-05 | 0.0002 | ADP-ribosylhydrolase like 1                                                                                                                                                                                                                            |
| ADRB2             | -3.16 | -1.38 | 0.28  | 4.14E-05 | 0.0003 | adrenoceptor beta 2, surface                                                                                                                                                                                                                           |
| ADRBK1            | -3.33 | -1.33 | 0.4   | 0.0001   | 0.0006 | adrenergic, beta, receptor kinase 1                                                                                                                                                                                                                    |
| ADRBK2            | -3.2  | -1.31 | 0.36  | 5.44E-05 | 0.0004 | adrenergic, beta, receptor kinase 2                                                                                                                                                                                                                    |
| ADRM1             | 3.51  | 0.43  | -1.38 | 2.93E-06 | 0.0002 | adhesion regulating molecule 1                                                                                                                                                                                                                         |
| AFF2              | 3     | 0.06  | -1.53 | 5.80E-05 | 0.0004 | AF4/FMR2 family, member 2                                                                                                                                                                                                                              |
| AP5; AGAP9; AGAP  | -3.03 | -1.32 | 0.28  | 2.90E-05 | 0.0003 | ArfGAP with GTPase domain, ankyrin repeat and PH domain 6; ArfGAP with GTPase domain, ankyrin repeat and PH domain 9                                                                                                                                   |
| AGAP6; AGAP9      | -3.07 | -1.36 | 0.25  | 1.20E-05 | 0.0002 | ArfGAP with GTPase domain, ankyrin repeat and PH domain 6; ArfGAP with GTPase domain, ankyrin repeat and PH domain 9                                                                                                                                   |
| AP6; AGAP9; AGAF  | -3.01 | -1.31 | 0.28  | 9.90E-06 | 0.0002 | ArfGAP with GTPase domain, ankyrin repeat and PH domain 6; ArfGAP with GTPase domain, ankyrin repeat and PH domain 9; ankyrin repeat and GTPase domain Arf GTPase activating protein 11                                                                |
| AP6; AGAP9; AGA   | -3.03 | -1.33 | 0.27  | 7.49E-06 | 0.0002 | ArfGAP with GTPase domain, ankyrin repeat and PH domain 6; ArfGAP with GTPase domain, ankyrin repeat and PH domain 9; ArfGAP with GTPase domain, ankyrin repeat and PH domain 4                                                                        |
| ; AGAP9; AGAP4; A | -3.01 | -1.32 | 0.27  | 9.46E-06 | 0.0002 | ArfGAP with GTPase domain, ankyrin repeat and PH domain 6; ArfGAP with GTPase domain, ankyrin repeat and PH domain 9; ArfGAP with GTPase domain, ankyrin repeat and PH domain 4; ankyrin repeat and GTPase domain Arf GTPase activating protein 11     |
| ; AGAP9; AGAP4; A | -3.06 | -1.33 | 0.28  | 2.83E-05 | 0.0003 | ArfGAP with GTPase domain, ankyrin repeat and PH domain 6; ArfGAP with GTPase domain, ankyrin repeat and PH domain 9; ArfGAP with GTPase domain, ankyrin repeat and PH domain 4; ArfGAP with GTPase domain, ankyrin repeat and PH domain 7, pseudogene |
| AGAP9             | -3.01 | -1.31 | 0.28  | 1.21E-05 | 0.0002 | ArfGAP with GTPase domain, ankyrin repeat and PH domain 9                                                                                                                                                                                              |
| AGAP9             | -3.01 | -1.31 | 0.28  | 1.21E-05 | 0.0002 | ArfGAP with GTPase domain, ankyrin repeat and PH domain 9                                                                                                                                                                                              |
| AGBL2             | -3.12 | -1.28 | 0.36  | 3.70E-06 | 0.0002 | ATP/GTP binding protein-like 2                                                                                                                                                                                                                         |
| AGXT              | -3.2  | -1.31 | 0.36  | 8.56E-06 | 0.0002 | alanine-glyoxylate aminotransferase                                                                                                                                                                                                                    |
| AHDC1             | 3     | 0.16  | -1.43 | 5.76E-06 | 0.0002 | AT hook, DNA binding motif, containing 1                                                                                                                                                                                                               |
| AIF1              | 3.25  | 0.5   | -1.2  | 0.0002   | 0.0010 | allograft inflammatory factor 1                                                                                                                                                                                                                        |
| AIF1              | 3.25  | 0.5   | -1.2  | 0.0002   | 0.0010 | allograft inflammatory factor 1                                                                                                                                                                                                                        |
| AIF1              | 3.25  | 0.5   | -1.2  | 0.0002   | 0.0010 | allograft inflammatory factor 1                                                                                                                                                                                                                        |
| AKIRIN1           | -3.16 | -1.38 | 0.28  | 1.67E-05 | 0.0002 | akirin 1                                                                                                                                                                                                                                               |
| AKR1C4            | -3.14 | -1.38 | 0.27  | 1.50E-05 | 0.0002 | aldo-keto reductase family 1, member C4                                                                                                                                                                                                                |
| AKR7A2            | 3.21  | 0.29  | -1.39 | 4.12E-05 | 0.0003 | aldo-keto reductase family 7, member A2                                                                                                                                                                                                                |
| AKR7A2P1          | 3.46  | 0.39  | -1.4  | 0.0002   | 0.0009 | aldo-keto reductase family 7, member A2 pseudogene 1                                                                                                                                                                                                   |
| ALDH1A2           | 3.06  | 0.32  | -1.29 | 7.70E-06 | 0.0002 | aldehyde dehydrogenase 1 family, member A2                                                                                                                                                                                                             |
| ALDH5A1           | 3.02  | 0.39  | -1.2  | 9.54E-06 | 0.0002 | aldehyde dehydrogenase 5 family, member A1                                                                                                                                                                                                             |
| ALDH8A1           | -3.2  | -1.42 | 0.26  | 2.33E-05 | 0.0002 | aldehyde dehydrogenase 8 family, member A1                                                                                                                                                                                                             |
| ALG10             | -3.14 | -1.36 | 0.29  | 3.60E-05 | 0.0003 | ALG10, alpha-1,2-glucosyltransferase                                                                                                                                                                                                                   |

|                   |       |       |       |          |        |                                                                                      |
|-------------------|-------|-------|-------|----------|--------|--------------------------------------------------------------------------------------|
| ALG10B; ALG10     | -3.07 | -1.33 | 0.29  | 4.50E-05 | 0.0003 | ALG10B, alpha-1,2-glucosyltransferase; ALG10, alpha-1,2-glucosyltransferase          |
| ALKBH2            | -3.12 | -1.36 | 0.28  | 3.56E-05 | 0.0003 | alkB homolog 2, alpha-ketoglutarate-dependent dioxygenase                            |
| ALKBH3; SEC14L1P: | 3.1   | 0.43  | -1.2  | 3.19E-05 | 0.0003 | alkB homolog 3, alpha-ketoglutarate-dependent dioxygenase; SEC14-like 1 pseudogene 1 |
| ALKBH5            | 3.26  | 0.32  | -1.38 | 9.20E-06 | 0.0002 | alkB homolog 5, RNA demethylase                                                      |
| ALS2CR12          | -3.12 | -1.36 | 0.28  | 1.67E-05 | 0.0002 | amyotrophic lateral sclerosis 2 chromosome region candidate 12                       |
| AMER3             | -3.12 | -1.36 | 0.28  | 2.64E-05 | 0.0003 | APC membrane recruitment protein 3                                                   |
| AMHR2             | -3.02 | -1.33 | 0.26  | 0.0001   | 0.0006 | anti-Mullerian hormone receptor, type II                                             |
| AMOTL1            | 3.26  | 0.32  | -1.38 | 4.05E-06 | 0.0002 | angiomin 1                                                                           |
| AMPD3             | -3.37 | -1.43 | 0.32  | 3.84E-05 | 0.0003 | adenosine monophosphate deaminase 3                                                  |
| AMT; NICN1        | -3.08 | -1.31 | 0.31  | 0.0001   | 0.0007 | aminomethyltransferase; nicotin 1                                                    |
| AMZ1              | 3.2   | 0.25  | -1.43 | 1.34E-05 | 0.0002 | archaelysin family metalloproteinase 1                                               |
| ANAPC10           | -3.33 | -1.39 | 0.35  | 4.36E-05 | 0.0003 | anaphase promoting complex subunit 10                                                |
| ANAPC13           | 3.26  | 0.32  | -1.38 | 2.96E-05 | 0.0003 | anaphase promoting complex subunit 13                                                |
| ANGPT4            | 3.37  | 0.32  | -1.43 | 3.11E-06 | 0.0002 | angiopoietin 4                                                                       |
| ANKRD13B          | -3.23 | -1.32 | 0.37  | 2.38E-05 | 0.0002 | ankyrin repeat domain 13B                                                            |
| ANKRD2            | -3.04 | -1.28 | 0.32  | 2.87E-05 | 0.0003 | ankyrin repeat domain 2 (stretch responsive muscle)                                  |
| ANKRD29           | -3    | -1.28 | 0.31  | 4.17E-06 | 0.0002 | ankyrin repeat domain 29                                                             |
| ANKRD30BL         | -3.35 | -1.41 | 0.33  | 0.0001   | 0.0007 | ankyrin repeat domain 30B-like                                                       |
| ANKRD33           | 3.35  | 0.36  | -1.39 | 4.07E-06 | 0.0002 | ankyrin repeat domain 33                                                             |
| ANKRD53           | -3.03 | -1.3  | 0.3   | 2.80E-05 | 0.0003 | ankyrin repeat domain 53                                                             |
| ANKRD6            | 3.47  | 0.32  | -1.47 | 3.35E-06 | 0.0002 | ankyrin repeat domain 6                                                              |
| ANO8              | -3.01 | -1.31 | 0.28  | 6.06E-05 | 0.0004 | anoctamin 8                                                                          |
| ANTXR2            | 3.26  | 0.32  | -1.38 | 0.0001   | 0.0006 | anthrax toxin receptor 2                                                             |
| ANXA11            | -3.01 | -1.31 | 0.28  | 3.35E-05 | 0.0003 | annexin A11                                                                          |
| ANXA2             | -3.37 | -1.44 | 0.31  | 1.16E-05 | 0.0002 | annexin A2                                                                           |
| ANXA9             | 3.3   | 0.29  | -1.44 | 2.74E-06 | 0.0002 | annexin A9                                                                           |
| AP3S1             | -3.11 | -1.31 | 0.32  | 1.28E-05 | 0.0002 | adaptor-related protein complex 3, sigma 1 subunit                                   |
| AP5Z1             | -3.2  | -1.44 | 0.24  | 9.63E-05 | 0.0005 | adaptor-related protein complex 5, zeta 1 subunit                                    |
| APBB1             | 3.37  | 0.32  | -1.43 | 7.67E-06 | 0.0002 | amyloid beta (A4) precursor protein-binding, family B, member 1 (Fe65)               |
| API5              | 3.97  | 0.51  | -1.48 | 3.47E-06 | 0.0002 | apoptosis inhibitor 5                                                                |
| APOBEC2           | -3.16 | -1.35 | 0.31  | 5.63E-05 | 0.0004 | apolipoprotein B mRNA editing enzyme, catalytic polypeptide-like 2                   |
| APOC2; APOC4-APO  | 3.26  | 0.32  | -1.38 | 3.04E-05 | 0.0003 | apolipoprotein C-II; APOC4-APOC2 readthrough (NMD candidate)                         |
| APOH              | 3.44  | 0.34  | -1.44 | 6.46E-06 | 0.0002 | apolipoprotein H (beta-2-glycoprotein I)                                             |
| AQP1              | -3.1  | -1.38 | 0.25  | 1.98E-05 | 0.0002 | aquaporin 1 (Colton blood group)                                                     |
| ARF1              | 3.42  | 0.39  | -1.38 | 5.89E-06 | 0.0002 | ADP-ribosylation factor 1                                                            |
| ARF4              | -3.2  | -1.31 | 0.36  | 4.32E-06 | 0.0002 | ADP-ribosylation factor 4                                                            |
| ARFGAP2           | 3.06  | 0.21  | -1.4  | 5.60E-05 | 0.0004 | ADP-ribosylation factor GTPase activating protein 2                                  |
| ARFRP1            | -3.05 | -1.37 | 0.24  | 3.77E-05 | 0.0003 | ADP-ribosylation factor related protein 1                                            |



|                   |       |       |       |          |        |                                                                                     |
|-------------------|-------|-------|-------|----------|--------|-------------------------------------------------------------------------------------|
| ARGFX             | -3.18 | -1.38 | 0.29  | 2.24E-05 | 0.0002 | arginine-fifty homeobox                                                             |
| ARHGAP23          | -3.15 | -1.43 | 0.22  | 2.42E-05 | 0.0002 | Rho GTPase activating protein 23                                                    |
| ARHGAP25          | -3.07 | -1.34 | 0.28  | 5.37E-06 | 0.0002 | Rho GTPase activating protein 25                                                    |
| ARHGAP27          | 3.56  | 0.43  | -1.4  | 3.89E-06 | 0.0002 | Rho GTPase activating protein 27                                                    |
| ARHGEF15          | -3.14 | -1.37 | 0.28  | 4.44E-05 | 0.0003 | Rho guanine nucleotide exchange factor 15                                           |
| ARHGEF16          | -3.06 | -1.31 | 0.3   | 1.85E-05 | 0.0002 | Rho guanine nucleotide exchange factor 16                                           |
| ARHGEF25; SLC26A1 | -3.02 | -1.35 | 0.24  | 3.34E-05 | 0.0003 | Rho guanine nucleotide exchange factor 25; solute carrier family 26, member 10      |
| ARHGEF35; ARHGEF  | 3.19  | 0.28  | -1.39 | 2.03E-05 | 0.0002 | Rho guanine nucleotide exchange factor 35; Rho guanine nucleotide exchange factor 5 |
| ARHGEF37          | 3.31  | 0.32  | -1.4  | 1.85E-05 | 0.0002 | Rho guanine nucleotide exchange factor 37                                           |
| ARID3C            | -3.16 | -1.38 | 0.28  | 3.36E-05 | 0.0003 | AT rich interactive domain 3C (BRIGHT-like)                                         |
| ARL6IP1           | -3.09 | -1.28 | 0.35  | 5.70E-06 | 0.0002 | ADP-ribosylation factor like GTPase 6 interacting protein 1                         |
| ARL6IP4           | -3.2  | -1.31 | 0.36  | 4.25E-05 | 0.0003 | ADP-ribosylation factor like GTPase 6 interacting protein 4                         |
| ARL9              | -3.06 | -1.33 | 0.28  | 6.43E-05 | 0.0004 | ADP-ribosylation factor like GTPase 9                                               |
| ARMC1             | -3.04 | -1.38 | 0.22  | 1.32E-05 | 0.0002 | armadillo repeat containing 1                                                       |
| ARMC4             | -3.33 | -1.32 | 0.41  | 5.68E-05 | 0.0004 | armadillo repeat containing 4                                                       |
| ARPC2             | -3.09 | -1.28 | 0.35  | 8.30E-05 | 0.0005 | actin related protein 2/3 complex subunit 2                                         |
| ARPC3             | 3.61  | 0.47  | -1.38 | 9.14E-05 | 0.0005 | actin related protein 2/3 complex subunit 3                                         |
| ARPC5             | -3.15 | -1.33 | 0.32  | 1.02E-05 | 0.0002 | actin related protein 2/3 complex subunit 5                                         |
| ARPC5; BORCS7-AS1 | 3.26  | 0.32  | -1.38 | 2.08E-05 | 0.0002 | arsenite methyltransferase; BORCS7-ASMT readthrough (NMD candidate)                 |
| ASAP1             | -3.01 | -1.38 | 0.21  | 2.97E-05 | 0.0003 | ArfGAP with SH3 domain, ankyrin repeat and PH domain 1                              |
| ASAP3             | -3.09 | -1.28 | 0.35  | 4.08E-06 | 0.0002 | ArfGAP with SH3 domain, ankyrin repeat and PH domain 3                              |
| ASB16             | -3.32 | -1.38 | 0.35  | 2.92E-05 | 0.0003 | ankyrin repeat and SOCS box containing 16                                           |
| ASB18             | -3.04 | -1.36 | 0.25  | 2.81E-05 | 0.0003 | ankyrin repeat and SOCS box containing 18                                           |
| ASB7              | 3.07  | 0.42  | -1.2  | 1.74E-05 | 0.0002 | ankyrin repeat and SOCS box containing 7                                            |
| ASCC2             | -3.32 | -1.38 | 0.35  | 3.05E-06 | 0.0002 | activating signal cointegrator 1 complex subunit 2                                  |
| ASF1B             | -3.11 | -1.31 | 0.32  | 9.85E-06 | 0.0002 | anti-silencing function 1B histone chaperone                                        |
| ASTN1             | 3.02  | 0.39  | -1.2  | 1.41E-05 | 0.0002 | astrotactin 1                                                                       |
| ATF5; MIR4751     | 3.07  | 0.24  | -1.38 | 8.23E-06 | 0.0002 | activating transcription factor 5; microRNA 4751                                    |
| ATF6B; TNXB       | 3.48  | 0.42  | -1.38 | 6.48E-06 | 0.0002 | activating transcription factor 6 beta; tenascin XB                                 |
| ATF6B; TNXB       | 3.39  | 0.37  | -1.39 | 7.65E-06 | 0.0002 | activating transcription factor 6 beta; tenascin XB                                 |
| ATL2              | 3.43  | 0.35  | -1.43 | 8.47E-06 | 0.0002 | atlastin GTPase 2                                                                   |
| ATP1B4            | -3.15 | -1.36 | 0.3   | 3.24E-05 | 0.0003 | ATPase, Na+/K+ transporting, beta 4 polypeptide                                     |
| ATP2A3            | 3.07  | 0.42  | -1.2  | 4.17E-06 | 0.0002 | ATPase, Ca++ transporting, ubiquitous                                               |
| ATP5I             | -3.12 | -1.32 | 0.32  | 2.53E-05 | 0.0003 | ATP synthase, H+ transporting, mitochondrial Fo complex subunit E                   |
| ATP5L2            | 3.02  | 0.39  | -1.2  | 1.16E-05 | 0.0002 | ATP synthase, H+ transporting, mitochondrial Fo complex subunit G2                  |
| ATP6V0A1          | 3.28  | 0.29  | -1.43 | 0.0001   | 0.0007 | ATPase, H+ transporting, lysosomal V0 subunit a1                                    |
| ATP6V0E2-AS1      | -3.23 | -1.35 | 0.34  | 6.15E-05 | 0.0004 | ATP6V0E2 antisense RNA 1                                                            |
| ATP6V1E2          | 3.3   | 0.32  | -1.4  | 3.31E-06 | 0.0002 | ATPase, H+ transporting, lysosomal 31kDa, V1 subunit E2                             |

|             |       |       |       |          |        |                                                                   |
|-------------|-------|-------|-------|----------|--------|-------------------------------------------------------------------|
| ATXN2L      | 3.45  | 0.39  | -1.4  | 6.67E-06 | 0.0002 | ataxin 2-like                                                     |
| ATXN3L      | -3.01 | -1.31 | 0.28  | 4.11E-05 | 0.0003 | ataxin 3-like                                                     |
| ATXN7L1     | 3.04  | 0.22  | -1.38 | 4.30E-06 | 0.0002 | ataxin 7-like 1                                                   |
| ATXN7L3     | -3.07 | -1.28 | 0.34  | 3.14E-05 | 0.0003 | ataxin 7-like 3                                                   |
| AUNIP       | 3.1   | 0.32  | -1.31 | 1.03E-05 | 0.0002 | aurora kinase A and ninein interacting protein                    |
| AURKB       | -3.01 | -1.31 | 0.28  | 3.46E-06 | 0.0002 | aurora kinase B                                                   |
| AVPI1       | 3.02  | 0.39  | -1.2  | 4.41E-06 | 0.0002 | arginine vasopressin-induced 1                                    |
| AZGP1       | 3.01  | 0.19  | -1.4  | 5.28E-05 | 0.0004 | alpha-2-glycoprotein 1, zinc-binding                              |
| AZIN2       | -3.01 | -1.31 | 0.28  | 2.09E-05 | 0.0002 | antizyme inhibitor 2                                              |
| B3GALT5-AS1 | 3.42  | 0.39  | -1.38 | 2.77E-05 | 0.0003 | B3GALT5 antisense RNA 1                                           |
| B3GLCT      | -3.16 | -1.38 | 0.28  | 9.11E-05 | 0.0005 | beta 3-glucosyltransferase                                        |
| B3GNT9      | 3.3   | 0.32  | -1.4  | 2.20E-05 | 0.0002 | UDP-GlcNAc:betaGal beta-1,3-N-acetylglucosaminyltransferase 9     |
| B4GALNT2    | -3.08 | -1.36 | 0.26  | 1.74E-05 | 0.0002 | beta-1,4-N-acetyl-galactosaminyl transferase 2                    |
| B4GALT6     | 3.26  | 0.32  | -1.38 | 0.0001   | 0.0007 | UDP-Gal:betaGlcNAc beta 1,4- galactosyltransferase, polypeptide 6 |
| BAAT        | -3.16 | -1.38 | 0.28  | 5.45E-05 | 0.0004 | bile acid-CoA:amino acid N-acyltransferase                        |
| BABAM1      | -3.13 | -1.28 | 0.36  | 2.38E-05 | 0.0002 | BRISC and BRCA1 A complex member 1                                |
| BAIAP3      | 3.16  | 0.28  | -1.38 | 8.77E-06 | 0.0002 | BAI1-associated protein 3                                         |
| BARD1       | 3.41  | 0.37  | -1.4  | 2.98E-06 | 0.0002 | BRCA1 associated RING domain 1                                    |
| BARHL1      | 3.21  | 0.3   | -1.38 | 2.65E-05 | 0.0003 | BarH-like homeobox 1                                              |
| BARX1       | -3.1  | -1.36 | 0.27  | 1.72E-05 | 0.0002 | BARX homeobox 1                                                   |
| BATF3       | 3.4   | 0.38  | -1.38 | 0.0002   | 0.0009 | basic leucine zipper transcription factor, ATF-like 3             |
| BCAN        | -3.11 | -1.31 | 0.32  | 1.09E-05 | 0.0002 | brevican                                                          |
| BCAT2       | 3.27  | 0.33  | -1.38 | 2.65E-06 | 0.0002 | branched chain amino-acid transaminase 2, mitochondrial           |
| BCKDK       | 3.3   | 0.32  | -1.4  | 7.63E-06 | 0.0002 | branched chain ketoacid dehydrogenase kinase                      |
| BCL11A      | -3.03 | -1.32 | 0.28  | 2.75E-05 | 0.0003 | B-cell CLL/lymphoma 11A (zinc finger protein)                     |
| BCL2L1      | -3.05 | -1.31 | 0.29  | 6.50E-05 | 0.0004 | BCL2-like 1                                                       |
| BCLAF1      | -3.33 | -1.38 | 0.35  | 0.0002   | 0.0007 | BCL2-associated transcription factor 1                            |
| BCRP2; BCR  | 3.46  | 0.39  | -1.4  | 1.59E-05 | 0.0002 | breakpoint cluster region pseudogene 2; breakpoint cluster region |
| BEGAIN      | 3.52  | 0.43  | -1.38 | 7.14E-06 | 0.0002 | brain-enriched guanylate kinase-associated                        |
| BEX4        | -3.07 | -1.3  | 0.32  | 7.24E-05 | 0.0004 | brain expressed X-linked 4                                        |
| BHLHB9      | 3.11  | 0.24  | -1.4  | 5.51E-05 | 0.0004 | basic helix-loop-helix domain containing, class B, 9              |
| BIRC8       | 3.25  | 0.3   | -1.4  | 3.39E-05 | 0.0003 | baculoviral IAP repeat containing 8                               |
| BLOC1S1     | 3.06  | 0.32  | -1.29 | 1.99E-05 | 0.0002 | biogenesis of lysosomal organelles complex-1, subunit 1           |
| BLVRB       | -3.15 | -1.38 | 0.27  | 2.34E-05 | 0.0002 | biliverdin reductase B                                            |
| BMP5        | -3.01 | -1.31 | 0.28  | 1.19E-05 | 0.0002 | bone morphogenetic protein 5                                      |
| BMP7        | 3.59  | 0.43  | -1.41 | 2.34E-05 | 0.0002 | bone morphogenetic protein 7                                      |
| BOP1        | -3.13 | -1.35 | 0.3   | 1.00E-05 | 0.0002 | block of proliferation 1                                          |
| BRD2        | -3.03 | -1.32 | 0.28  | 8.59E-05 | 0.0005 | bromodomain containing 2                                          |

|                |       |       |       |          |        |                                                                                                                                                                             |
|----------------|-------|-------|-------|----------|--------|-----------------------------------------------------------------------------------------------------------------------------------------------------------------------------|
| BRD2           | -3.12 | -1.36 | 0.28  | 0.0001   | 0.0006 | bromodomain containing 2                                                                                                                                                    |
| BRD7           | -3.08 | -1.28 | 0.34  | 1.17E-05 | 0.0002 | bromodomain containing 7                                                                                                                                                    |
| BRD9           | -3.39 | -1.41 | 0.35  | 4.63E-05 | 0.0003 | bromodomain containing 9                                                                                                                                                    |
| BRK1           | -3.04 | -1.36 | 0.24  | 5.03E-05 | 0.0003 | BRICK1, SCAR/WAVE actin-nucleating complex subunit                                                                                                                          |
| BRS3           | -3.05 | -1.41 | 0.2   | 5.84E-06 | 0.0002 | bombesin-like receptor 3                                                                                                                                                    |
| BTBD1          | -3.11 | -1.31 | 0.33  | 2.41E-05 | 0.0002 | BTB (POZ) domain containing 1                                                                                                                                               |
| BTG4           | -3.14 | -1.37 | 0.28  | 7.22E-05 | 0.0004 | B-cell translocation gene 4                                                                                                                                                 |
| BTK            | 3.31  | 0.33  | -1.4  | 7.92E-06 | 0.0002 | Bruton agammaglobulinemia tyrosine kinase                                                                                                                                   |
| BTRC           | 3.55  | 0.36  | -1.47 | 2.34E-05 | 0.0002 | beta-transducin repeat containing E3 ubiquitin protein ligase                                                                                                               |
| C11orf31       | 3.52  | 0.43  | -1.38 | 7.14E-06 | 0.0002 | chromosome 11 open reading frame 31                                                                                                                                         |
| C11orf40       | -3.01 | -1.28 | 0.31  | 3.57E-05 | 0.0003 | chromosome 11 open reading frame 40                                                                                                                                         |
| C11orf53       | 3.04  | 0.4   | -1.2  | 2.77E-05 | 0.0003 | chromosome 11 open reading frame 53                                                                                                                                         |
| C11orf80; RCE1 | -3.01 | -1.31 | 0.28  | 5.26E-06 | 0.0002 | chromosome 11 open reading frame 80; Ras converting CAAX endopeptidase 1                                                                                                    |
| C11orf88       | 3.28  | 0.31  | -1.4  | 2.14E-05 | 0.0002 | chromosome 11 open reading frame 88                                                                                                                                         |
| C12orf76       | -3.02 | -1.31 | 0.28  | 2.49E-05 | 0.0002 | chromosome 12 open reading frame 76                                                                                                                                         |
| C15orf39       | 3.05  | 0.31  | -1.3  | 5.33E-06 | 0.0002 | chromosome 15 open reading frame 39                                                                                                                                         |
| C15orf43       | -3    | -1.33 | 0.25  | 2.11E-05 | 0.0002 | chromosome 15 open reading frame 43                                                                                                                                         |
| C15orf52       | -3.04 | -1.28 | 0.32  | 6.40E-06 | 0.0002 | chromosome 15 open reading frame 52                                                                                                                                         |
| C16orf13       | -3.13 | -1.31 | 0.34  | 3.08E-06 | 0.0002 | chromosome 16 open reading frame 13                                                                                                                                         |
| C16orf59       | 3.28  | 0.32  | -1.4  | 2.12E-05 | 0.0002 | chromosome 16 open reading frame 59                                                                                                                                         |
| C16orf70       | -3.03 | -1.32 | 0.28  | 5.89E-06 | 0.0002 | chromosome 16 open reading frame 70                                                                                                                                         |
| C16orf71       | -3.01 | -1.31 | 0.28  | 4.44E-06 | 0.0002 | chromosome 16 open reading frame 71                                                                                                                                         |
| C18orf12       | -3.16 | -1.3  | 0.36  | 5.76E-06 | 0.0002 | chromosome 18 open reading frame 12                                                                                                                                         |
| C19orf60       | -3.1  | -1.36 | 0.27  | 1.24E-05 | 0.0002 | chromosome 19 open reading frame 60                                                                                                                                         |
| PRAMEF12       | 3.09  | 0.25  | -1.38 | 4.05E-06 | 0.0002 | chromosome 1 open reading frame 158; PRAME family member 12                                                                                                                 |
| C1orf186       | 3.41  | 0.32  | -1.44 | 1.35E-05 | 0.0002 | chromosome 1 open reading frame 186                                                                                                                                         |
| C1orf216       | 3.33  | 0.53  | -1.2  | 2.91E-05 | 0.0003 | chromosome 1 open reading frame 216                                                                                                                                         |
| C1orf74        | -3.06 | -1.39 | 0.23  | 1.21E-05 | 0.0002 | chromosome 1 open reading frame 74                                                                                                                                          |
| C1orf94        | -3.1  | -1.3  | 0.34  | 7.99E-06 | 0.0002 | chromosome 1 open reading frame 94                                                                                                                                          |
| C1RL-AS1       | -3.06 | -1.38 | 0.23  | 4.69E-05 | 0.0003 | C1RL antisense RNA 1                                                                                                                                                        |
| C1S            | -3.08 | -1.31 | 0.31  | 3.59E-06 | 0.0002 | complement component 1, s subcomponent                                                                                                                                      |
| C2orf15        | 3.37  | 0.33  | -1.43 | 8.74E-06 | 0.0002 | chromosome 2 open reading frame 15                                                                                                                                          |
| C2orf50        | -3.09 | -1.28 | 0.35  | 7.31E-06 | 0.0002 | chromosome 2 open reading frame 50                                                                                                                                          |
| C2orf70        | -3.01 | -1.31 | 0.28  | 4.80E-05 | 0.0003 | chromosome 2 open reading frame 70                                                                                                                                          |
| STK19          | 3.53  | 0.37  | -1.44 | 2.29E-05 | 0.0002 | complement component 4A (Rodgers blood group); complement component 4B (Chido blood group); complement component 4B (Chido blood group), copy 2; serine/threonine kinase 19 |
| STK19          | 3.53  | 0.37  | -1.44 | 2.29E-05 | 0.0002 | complement component 4A (Rodgers blood group); complement component 4B (Chido blood group); complement component 4B (Chido blood group), copy 2; serine/threonine kinase 19 |
| STK19          | 3.53  | 0.37  | -1.44 | 2.29E-05 | 0.0002 | complement component 4A (Rodgers blood group); complement component 4B (Chido blood group); complement component 4B (Chido blood group), copy 2; serine/threonine kinase 19 |
| C4orf3         | -3.09 | -1.36 | 0.26  | 7.29E-06 | 0.0002 | chromosome 4 open reading frame 3                                                                                                                                           |

|           |       |       |       |          |        |                                                                                |
|-----------|-------|-------|-------|----------|--------|--------------------------------------------------------------------------------|
| C6orf1    | -3.01 | -1.31 | 0.28  | 1.29E-05 | 0.0002 | chromosome 6 open reading frame 1                                              |
| C6orf118  | -3.23 | -1.41 | 0.28  | 2.25E-05 | 0.0002 | chromosome 6 open reading frame 118                                            |
| C6orf203  | 3.58  | 0.41  | -1.43 | 3.05E-06 | 0.0002 | chromosome 6 open reading frame 203                                            |
| C6orf222  | 3.54  | 0.44  | -1.38 | 7.23E-05 | 0.0004 | chromosome 6 open reading frame 222                                            |
| C7        | -3.01 | -1.33 | 0.26  | 2.89E-05 | 0.0003 | complement component 7                                                         |
| C7orf34   | -3.14 | -1.35 | 0.3   | 3.21E-05 | 0.0003 | chromosome 7 open reading frame 34                                             |
| C7orf55   | 3.31  | 0.34  | -1.39 | 1.81E-05 | 0.0002 | C7orf55-LUC7L2 readthrough; chromosome 7 open reading frame 55                 |
| TSC22D4   | -3.15 | -1.35 | 0.31  | 9.22E-06 | 0.0002 | chromosome 7 open reading frame 61; TSC22 domain family, member 4              |
| C7orf72   | -3.09 | -1.36 | 0.26  | 3.79E-05 | 0.0003 | chromosome 7 open reading frame 72                                             |
| C8orf74   | 3.12  | 0.25  | -1.39 | 7.00E-06 | 0.0002 | chromosome 8 open reading frame 74                                             |
| S1PR3     | -3.07 | -1.28 | 0.34  | 2.69E-05 | 0.0003 | chromosome 9 open reading frame 47; sphingosine-1-phosphate receptor 3         |
| CA11      | 3.02  | 0.39  | -1.2  | 5.65E-06 | 0.0002 | carbonic anhydrase XI                                                          |
| CA6       | -3.22 | -1.41 | 0.28  | 3.16E-05 | 0.0003 | carbonic anhydrase VI                                                          |
| CABP1     | 3.1   | 0.43  | -1.2  | 7.73E-06 | 0.0002 | calcium binding protein 1                                                      |
| CADM3     | -3.12 | -1.36 | 0.28  | 1.68E-05 | 0.0002 | cell adhesion molecule 3                                                       |
| CADPS2    | -3.22 | -1.36 | 0.32  | 3.18E-05 | 0.0003 | Ca++-dependent secretion activator 2                                           |
| CALR      | 3.52  | 0.43  | -1.38 | 1.58E-05 | 0.0002 | calreticulin                                                                   |
| CAND1     | -3.06 | -1.32 | 0.29  | 3.81E-06 | 0.0002 | cullin-associated and neddylation-dissociated 1                                |
| CANX      | -3.01 | -1.31 | 0.28  | 1.03E-05 | 0.0002 | calnexin                                                                       |
| CAPN15    | -3.11 | -1.31 | 0.32  | 0.0002   | 0.0008 | calpain 15                                                                     |
| CAPN2     | 3.11  | 0.34  | -1.29 | 1.14E-05 | 0.0002 | calpain 2, (m/II) large subunit                                                |
| CAPN5     | 3.1   | 0.43  | -1.2  | 7.62E-05 | 0.0004 | calpain 5                                                                      |
| CAPNS1    | -3.04 | -1.38 | 0.22  | 1.04E-05 | 0.0002 | calpain, small subunit 1                                                       |
| CAPRIN1   | -3.12 | -1.3  | 0.34  | 5.18E-06 | 0.0002 | cell cycle associated protein 1                                                |
| CAPZA1    | 3.47  | 0.32  | -1.47 | 7.60E-06 | 0.0002 | capping protein (actin filament) muscle Z-line, alpha 1                        |
| CAV1      | 3.3   | 0.31  | -1.41 | 3.17E-05 | 0.0003 | caveolin 1                                                                     |
| CBARP     | 3.16  | 0.36  | -1.3  | 3.95E-06 | 0.0002 | calcium channel, voltage-dependent, beta subunit associated regulatory protein |
| CBS; CBSL | -3.02 | -1.31 | 0.28  | 1.08E-05 | 0.0002 | cystathionine-beta-synthase; cystathionine-beta-synthase like                  |
| CBY1      | -3.01 | -1.31 | 0.28  | 1.24E-05 | 0.0002 | chibby homolog 1 (Drosophila)                                                  |
| CC2D1B    | -3.01 | -1.31 | 0.28  | 1.09E-05 | 0.0002 | coiled-coil and C2 domain containing 1B                                        |
| CCDC115   | 3.56  | 0.43  | -1.4  | 2.77E-05 | 0.0003 | coiled-coil domain containing 115                                              |
| CCDC120   | -3.16 | -1.38 | 0.28  | 6.72E-06 | 0.0002 | coiled-coil domain containing 120                                              |
| CCDC129   | 3.06  | 0.23  | -1.38 | 8.88E-06 | 0.0002 | coiled-coil domain containing 129                                              |
| CCDC134   | -3.11 | -1.31 | 0.32  | 2.53E-05 | 0.0003 | coiled-coil domain containing 134                                              |
| CCDC14    | -3.21 | -1.43 | 0.25  | 0.0001   | 0.0007 | coiled-coil domain containing 14                                               |
| CCDC17    | -3    | -1.28 | 0.31  | 8.99E-06 | 0.0002 | coiled-coil domain containing 17                                               |
| CCDC189   | 3.39  | 0.32  | -1.44 | 1.18E-05 | 0.0002 | coiled-coil domain containing 189                                              |
| CCDC22    | 3.26  | 0.32  | -1.38 | 1.47E-05 | 0.0002 | coiled-coil domain containing 22                                               |

|          |       |       |       |          |        |                                                                           |
|----------|-------|-------|-------|----------|--------|---------------------------------------------------------------------------|
| CCDC27   | 3.01  | 0.18  | -1.41 | 9.98E-06 | 0.0002 | coiled-coil domain containing 27                                          |
| CCDC36   | -3.1  | -1.36 | 0.27  | 3.40E-05 | 0.0003 | coiled-coil domain containing 36                                          |
| CCDC58   | 3.37  | 0.32  | -1.43 | 4.56E-05 | 0.0003 | coiled-coil domain containing 58                                          |
| CCDC61   | 3.02  | 0.39  | -1.2  | 1.75E-05 | 0.0002 | coiled-coil domain containing 61                                          |
| CCDC63   | -3.12 | -1.36 | 0.28  | 8.94E-06 | 0.0002 | coiled-coil domain containing 63                                          |
| CCDC78   | -3.05 | -1.3  | 0.31  | 0.0002   | 0.0008 | coiled-coil domain containing 78                                          |
| CCER1    | 3.02  | 0.21  | -1.38 | 2.78E-05 | 0.0003 | coiled-coil glutamate rich protein 1                                      |
| CCL1     | -3.05 | -1.35 | 0.26  | 4.84E-05 | 0.0003 | chemokine (C-C motif) ligand 1                                            |
| CCL2     | 3.3   | 0.32  | -1.4  | 3.89E-06 | 0.0002 | chemokine (C-C motif) ligand 2                                            |
| CCL8     | 3.3   | 0.32  | -1.4  | 7.95E-06 | 0.0002 | chemokine (C-C motif) ligand 8                                            |
| CCNA1    | 3.16  | 0.37  | -1.29 | 2.88E-05 | 0.0003 | cyclin A1                                                                 |
| CCR5     | -3.09 | -1.35 | 0.28  | 1.41E-05 | 0.0002 | chemokine (C-C motif) receptor 5 (gene/pseudogene)                        |
| CCR5     | -3.09 | -1.35 | 0.28  | 1.41E-05 | 0.0002 | chemokine (C-C motif) receptor 5 (gene/pseudogene)                        |
| CCT8L2   | -3.21 | -1.36 | 0.32  | 9.37E-05 | 0.0005 | chaperonin containing TCP1, subunit 8 (theta)-like 2                      |
| CD200R1L | 3.42  | 0.33  | -1.44 | 1.33E-05 | 0.0002 | CD200 receptor 1 like                                                     |
| CD247    | 3.01  | 0.3   | -1.29 | 8.72E-06 | 0.0002 | CD247 molecule                                                            |
| CD320    | -3.01 | -1.31 | 0.28  | 4.19E-06 | 0.0002 | CD320 molecule                                                            |
| CD74     | 3.02  | 0.39  | -1.2  | 9.34E-06 | 0.0002 | CD74 molecule, major histocompatibility complex, class II invariant chain |
| CD82     | 3.37  | 0.32  | -1.43 | 1.68E-05 | 0.0002 | CD82 molecule                                                             |
| CD84     | -3.01 | -1.28 | 0.31  | 5.75E-05 | 0.0004 | CD84 molecule                                                             |
| CD8B     | -3.21 | -1.37 | 0.31  | 2.27E-05 | 0.0002 | CD8b molecule                                                             |
| CD99L2   | 3.4   | 0.38  | -1.38 | 8.21E-06 | 0.0002 | CD99 molecule-like 2                                                      |
| CDC20    | 3.28  | 0.42  | -1.29 | 3.76E-05 | 0.0003 | cell division cycle 20                                                    |
| CDH7     | 3.42  | 0.39  | -1.38 | 1.60E-05 | 0.0002 | cadherin 7, type 2                                                        |
| CDK10    | 3.21  | 0.3   | -1.38 | 6.24E-06 | 0.0002 | cyclin-dependent kinase 10                                                |
| CDK16    | -3.37 | -1.37 | 0.38  | 7.38E-06 | 0.0002 | cyclin-dependent kinase 16                                                |
| CDK18    | -3.05 | -1.28 | 0.33  | 1.03E-05 | 0.0002 | cyclin-dependent kinase 18                                                |
| CDK2AP2  | 3.3   | 0.32  | -1.4  | 3.11E-06 | 0.0002 | cyclin-dependent kinase 2 associated protein 2                            |
| CDK4     | 3.22  | 0.37  | -1.31 | 5.51E-05 | 0.0004 | cyclin-dependent kinase 4                                                 |
| CDK7     | -3.01 | -1.28 | 0.31  | 4.44E-06 | 0.0002 | cyclin-dependent kinase 7                                                 |
| CDK7     | -3.01 | -1.28 | 0.31  | 4.44E-06 | 0.0002 | cyclin-dependent kinase 7                                                 |
| CDKN1A   | -3.01 | -1.32 | 0.27  | 0.0004   | 0.0016 | cyclin-dependent kinase inhibitor 1A (p21, Cip1)                          |
| CDS2     | 3.16  | 0.28  | -1.38 | 0.0001   | 0.0007 | CDP-diacylglycerol synthase 2                                             |
| CDSN     | -3.06 | -1.34 | 0.27  | 7.86E-06 | 0.0002 | corneodesmosin                                                            |
| CDV3     | 3.02  | 0.39  | -1.2  | 6.20E-05 | 0.0004 | CDV3 homolog (mouse)                                                      |
| CDY2A    | 3.42  | 0.39  | -1.38 | 2.96E-06 | 0.0002 | chromodomain protein, Y-linked, 2A; chromodomain protein, Y-linked, 2B    |
| CDY2B    | 3.42  | 0.39  | -1.38 | 4.40E-06 | 0.0002 | chromodomain protein, Y-linked, 2A; chromodomain protein, Y-linked, 2B    |
| CEACAM3  | 3.49  | 0.38  | -1.43 | 6.42E-06 | 0.0002 | carcinoembryonic antigen-related cell adhesion molecule 3                 |

|              |       |       |       |          |        |                                                                                                                                                                                              |
|--------------|-------|-------|-------|----------|--------|----------------------------------------------------------------------------------------------------------------------------------------------------------------------------------------------|
| CEACAM4      | -3.01 | -1.31 | 0.28  | 2.69E-05 | 0.0003 | carcinoembryonic antigen-related cell adhesion molecule 4                                                                                                                                    |
| CEACAM8      | -3.13 | -1.3  | 0.35  | 0.0001   | 0.0007 | carcinoembryonic antigen-related cell adhesion molecule 8                                                                                                                                    |
| CEBPD        | -3.01 | -1.28 | 0.31  | 1.02E-05 | 0.0002 | CCAAT/enhancer binding protein (C/EBP), delta                                                                                                                                                |
| CELF1        | -3.1  | -1.31 | 0.32  | 7.21E-06 | 0.0002 | CUGBP, Elav-like family member 1                                                                                                                                                             |
| CELP; CEL    | -3.13 | -1.38 | 0.26  | 5.74E-05 | 0.0004 | carboxyl ester lipase pseudogene; carboxyl ester lipase                                                                                                                                      |
| CEMP1        | -3.17 | -1.4  | 0.27  | 5.47E-05 | 0.0004 | cementum protein 1                                                                                                                                                                           |
| CEP164       | -3.01 | -1.31 | 0.28  | 2.97E-05 | 0.0003 | centrosomal protein 164kDa                                                                                                                                                                   |
| CEP170B      | -3.16 | -1.38 | 0.28  | 8.00E-06 | 0.0002 | centrosomal protein 170B                                                                                                                                                                     |
| CER1         | 3.1   | 0.43  | -1.2  | 1.32E-05 | 0.0002 | cerberus 1, DAN family BMP antagonist                                                                                                                                                        |
| CERCAM       | 3.19  | 0.47  | -1.2  | 0.0002   | 0.0007 | cerebral endothelial cell adhesion molecule                                                                                                                                                  |
| CERS5        | 3.4   | 0.38  | -1.38 | 1.68E-05 | 0.0002 | ceramide synthase 5                                                                                                                                                                          |
| CES1P1; CES1 | -3.06 | -1.31 | 0.3   | 8.76E-05 | 0.0005 | carboxylesterase 1 pseudogene 1; carboxylesterase 1                                                                                                                                          |
| CES5A        | -3.06 | -1.33 | 0.28  | 1.30E-05 | 0.0002 | carboxylesterase 5A                                                                                                                                                                          |
| CETP         | -3.22 | -1.36 | 0.32  | 2.39E-05 | 0.0002 | cholesteryl ester transfer protein, plasma                                                                                                                                                   |
| CFAP100      | -3.01 | -1.31 | 0.28  | 3.38E-05 | 0.0003 | cilia and flagella associated protein 100                                                                                                                                                    |
| CFAP45       | -3.15 | -1.33 | 0.32  | 9.40E-06 | 0.0002 | cilia and flagella associated protein 45                                                                                                                                                     |
| CFAP61       | -3.01 | -1.31 | 0.28  | 4.11E-05 | 0.0003 | cilia and flagella associated protein 61                                                                                                                                                     |
| CFAP77       | 3.4   | 0.35  | -1.41 | 2.59E-05 | 0.0003 | cilia and flagella associated protein 77                                                                                                                                                     |
| CFAP97       | 3     | 0.25  | -1.34 | 1.46E-05 | 0.0002 | cilia and flagella associated protein 97                                                                                                                                                     |
| CFHR1        | -3.36 | -1.37 | 0.38  | 3.74E-05 | 0.0003 | complement factor H-related 1                                                                                                                                                                |
| CFHR3        | -3.14 | -1.37 | 0.28  | 2.58E-05 | 0.0003 | complement factor H-related 3                                                                                                                                                                |
| CFHR4        | 3.62  | 0.43  | -1.43 | 0.0002   | 0.0010 | complement factor H-related 4                                                                                                                                                                |
| CGB2         | -3.01 | -1.28 | 0.31  | 0.0003   | 0.0011 | chorionic gonadotropin, beta polypeptide 2                                                                                                                                                   |
| CGB5         | -3.04 | -1.31 | 0.29  | 0.0002   | 0.0008 | chorionic gonadotropin, beta polypeptide 5; chorionic gonadotropin, beta polypeptide 1; chorionic gonadotropin, beta polypeptide 2                                                           |
| CGB7         | -3.02 | -1.28 | 0.32  | 6.53E-05 | 0.0004 | chorionic gonadotropin, beta polypeptide 5; chorionic gonadotropin, beta polypeptide 7; chorionic gonadotropin, beta polypeptide 2; neurotrophin 4; chorionic gonadotropin, beta polypeptide |
| CGRRF1       | 3.23  | 0.29  | -1.4  | 9.22E-06 | 0.0002 | cell growth regulator with ring finger domain 1                                                                                                                                              |
| MORC3        | -3.15 | -1.38 | 0.27  | 2.33E-05 | 0.0002 | chromatin assembly factor 1, subunit B (p60); MORC family CW-type zinc finger 3                                                                                                              |
| CHGB         | 3.47  | 0.32  | -1.47 | 6.56E-06 | 0.0002 | chromogranin B                                                                                                                                                                               |
| CHORDC1      | 3.51  | 0.32  | -1.49 | 1.48E-05 | 0.0002 | cysteine and histidine rich domain containing 1                                                                                                                                              |
| CHPF         | -3.19 | -1.37 | 0.3   | 3.13E-05 | 0.0003 | chondroitin polymerizing factor                                                                                                                                                              |
| CHRM3        | 3.55  | 0.39  | -1.44 | 7.11E-06 | 0.0002 | cholinergic receptor, muscarinic 3                                                                                                                                                           |
| CHST12       | -3.06 | -1.28 | 0.34  | 0.0007   | 0.0026 | carbohydrate (chondroitin 4) sulfotransferase 12                                                                                                                                             |
| CHST5        | -3.55 | -1.36 | 0.47  | 0.0003   | 0.0013 | carbohydrate (N-acetylglucosamine 6-O) sulfotransferase 5                                                                                                                                    |
| CHST6        | -3.41 | -1.36 | 0.4   | 3.73E-05 | 0.0003 | carbohydrate (N-acetylglucosamine 6-O) sulfotransferase 6                                                                                                                                    |
| CHST8        | 3.01  | 0.3   | -1.29 | 1.19E-05 | 0.0002 | carbohydrate (N-acetylgalactosamine 4-O) sulfotransferase 8                                                                                                                                  |
| CHTF18       | -3.13 | -1.31 | 0.33  | 4.64E-06 | 0.0002 | chromosome transmission fidelity factor 18                                                                                                                                                   |
| CKAP2L       | 3.08  | 0.32  | -1.3  | 4.93E-06 | 0.0002 | cytoskeleton associated protein 2-like                                                                                                                                                       |
| CKS1B        | -3.09 | -1.28 | 0.35  | 1.73E-05 | 0.0002 | CDC28 protein kinase regulatory subunit 1B                                                                                                                                                   |

|         |       |       |       |          |        |                                                                                                                              |
|---------|-------|-------|-------|----------|--------|------------------------------------------------------------------------------------------------------------------------------|
| CLDN15  | -3.15 | -1.34 | 0.32  | 1.77E-05 | 0.0002 | claudin 15                                                                                                                   |
| CLEC18A | -3.01 | -1.31 | 0.28  | 1.19E-05 | 0.0002 | C-type lectin domain family 18, member A; C-type lectin domain family 18, member B; C-type lectin domain family 18, member C |
| CLEC2B  | 3.52  | 0.36  | -1.46 | 8.26E-06 | 0.0002 | C-type lectin domain family 2, member B                                                                                      |
| EXOSC7  | 3.04  | 0.19  | -1.41 | 4.28E-06 | 0.0002 | C-type lectin domain family 3, member B; exosome component 7                                                                 |
| CLECL1  | -3.01 | -1.31 | 0.28  | 2.69E-05 | 0.0003 | C-type lectin-like 1                                                                                                         |
| CLIP2   | 3.06  | 0.41  | -1.2  | 1.67E-05 | 0.0002 | CAP-GLY domain containing linker protein 2                                                                                   |
| CLIP4   | -3.2  | -1.43 | 0.25  | 6.41E-05 | 0.0004 | CAP-GLY domain containing linker protein family, member 4                                                                    |
| PPIL3   | -3.17 | -1.36 | 0.3   | 2.18E-05 | 0.0002 | CDC like kinase 1; peptidylprolyl isomerase (cyclophilin)-like 3                                                             |
| CLLU1   | -3.07 | -1.38 | 0.23  | 2.81E-05 | 0.0003 | chronic lymphocytic leukemia up-regulated 1                                                                                  |
| CLN8    | -3.16 | -1.4  | 0.26  | 0.0001   | 0.0007 | ceroid-lipofuscinosis, neuronal 8                                                                                            |
| CLPTM1  | 3.12  | 0.44  | -1.2  | 0.0001   | 0.0006 | cleft lip and palate associated transmembrane protein 1                                                                      |
| CLRN2   | -3.08 | -1.28 | 0.34  | 8.76E-06 | 0.0002 | clarin 2                                                                                                                     |
| CLU     | -3.23 | -1.38 | 0.31  | 5.37E-05 | 0.0004 | clusterin                                                                                                                    |
| CLYBL   | -3.06 | -1.38 | 0.23  | 9.86E-05 | 0.0005 | citrate lyase beta like                                                                                                      |
| CMA1    | -3.11 | -1.31 | 0.32  | 3.12E-06 | 0.0002 | chymase 1, mast cell                                                                                                         |
| CNTNAP5 | -3.22 | -1.35 | 0.34  | 1.17E-05 | 0.0002 | contactin associated protein-like 5                                                                                          |
| COL13A1 | -3.06 | -1.33 | 0.28  | 1.31E-05 | 0.0002 | collagen, type XIII, alpha 1                                                                                                 |
| COL18A1 | -3.03 | -1.28 | 0.32  | 4.12E-05 | 0.0003 | collagen, type XVIII, alpha 1                                                                                                |
| COL21A1 | -3.01 | -1.31 | 0.28  | 1.28E-05 | 0.0002 | collagen, type XXI, alpha 1                                                                                                  |
| COL6A2  | 3.22  | 0.4   | -1.29 | 1.10E-05 | 0.0002 | collagen, type VI, alpha 2                                                                                                   |
| COLEC11 | 3.02  | 0.39  | -1.2  | 6.44E-05 | 0.0004 | collectin subfamily member 11                                                                                                |
| COPA    | 3.04  | 0.2   | -1.4  | 2.62E-05 | 0.0003 | coatomer protein complex subunit alpha                                                                                       |
| COQ7    | -3.12 | -1.36 | 0.28  | 7.02E-06 | 0.0002 | coenzyme Q7 homolog, ubiquinone (yeast)                                                                                      |
| CORO1A  | -3.15 | -1.39 | 0.27  | 4.24E-05 | 0.0003 | coronin, actin binding protein, 1A                                                                                           |
| CORO2A  | -3.12 | -1.36 | 0.28  | 8.37E-06 | 0.0002 | coronin, actin binding protein, 2A                                                                                           |
| CORO2B  | 3.06  | 0.32  | -1.29 | 0.0001   | 0.0006 | coronin, actin binding protein, 2B                                                                                           |
| CORO6   | -3.16 | -1.3  | 0.37  | 4.58E-06 | 0.0002 | coronin 6                                                                                                                    |
| COX11   | -3.03 | -1.33 | 0.27  | 1.96E-05 | 0.0002 | COX11 cytochrome c oxidase copper chaperone                                                                                  |
| COX7B2  | -3.33 | -1.41 | 0.32  | 4.64E-05 | 0.0003 | cytochrome c oxidase subunit VIIb2                                                                                           |
| CPA2    | -3.36 | -1.38 | 0.36  | 1.39E-05 | 0.0002 | carboxypeptidase A2 (pancreatic)                                                                                             |
| CPEB1   | -3.01 | -1.34 | 0.25  | 1.79E-05 | 0.0002 | cytoplasmic polyadenylation element binding protein 1                                                                        |
| CPLX1   | -3.01 | -1.31 | 0.28  | 1.19E-05 | 0.0002 | complexin 1                                                                                                                  |
| CPLX3   | -3.11 | -1.31 | 0.32  | 1.07E-05 | 0.0002 | complexin 3; lectin, mannose-binding, 1 like                                                                                 |
| CPO     | -3.17 | -1.38 | 0.28  | 4.36E-05 | 0.0003 | carboxypeptidase O                                                                                                           |
| CPSF3L  | -3.33 | -1.41 | 0.32  | 7.10E-05 | 0.0004 | cleavage and polyadenylation specific factor 3-like                                                                          |
| CPSF7   | -3.11 | -1.32 | 0.32  | 6.94E-05 | 0.0004 | cleavage and polyadenylation specific factor 7                                                                               |
| CR2     | 3.42  | 0.39  | -1.38 | 3.28E-05 | 0.0003 | complement component (3d/Epstein Barr virus) receptor 2                                                                      |
| CREBRF  | -3.15 | -1.3  | 0.36  | 2.78E-05 | 0.0003 | CREB3 regulatory factor                                                                                                      |

|           |       |       |       |          |        |                                                                                   |
|-----------|-------|-------|-------|----------|--------|-----------------------------------------------------------------------------------|
| CRELD1    | 3.08  | 0.32  | -1.3  | 1.10E-05 | 0.0002 | cysteine rich with EGF-like domains 1                                             |
| CRLF1     | -3.2  | -1.33 | 0.35  | 0.0001   | 0.0006 | cytokine receptor-like factor 1                                                   |
| CRLF2     | 3.3   | 0.32  | -1.4  | 1.09E-05 | 0.0002 | cytokine receptor-like factor 2                                                   |
| CRMP1     | -3.06 | -1.31 | 0.3   | 1.16E-05 | 0.0002 | collapsin response mediator protein 1                                             |
| CROCCP3   | -3.01 | -1.31 | 0.28  | 7.70E-05 | 0.0005 | ciliary rootlet coiled-coil, rootletin pseudogene 3                               |
| CRTC3     | -3.14 | -1.38 | 0.27  | 2.27E-05 | 0.0002 | CREB regulated transcription coactivator 3                                        |
| CRY1      | 3.03  | 0.16  | -1.44 | 1.41E-05 | 0.0002 | cryptochrome circadian clock 1                                                    |
| CRYAA     | -3.01 | -1.32 | 0.27  | 2.57E-05 | 0.0003 | crystallin alpha A                                                                |
| CRYAB     | 3.01  | 0.39  | -1.2  | 1.35E-05 | 0.0002 | crystallin alpha B                                                                |
| CRYBB2    | -3.02 | -1.31 | 0.28  | 2.95E-05 | 0.0003 | crystallin beta B2                                                                |
| CSAG1     | -3.16 | -1.36 | 0.3   | 5.44E-06 | 0.0002 | chondrosarcoma associated gene 1                                                  |
| CSF2RB    | -3.13 | -1.28 | 0.36  | 3.48E-05 | 0.0003 | colony stimulating factor 2 receptor, beta, low-affinity (granulocyte-macrophage) |
| CSNK1A1P1 | 3.37  | 0.32  | -1.43 | 4.28E-06 | 0.0002 | casein kinase 1, alpha 1 pseudogene 1                                             |
| CSNK1E    | -3.06 | -1.33 | 0.28  | 3.81E-05 | 0.0003 | casein kinase 1, epsilon                                                          |
| CSNK1G2   | 3.41  | 0.39  | -1.38 | 8.84E-06 | 0.0002 | casein kinase 1, gamma 2                                                          |
| CSNK2B    | -3.04 | -1.31 | 0.29  | 2.88E-05 | 0.0003 | casein kinase 2, beta polypeptide; lymphocyte antigen 6 complex, locus G5B        |
| LY6G5B    | -3.04 | -1.31 | 0.29  | 2.88E-05 | 0.0003 | casein kinase 2, beta polypeptide; lymphocyte antigen 6 complex, locus G5B        |
| CSNK2B    | -3.08 | -1.32 | 0.3   | 3.12E-05 | 0.0003 | casein kinase 2, beta polypeptide; lymphocyte antigen 6 complex, locus G5B        |
| CSPG4P5   | 3.67  | 0.43  | -1.44 | 6.33E-05 | 0.0004 | chondroitin sulfate proteoglycan 4 pseudogene 5                                   |
| CSPG5     | 3.35  | 0.45  | -1.29 | 4.74E-05 | 0.0003 | chondroitin sulfate proteoglycan 5 (neuroglycan C)                                |
| CST5      | 3.44  | 0.34  | -1.44 | 4.25E-05 | 0.0003 | cystatin D                                                                        |
| CSTB      | 3.36  | 0.28  | -1.47 | 1.41E-05 | 0.0002 | cystatin B (stefin B)                                                             |
| CTAGE10P  | -3.22 | -1.35 | 0.34  | 3.84E-05 | 0.0003 | CTAGE family, member 10, pseudogene                                               |
| CTAGE7P   | 3.74  | 0.43  | -1.47 | 0.0001   | 0.0007 | CTAGE family, member 7, pseudogene                                                |
| CTGF      | 3.3   | 0.52  | -1.2  | 9.56E-06 | 0.0002 | connective tissue growth factor                                                   |
| CTRB1     | 3.25  | 0.32  | -1.38 | 8.77E-06 | 0.0002 | chymotrypsinogen B1                                                               |
| CTRB2     | 3.17  | 0.29  | -1.38 | 7.40E-06 | 0.0002 | chymotrypsinogen B2; chymotrypsinogen B1                                          |
| CTSE      | -3.01 | -1.31 | 0.28  | 1.36E-05 | 0.0002 | cathepsin E                                                                       |
| CTSH      | 3.51  | 0.43  | -1.38 | 3.07E-05 | 0.0003 | cathepsin H                                                                       |
| CTSZ      | 3.55  | 0.42  | -1.4  | 2.01E-05 | 0.0002 | cathepsin Z                                                                       |
| CTXN1     | -3.45 | -1.38 | 0.4   | 0.0004   | 0.0017 | cortexin 1                                                                        |
| CUL7      | 3.2   | 0.39  | -1.29 | 2.98E-05 | 0.0003 | cullin 7                                                                          |
| CWH43     | -3.12 | -1.36 | 0.28  | 1.21E-05 | 0.0002 | cell wall biogenesis 43 C-terminal homolog                                        |
| CXCL17    | 3.18  | 0.38  | -1.29 | 5.40E-06 | 0.0002 | chemokine (C-X-C motif) ligand 17                                                 |
| CXCL2     | -3.03 | -1.31 | 0.29  | 1.17E-05 | 0.0002 | chemokine (C-X-C motif) ligand 2                                                  |
| CXorf56   | -3.07 | -1.35 | 0.27  | 9.61E-05 | 0.0005 | chromosome X open reading frame 56                                                |
| CYB5B     | -3.23 | -1.35 | 0.34  | 1.55E-05 | 0.0002 | cytochrome b5 type B (outer mitochondrial membrane)                               |
| CYBA      | -3.14 | -1.33 | 0.32  | 3.28E-05 | 0.0003 | cytochrome b-245, alpha polypeptide                                               |



|                |       |       |       |          |        |                                                                                                    |
|----------------|-------|-------|-------|----------|--------|----------------------------------------------------------------------------------------------------|
| CYP11A1        | 3.49  | 0.41  | -1.39 | 2.31E-06 | 0.0002 | cytochrome P450, family 11, subfamily A, polypeptide 1                                             |
| CYP2B7P        | 3.5   | 0.36  | -1.45 | 2.76E-06 | 0.0002 | cytochrome P450, family 2, subfamily B, polypeptide 7, pseudogene                                  |
| CYP4F11        | -3    | -1.32 | 0.26  | 0.0001   | 0.0006 | cytochrome P450, family 4, subfamily F, polypeptide 11                                             |
| CYP4F29P       | 3.44  | 0.36  | -1.43 | 4.33E-05 | 0.0003 | cytochrome P450, family 4, subfamily F, polypeptide 29, pseudogene                                 |
| CYP4Z2P        | 3.35  | 0.36  | -1.38 | 1.48E-05 | 0.0002 | cytochrome P450, family 4, subfamily Z, polypeptide 2, pseudogene                                  |
| CYP7B1         | 3.11  | 0.21  | -1.43 | 5.17E-05 | 0.0004 | cytochrome P450, family 7, subfamily B, polypeptide 1                                              |
| CYTL1          | 3     | 0.18  | -1.4  | 3.46E-05 | 0.0003 | cytokine like 1                                                                                    |
| DAAM1          | -3.22 | -1.31 | 0.38  | 2.50E-05 | 0.0002 | dishevelled associated activator of morphogenesis 1                                                |
| DACT2          | 3.51  | 0.4   | -1.41 | 1.19E-05 | 0.0002 | dishevelled-binding antagonist of beta-catenin 2                                                   |
| DAO            | 3.3   | 0.32  | -1.4  | 1.49E-05 | 0.0002 | D-amino-acid oxidase                                                                               |
| DAW1           | -3.14 | -1.3  | 0.36  | 3.42E-05 | 0.0003 | dynein assembly factor with WDR repeat domains 1                                                   |
| DBF4B          | 3.04  | 0.16  | -1.44 | 5.09E-06 | 0.0002 | DBF4 zinc finger B                                                                                 |
| DBH            | 3.1   | 0.23  | -1.4  | 1.03E-05 | 0.0002 | dopamine beta-hydroxylase (dopamine beta-monooxygenase)                                            |
| DBN1           | -3.01 | -1.31 | 0.28  | 1.45E-05 | 0.0002 | drebrin 1                                                                                          |
| DBX2           | -3.09 | -1.38 | 0.24  | 4.99E-05 | 0.0003 | developing brain homeobox 2                                                                        |
| DCAF8          | 3.1   | 0.25  | -1.38 | 5.83E-06 | 0.0002 | DDB1 and CUL4 associated factor 8                                                                  |
| DCD            | -3.04 | -1.38 | 0.22  | 0.0002   | 0.0007 | dermcidin                                                                                          |
| DCDC1          | -3.04 | -1.28 | 0.32  | 1.06E-05 | 0.0002 | doublecortin domain containing 1                                                                   |
| DCTN4          | -3.01 | -1.31 | 0.28  | 6.21E-06 | 0.0002 | dynactin 4 (p62)                                                                                   |
| ERI2           | -3.15 | -1.38 | 0.27  | 1.26E-05 | 0.0002 | DCN1, defective in cullin neddylation 1, domain containing 3; ERI1 exoribonuclease family member 2 |
| DCUN1D4        | 3.26  | 0.32  | -1.38 | 1.13E-05 | 0.0002 | DCN1, defective in cullin neddylation 1, domain containing 4                                       |
| DCXR           | -3.06 | -1.33 | 0.28  | 6.30E-05 | 0.0004 | dicarbonyl/L-xylulose reductase                                                                    |
| DDB2           | -3.1  | -1.31 | 0.32  | 0.0001   | 0.0007 | damage-specific DNA binding protein 2                                                              |
| DDC-AS1        | -3.04 | -1.31 | 0.29  | 1.31E-05 | 0.0002 | DDC antisense RNA 1                                                                                |
| DDI1           | -3.06 | -1.33 | 0.28  | 3.76E-05 | 0.0003 | DNA-damage inducible 1 homolog 1                                                                   |
| DDX51          | -3.01 | -1.31 | 0.28  | 7.91E-06 | 0.0002 | DEAD (Asp-Glu-Ala-Asp) box polypeptide 51                                                          |
| DEFB123        | -3.31 | -1.28 | 0.45  | 0.0002   | 0.0010 | defensin, beta 123                                                                                 |
| DEFB128        | -3.08 | -1.36 | 0.26  | 3.80E-05 | 0.0003 | defensin, beta 128                                                                                 |
| DEFB4A         | -3.12 | -1.36 | 0.28  | 0.0002   | 0.0007 | defensin, beta 4A; defensin, beta 4B                                                               |
| DEFB4A; DEFB4B | -3.12 | -1.36 | 0.28  | 0.0002   | 0.0007 | defensin, beta 4A; defensin, beta 4B                                                               |
| DENND1C        | -3.01 | -1.31 | 0.28  | 8.41E-05 | 0.0005 | DENN/MADD domain containing 1C                                                                     |
| DESI2          | -3.06 | -1.31 | 0.3   | 6.22E-06 | 0.0002 | desumoylating isopeptidase 2                                                                       |
| DGAT2L6        | -3.38 | -1.41 | 0.34  | 1.08E-05 | 0.0002 | diacylglycerol O-acyltransferase 2-like 6                                                          |
| DGCR6          | 3.63  | 0.43  | -1.43 | 2.34E-06 | 0.0002 | DiGeorge syndrome critical region gene 6                                                           |
| DGKA           | -3.16 | -1.38 | 0.28  | 1.01E-05 | 0.0002 | diacylglycerol kinase alpha                                                                        |
| DGUOK          | 3.41  | 0.32  | -1.44 | 4.58E-05 | 0.0003 | deoxyguanosine kinase                                                                              |
| DHRS2          | 3.52  | 0.43  | -1.38 | 0.0003   | 0.0014 | dehydrogenase/reductase (SDR family) member 2                                                      |
| DHRS3          | -3.13 | -1.3  | 0.35  | 9.90E-06 | 0.0002 | dehydrogenase/reductase (SDR family) member 3                                                      |

|               |       |       |       |          |        |                                                                          |
|---------------|-------|-------|-------|----------|--------|--------------------------------------------------------------------------|
| DHTKD1        | 3.49  | 0.42  | -1.38 | 9.99E-06 | 0.0002 | dehydrogenase E1 and transketolase domain containing 1                   |
| DHX16         | -3.04 | -1.28 | 0.32  | 9.13E-06 | 0.0002 | DEAH (Asp-Glu-Ala-His) box polypeptide 16                                |
| DHX29         | -3.03 | -1.28 | 0.32  | 1.07E-05 | 0.0002 | DEAH (Asp-Glu-Ala-His) box polypeptide 29                                |
| DHX58         | 3.03  | 0.4   | -1.2  | 4.05E-06 | 0.0002 | DEXH (Asp-Glu-X-His) box polypeptide 58                                  |
| DIP2A         | 3.04  | 0.31  | -1.29 | 7.66E-06 | 0.0002 | disco-interacting protein 2 homolog A                                    |
| DIRAS1        | -3.16 | -1.28 | 0.38  | 3.29E-06 | 0.0002 | DIRAS family, GTP-binding RAS-like 1                                     |
| DIRC2         | 3.17  | 0.22  | -1.44 | 4.02E-05 | 0.0003 | disrupted in renal carcinoma 2                                           |
| DISP2         | 3.3   | 0.3   | -1.43 | 4.57E-05 | 0.0003 | dispatched homolog 2 (Drosophila)                                        |
| DKC1; SNORA56 | -3.12 | -1.36 | 0.28  | 8.37E-06 | 0.0002 | dyskeratosis congenita 1, dyskerin; small nucleolar RNA, H/ACA box 56    |
| DKKL1         | 3.55  | 0.39  | -1.44 | 3.07E-06 | 0.0002 | dickkopf-like 1                                                          |
| DLC1          | -3.01 | -1.31 | 0.28  | 1.61E-05 | 0.0002 | DLC1 Rho GTPase activating protein                                       |
| DLEU2         | -3.13 | -1.32 | 0.32  | 6.42E-06 | 0.0002 | deleted in lymphocytic leukemia 2 (non-protein coding)                   |
| DLEU7         | -3.13 | -1.28 | 0.36  | 1.29E-05 | 0.0002 | deleted in lymphocytic leukemia, 7                                       |
| DLGAP3        | -3.03 | -1.32 | 0.28  | 1.59E-05 | 0.0002 | discs, large (Drosophila) homolog-associated protein 3                   |
| DLK1          | 3.03  | 0.29  | -1.31 | 4.98E-05 | 0.0003 | delta-like 1 homolog (Drosophila)                                        |
| DLL1          | -3.01 | -1.35 | 0.24  | 1.19E-05 | 0.0002 | delta-like 1 (Drosophila)                                                |
| DLX5          | 3.5   | 0.43  | -1.38 | 3.79E-05 | 0.0003 | distal-less homeobox 5                                                   |
| DNAH12        | 3.26  | 0.28  | -1.43 | 4.95E-06 | 0.0002 | dynein, axonemal, heavy chain 12                                         |
| DNAI2         | -3.19 | -1.38 | 0.29  | 4.15E-05 | 0.0003 | dynein, axonemal, intermediate chain 2                                   |
| DNAJA1        | 3.52  | 0.43  | -1.38 | 2.57E-06 | 0.0002 | DnaJ (Hsp40) homolog, subfamily A, member 1                              |
| DNAJB13       | 3.26  | 0.3   | -1.4  | 4.42E-06 | 0.0002 | DnaJ (Hsp40) homolog, subfamily B, member 13                             |
| DNAJC19       | -3.07 | -1.36 | 0.26  | 0.0007   | 0.0027 | DnaJ (Hsp40) homolog, subfamily C, member 19                             |
| DNAJC30       | 3.42  | 0.39  | -1.38 | 1.98E-05 | 0.0002 | DnaJ (Hsp40) homolog, subfamily C, member 30                             |
| DNLZ; CARD9   | 3.1   | 0.43  | -1.2  | 4.02E-06 | 0.0002 | DNL-type zinc finger; caspase recruitment domain family, member 9        |
| DNM1          | 3.3   | 0.32  | -1.4  | 3.89E-06 | 0.0002 | dynamain 1                                                               |
| DNTT          | -3.31 | -1.36 | 0.36  | 3.80E-05 | 0.0003 | DNA nucleotidylexotransferase                                            |
| DOK1          | 3.02  | 0.39  | -1.2  | 9.34E-06 | 0.0002 | docking protein 1                                                        |
| DPH7          | -3.05 | -1.4  | 0.21  | 1.90E-05 | 0.0002 | diphthamide biosynthesis 7                                               |
| DPM2          | 3.56  | 0.43  | -1.4  | 7.61E-06 | 0.0002 | dolichyl-phosphate mannosyltransferase polypeptide 2, regulatory subunit |
| DPP3          | -3.14 | -1.37 | 0.28  | 3.59E-06 | 0.0002 | dipeptidyl-peptidase 3                                                   |
| DPP7          | -3.22 | -1.36 | 0.32  | 4.23E-06 | 0.0002 | dipeptidyl-peptidase 7                                                   |
| DPY19L1       | -3.07 | -1.36 | 0.26  | 9.63E-06 | 0.0002 | dpy-19-like 1 (C. elegans)                                               |
| DPYSL2        | 3.03  | 0.15  | -1.44 | 1.01E-05 | 0.0002 | dihydropyrimidinase-like 2                                               |
| DRAM2         | 3.15  | 0.21  | -1.44 | 3.61E-06 | 0.0002 | DNA-damage regulated autophagy modulator 2                               |
| DRD5          | 3.02  | 0.39  | -1.2  | 5.22E-06 | 0.0002 | dopamine receptor D5                                                     |
| DRD5P2        | -3.12 | -1.36 | 0.28  | 2.52E-05 | 0.0003 | dopamine receptor D5 pseudogene 2                                        |
| DRGX          | -3.09 | -1.35 | 0.28  | 0.0002   | 0.0009 | dorsal root ganglia homeobox                                             |
| DSEL          | -3.07 | -1.3  | 0.32  | 2.88E-05 | 0.0003 | dermatan sulfate epimerase-like                                          |

|                  |       |       |       |          |        |                                                                    |
|------------------|-------|-------|-------|----------|--------|--------------------------------------------------------------------|
| DSG3             | 3.34  | 0.34  | -1.4  | 7.22E-06 | 0.0002 | desmoglein 3                                                       |
| DTD2             | 3.75  | 0.46  | -1.44 | 5.03E-06 | 0.0002 | D-tyrosyl-tRNA deacylase 2 (putative)                              |
| DUOXA1           | -3.11 | -1.28 | 0.36  | 1.15E-05 | 0.0002 | dual oxidase maturation factor 1                                   |
| DUOXA2           | 3.1   | 0.43  | -1.2  | 4.42E-05 | 0.0003 | dual oxidase maturation factor 2                                   |
| DUSP5            | 3.26  | 0.32  | -1.38 | 9.64E-05 | 0.0005 | dual specificity phosphatase 5                                     |
| DYDC2            | -3.23 | -1.38 | 0.31  | 8.42E-05 | 0.0005 | DPY30 domain containing 2                                          |
| DYNC1I1          | -3.04 | -1.4  | 0.21  | 7.39E-06 | 0.0002 | dynein, cytoplasmic 1, intermediate chain 1                        |
| E2F2             | -3.03 | -1.31 | 0.29  | 6.18E-05 | 0.0004 | E2F transcription factor 2                                         |
| EAPP             | -3.04 | -1.38 | 0.22  | 2.90E-05 | 0.0003 | E2F-associated phosphoprotein                                      |
| EARS2            | 3.3   | 0.32  | -1.4  | 6.54E-06 | 0.0002 | glutamyl-tRNA synthetase 2, mitochondrial                          |
| EBI3             | 3.13  | 0.45  | -1.2  | 1.07E-05 | 0.0002 | Epstein-Barr virus induced 3                                       |
| ECM1             | 3.49  | 0.38  | -1.43 | 6.69E-06 | 0.0002 | extracellular matrix protein 1                                     |
| EDAR             | -3.01 | -1.31 | 0.28  | 7.03E-05 | 0.0004 | ectodysplasin A receptor                                           |
| EFEMP2           | 3.15  | 0.46  | -1.2  | 4.47E-06 | 0.0002 | EGF containing fibulin-like extracellular matrix protein 2         |
| EGLN1            | 3.16  | 0.28  | -1.38 | 5.49E-06 | 0.0002 | egl-9 family hypoxia-inducible factor 1                            |
| EGR3             | -3.15 | -1.37 | 0.28  | 4.68E-06 | 0.0002 | early growth response 3                                            |
| EHD3             | 3.19  | 0.47  | -1.2  | 0.0002   | 0.0009 | EH domain containing 3                                             |
| EHMT1-IT1        | -3.01 | -1.31 | 0.28  | 3.95E-05 | 0.0003 | EHMT1 intronic transcript 1                                        |
| EIF2B2           | -3.18 | -1.38 | 0.29  | 2.49E-05 | 0.0002 | eukaryotic translation initiation factor 2B, subunit 2 beta, 39kDa |
| EIF2S2           | -3.37 | -1.36 | 0.39  | 0.0002   | 0.0010 | eukaryotic translation initiation factor 2, subunit 2 beta, 38kDa  |
| EIF3J            | -3.12 | -1.36 | 0.28  | 2.39E-05 | 0.0002 | eukaryotic translation initiation factor 3, subunit J              |
| EIF3L            | -3.06 | -1.33 | 0.28  | 0.0002   | 0.0011 | eukaryotic translation initiation factor 3, subunit L              |
| EIF4E1B          | -3.2  | -1.31 | 0.36  | 0.0003   | 0.0011 | eukaryotic translation initiation factor 4E family member 1B       |
| EIF4G3           | 3.16  | 0.28  | -1.38 | 2.41E-05 | 0.0002 | eukaryotic translation initiation factor 4 gamma, 3                |
| EIF4H            | -3.07 | -1.32 | 0.3   | 5.55E-06 | 0.0002 | eukaryotic translation initiation factor 4H                        |
| ELMSAN1          | 3.1   | 0.43  | -1.2  | 6.29E-06 | 0.0002 | ELM2 and Myb/SANT-like domain containing 1                         |
| EMILIN2          | 3.15  | 0.28  | -1.38 | 3.71E-06 | 0.0002 | elastin microfibril interfacer 2                                   |
| EMILIN3          | 3.3   | 0.32  | -1.4  | 6.98E-06 | 0.0002 | elastin microfibril interfacer 3                                   |
| EMP3             | -3.05 | -1.33 | 0.28  | 1.21E-05 | 0.0002 | epithelial membrane protein 3                                      |
| ENDOG            | -3.37 | -1.31 | 0.44  | 1.24E-05 | 0.0002 | endonuclease G                                                     |
| ENO1             | 3.41  | 0.32  | -1.44 | 1.41E-05 | 0.0002 | enolase 1, (alpha)                                                 |
| ENPEP            | 3.41  | 0.32  | -1.44 | 3.84E-05 | 0.0003 | glutamyl aminopeptidase (aminopeptidase A)                         |
| ENTPD5           | 3.26  | 0.32  | -1.38 | 3.38E-05 | 0.0003 | ectonucleoside triphosphate diphosphohydrolase 5                   |
| EPHB2            | 3.36  | 0.32  | -1.43 | 1.37E-05 | 0.0002 | EPH receptor B2                                                    |
| EPHB4            | 3.16  | 0.37  | -1.29 | 2.07E-05 | 0.0002 | EPH receptor B4                                                    |
| EPHX3            | 3.02  | 0.39  | -1.2  | 1.08E-05 | 0.0002 | epoxide hydrolase 3                                                |
| 'PIN-WFDC6; WFDI | -3.04 | -1.3  | 0.31  | 1.69E-05 | 0.0002 | EPPIN-WFDC6 readthrough; WAP four-disulfide core domain 6          |
| EPWW6493         | -3.18 | -1.34 | 0.33  | 0.0001   | 0.0006 | uncharacterized LOC100129831                                       |

|                  |       |       |       |          |        |                                                                                                                  |
|------------------|-------|-------|-------|----------|--------|------------------------------------------------------------------------------------------------------------------|
| ERAS             | -3.06 | -1.37 | 0.24  | 4.83E-05 | 0.0003 | ES cell expressed Ras                                                                                            |
| ERC2-IT1         | 3.36  | 0.32  | -1.43 | 5.86E-05 | 0.0004 | ERC2 intronic transcript 1                                                                                       |
| ERCC5; BIVM-ERCC | 3.39  | 0.32  | -1.44 | 5.47E-06 | 0.0002 | excision repair cross-complementation group 5; BIVM-ERCC5 readthrough                                            |
| ERF              | -3.2  | -1.31 | 0.36  | 9.78E-06 | 0.0002 | Ets2 repressor factor                                                                                            |
| ERG              | 3.37  | 0.32  | -1.43 | 8.46E-06 | 0.0002 | v-ets avian erythroblastosis virus E26 oncogene homolog                                                          |
| ERH              | -3.09 | -1.4  | 0.23  | 0.0001   | 0.0007 | enhancer of rudimentary homolog (Drosophila)                                                                     |
| ERI3             | -3.04 | -1.28 | 0.32  | 6.83E-06 | 0.0002 | ERI1 exoribonuclease family member 3                                                                             |
| ERVH48-1         | -3.11 | -1.28 | 0.36  | 1.00E-05 | 0.0002 | endogenous retrovirus group 48, member 1                                                                         |
| ERVK13-1         | -3.18 | -1.35 | 0.32  | 2.17E-05 | 0.0002 | endogenous retrovirus group K13, member 1                                                                        |
| ESPNP            | 3.41  | 0.32  | -1.44 | 0.0005   | 0.0020 | espin pseudogene                                                                                                 |
| ESR1             | 3.49  | 0.41  | -1.39 | 5.64E-05 | 0.0004 | estrogen receptor 1                                                                                              |
| ETHE1            | 3.44  | 0.34  | -1.44 | 7.00E-06 | 0.0002 | ethylmalonic encephalopathy 1                                                                                    |
| ETV6             | -3.24 | -1.33 | 0.36  | 6.20E-06 | 0.0002 | ets variant 6                                                                                                    |
| EVC              | -3.04 | -1.28 | 0.32  | 1.15E-05 | 0.0002 | Ellis van Creveld protein                                                                                        |
| EVX1             | 3.37  | 0.32  | -1.43 | 1.40E-05 | 0.0002 | even-skipped homeobox 1                                                                                          |
| EVX2             | 3.39  | 0.36  | -1.4  | 2.87E-06 | 0.0002 | even-skipped homeobox 2                                                                                          |
| EXD3             | -3.07 | -1.34 | 0.28  | 1.20E-05 | 0.0002 | exonuclease 3-5 domain containing 3                                                                              |
| EXO1             | 3.49  | 0.38  | -1.43 | 3.31E-06 | 0.0002 | exonuclease 1                                                                                                    |
| EXTL3            | 3.06  | 0.32  | -1.29 | 1.30E-05 | 0.0002 | exostosin-like glycosyltransferase 3                                                                             |
| F8A2; F8A3; F8A1 | -3.04 | -1.28 | 0.32  | 8.29E-06 | 0.0002 | coagulation factor VIII-associated 2; coagulation factor VIII-associated 3; coagulation factor VIII-associated 1 |
| FAH              | -3.01 | -1.31 | 0.28  | 4.12E-05 | 0.0003 | fumarylacetoacetate hydrolase (fumarylacetoacetase)                                                              |
| FAM101A          | -3.08 | -1.38 | 0.24  | 1.59E-05 | 0.0002 | family with sequence similarity 101, member A                                                                    |
| FAM107A          | 3.39  | 0.33  | -1.43 | 4.88E-06 | 0.0002 | family with sequence similarity 107, member A                                                                    |
| FAM109A          | 3.43  | 0.4   | -1.38 | 1.97E-05 | 0.0002 | family with sequence similarity 109, member A                                                                    |
| FAM118B          | 3.1   | 0.43  | -1.2  | 1.18E-05 | 0.0002 | family with sequence similarity 118, member B                                                                    |
| FAM122A          | -3.37 | -1.43 | 0.32  | 3.59E-05 | 0.0003 | family with sequence similarity 122A                                                                             |
| FAM135B          | -3.09 | -1.28 | 0.35  | 9.98E-06 | 0.0002 | family with sequence similarity 135, member B                                                                    |
| FAM155B          | -3.3  | -1.37 | 0.35  | 1.85E-05 | 0.0002 | family with sequence similarity 155, member B                                                                    |
| FAM156B; FAM156A | -3.21 | -1.35 | 0.34  | 0.0002   | 0.0010 | family with sequence similarity 156, member B; family with sequence similarity 156, member A                     |
| FAM156B; FAM156A | -3.09 | -1.28 | 0.35  | 0.0002   | 0.0010 | family with sequence similarity 156, member B; family with sequence similarity 156, member A                     |
| FAM162B          | -3.25 | -1.38 | 0.32  | 4.45E-06 | 0.0002 | family with sequence similarity 162, member B                                                                    |
| FAM163B          | 3.33  | 0.32  | -1.41 | 1.12E-05 | 0.0002 | family with sequence similarity 163, member B                                                                    |
| FAM171A1         | -3    | -1.31 | 0.27  | 1.49E-05 | 0.0002 | family with sequence similarity 171, member A1                                                                   |
| FAM171B          | 3.23  | 0.37  | -1.32 | 5.61E-06 | 0.0002 | family with sequence similarity 171, member B                                                                    |
| FAM180B          | 3.63  | 0.43  | -1.43 | 6.55E-05 | 0.0004 | family with sequence similarity 180, member B                                                                    |
| FAM195A          | -3.12 | -1.36 | 0.28  | 0.0001   | 0.0006 | family with sequence similarity 195, member A                                                                    |
| FAM19A4          | -3.04 | -1.28 | 0.32  | 2.59E-05 | 0.0003 | family with sequence similarity 19 (chemokine (C-C motif)-like), member A4                                       |
| FAM210B          | -3.12 | -1.36 | 0.28  | 2.65E-05 | 0.0003 | family with sequence similarity 210, member B                                                                    |

|                  |       |       |       |          |        |                                                                                                                         |
|------------------|-------|-------|-------|----------|--------|-------------------------------------------------------------------------------------------------------------------------|
| FAM216B          | -3.12 | -1.36 | 0.28  | 9.52E-06 | 0.0002 | family with sequence similarity 216, member B                                                                           |
| FAM221A          | 3.28  | 0.32  | -1.39 | 4.37E-06 | 0.0002 | family with sequence similarity 221, member A                                                                           |
| FAM230B; FAM230A | -3.05 | -1.37 | 0.23  | 0.0002   | 0.0010 | family with sequence similarity 230, member B (non-protein coding); family with sequence similarity 230, member A       |
| FAM3D            | -3.04 | -1.28 | 0.32  | 5.12E-05 | 0.0004 | family with sequence similarity 3, member D                                                                             |
| FAM45B; FAM45A   | -3.44 | -1.42 | 0.36  | 2.46E-05 | 0.0002 | family with sequence similarity 45, member A pseudogene; family with sequence similarity 45, member A                   |
| FAM46A           | 3.5   | 0.35  | -1.46 | 4.03E-06 | 0.0002 | family with sequence similarity 46, member A                                                                            |
| FAM53A           | -3.06 | -1.33 | 0.28  | 1.11E-05 | 0.0002 | family with sequence similarity 53, member A                                                                            |
| FAM81B           | 3.44  | 0.32  | -1.46 | 1.02E-05 | 0.0002 | family with sequence similarity 81, member B                                                                            |
| FAM83G           | -3.41 | -1.38 | 0.39  | 0.0002   | 0.0009 | family with sequence similarity 83, member G                                                                            |
| FAM86B1          | -3.24 | -1.41 | 0.29  | 5.60E-06 | 0.0002 | family with sequence similarity 86, member B1                                                                           |
| FAM86EP          | -3.22 | -1.36 | 0.32  | 0.0001   | 0.0006 | family with sequence similarity 86, member A pseudogene                                                                 |
| FAM8A1           | -3.01 | -1.31 | 0.28  | 1.97E-05 | 0.0002 | family with sequence similarity 8, member A1                                                                            |
| FAM98A           | -3.41 | -1.38 | 0.39  | 2.01E-05 | 0.0002 | family with sequence similarity 98, member A                                                                            |
| FAM99A           | 3.41  | 0.32  | -1.44 | 6.93E-06 | 0.0002 | family with sequence similarity 99, member A (non-protein coding)                                                       |
| FAR2P1           | -3.43 | -1.46 | 0.32  | 7.11E-05 | 0.0004 | fatty acyl-CoA reductase 2 pseudogene 1                                                                                 |
| FASTKD1          | -3.28 | -1.36 | 0.35  | 5.04E-05 | 0.0003 | FAST kinase domains 1                                                                                                   |
| FAU; SYVN1       | -3.18 | -1.28 | 0.39  | 0.0001   | 0.0007 | Finkel-Biskis-Reilly murine sarcoma virus (FBR-MuSV) ubiquitously expressed; synovial apoptosis inhibitor 1, synoviolin |
| FBXL14           | -3.03 | -1.3  | 0.3   | 0.0001   | 0.0007 | F-box and leucine-rich repeat protein 14                                                                                |
| FBXL16           | -3.09 | -1.35 | 0.28  | 2.58E-05 | 0.0003 | F-box and leucine-rich repeat protein 16                                                                                |
| FBXL19; SETD1A   | -3.09 | -1.35 | 0.28  | 2.57E-05 | 0.0003 | F-box and leucine-rich repeat protein 19; SET domain containing 1A                                                      |
| FBXO16           | -3.18 | -1.31 | 0.36  | 1.03E-05 | 0.0002 | F-box protein 16                                                                                                        |
| FBXO6            | 3.26  | 0.32  | -1.38 | 4.74E-05 | 0.0003 | F-box protein 6                                                                                                         |
| FBXW10           | -3.16 | -1.38 | 0.28  | 0.0005   | 0.0019 | F-box and WD repeat domain containing 10                                                                                |
| FBXW2            | 3.4   | 0.37  | -1.39 | 6.46E-06 | 0.0002 | F-box and WD repeat domain containing 2                                                                                 |
| FCER1A           | -3.14 | -1.35 | 0.3   | 2.26E-05 | 0.0002 | Fc fragment of IgE, high affinity I, receptor for; alpha polypeptide                                                    |
| FCN2             | -3.29 | -1.31 | 0.41  | 2.11E-05 | 0.0002 | ficolin (collagen/fibrinogen domain containing lectin) 2                                                                |
| FCRL1            | -3.05 | -1.36 | 0.24  | 2.36E-05 | 0.0002 | Fc receptor-like 1                                                                                                      |
| FCRL6            | 3.47  | 0.32  | -1.47 | 3.65E-06 | 0.0002 | Fc receptor-like 6                                                                                                      |
| FER1L5           | -3.24 | -1.33 | 0.36  | 8.67E-06 | 0.0002 | fer-1-like family member 5                                                                                              |
| FGF11            | 3.24  | 0.41  | -1.29 | 5.65E-05 | 0.0004 | fibroblast growth factor 11                                                                                             |
| FGF14            | -3.04 | -1.28 | 0.32  | 0.0002   | 0.0010 | fibroblast growth factor 14                                                                                             |
| FGF22            | 3.26  | 0.32  | -1.38 | 5.09E-06 | 0.0002 | fibroblast growth factor 22                                                                                             |
| FGF23            | 3.52  | 0.43  | -1.38 | 3.94E-06 | 0.0002 | fibroblast growth factor 23                                                                                             |
| FHL1             | -3.18 | -1.38 | 0.29  | 5.54E-05 | 0.0004 | four and a half LIM domains 1                                                                                           |
| FHL2             | 3.25  | 0.31  | -1.39 | 7.51E-06 | 0.0002 | four and a half LIM domains 2                                                                                           |
| FIGNL2           | -3.01 | -1.31 | 0.28  | 2.69E-05 | 0.0003 | fidgetin-like 2                                                                                                         |
| FILIP1           | 3.26  | 0.41  | -1.29 | 9.92E-06 | 0.0002 | filamin A interacting protein 1                                                                                         |
| FKBP14           | -3.1  | -1.36 | 0.27  | 4.70E-06 | 0.0002 | FK506 binding protein 14                                                                                                |

|                    |       |       |       |          |        |                                                                                                                                                |
|--------------------|-------|-------|-------|----------|--------|------------------------------------------------------------------------------------------------------------------------------------------------|
| FKBP4              | 3.02  | 0.39  | -1.2  | 1.95E-05 | 0.0002 | FK506 binding protein 4                                                                                                                        |
| FKBPL              | -3.01 | -1.31 | 0.28  | 5.87E-06 | 0.0002 | FK506 binding protein like                                                                                                                     |
| FKBPL              | -3.01 | -1.31 | 0.28  | 5.87E-06 | 0.0002 | FK506 binding protein like                                                                                                                     |
| FLCN; PLD6         | -3.22 | -1.36 | 0.32  | 2.79E-06 | 0.0002 | folliculin; phospholipase D family, member 6                                                                                                   |
| FLJ31715           | 3.53  | 0.44  | -1.38 | 7.72E-06 | 0.0002 | uncharacterized FLJ31715                                                                                                                       |
| FLJ32154           | -3.12 | -1.36 | 0.28  | 5.02E-05 | 0.0003 | uncharacterized protein FLJ32154                                                                                                               |
| FLJ35816           | -3    | -1.31 | 0.28  | 1.90E-05 | 0.0002 | FLJ35816 protein                                                                                                                               |
| FLJ40536           | -3.14 | -1.28 | 0.37  | 0.0004   | 0.0016 | FLJ40536 protein                                                                                                                               |
| FLJ42220           | -3.37 | -1.36 | 0.39  | 3.46E-05 | 0.0003 | FLJ42220 protein                                                                                                                               |
| FLJ44477           | 3.15  | 0.21  | -1.44 | 3.61E-06 | 0.0002 | FLJ44477 protein                                                                                                                               |
| FLT4               | -3.16 | -1.36 | 0.3   | 3.92E-06 | 0.0002 | fms-related tyrosine kinase 4                                                                                                                  |
| FMO9P              | 3.13  | 0.26  | -1.39 | 4.32E-06 | 0.0002 | flavin containing monooxygenase 9 pseudogene                                                                                                   |
| FNDC8              | 3.24  | 0.31  | -1.38 | 4.11E-05 | 0.0003 | fibronectin type III domain containing 8                                                                                                       |
| FOXD3              | 3.37  | 0.32  | -1.43 | 7.50E-06 | 0.0002 | forkhead box D3                                                                                                                                |
| FOXJ1              | 3.02  | 0.39  | -1.2  | 1.28E-05 | 0.0002 | forkhead box J1                                                                                                                                |
| FOXQ1              | -3.14 | -1.31 | 0.34  | 1.99E-05 | 0.0002 | forkhead box Q1                                                                                                                                |
| FPR3               | -3.09 | -1.35 | 0.28  | 0.0001   | 0.0006 | formyl peptide receptor 3                                                                                                                      |
| 31JP; FRG1DP; FRG: | 3.6   | 0.41  | -1.44 | 8.04E-06 | 0.0002 | FSHD region gene 1 family member J, pseudogene; FSHD region gene 1 family member D, pseudogene; FSHD region gene 1 family member C, pseudogene |
| FRMD6              | 3.4   | 0.38  | -1.38 | 2.13E-05 | 0.0002 | FERM domain containing 6                                                                                                                       |
| FSCN2              | 3.78  | 0.47  | -1.44 | 5.35E-06 | 0.0002 | fascin actin-bundling protein 2, retinal                                                                                                       |
| FSHB               | -3.01 | -1.31 | 0.28  | 0.0002   | 0.0008 | follicle stimulating hormone, beta polypeptide                                                                                                 |
| FST                | 3.19  | 0.47  | -1.2  | 0.0001   | 0.0006 | follistatin                                                                                                                                    |
| FTCD               | -3.31 | -1.36 | 0.36  | 4.88E-05 | 0.0003 | formimidoyltransferase cyclodeaminase                                                                                                          |
| FUT11              | 3.46  | 0.39  | -1.4  | 8.20E-06 | 0.0002 | fucosyltransferase 11 (alpha (1,3) fucosyltransferase)                                                                                         |
| FXYD1              | 3.37  | 0.32  | -1.43 | 3.20E-06 | 0.0002 | FXYD domain containing ion transport regulator 1                                                                                               |
| FXYD4              | 3.41  | 0.32  | -1.44 | 8.09E-06 | 0.0002 | FXYD domain containing ion transport regulator 4                                                                                               |
| FZD10              | -3.09 | -1.28 | 0.35  | 5.36E-06 | 0.0002 | frizzled class receptor 10                                                                                                                     |
| FZD3               | -3.04 | -1.31 | 0.29  | 3.86E-05 | 0.0003 | frizzled class receptor 3                                                                                                                      |
| FZD8               | 3.21  | 0.24  | -1.44 | 3.00E-06 | 0.0002 | frizzled class receptor 8                                                                                                                      |
| GABARAPL1          | 3.26  | 0.32  | -1.38 | 5.02E-05 | 0.0003 | GABA(A) receptor-associated protein like 1                                                                                                     |
| GABARAPL3          | 3.26  | 0.32  | -1.38 | 7.27E-06 | 0.0002 | GABA(A) receptors associated protein like 3, pseudogene                                                                                        |
| GAD1               | 3.33  | 0.36  | -1.38 | 2.50E-06 | 0.0002 | glutamate decarboxylase 1                                                                                                                      |
| GAD2               | 3.55  | 0.38  | -1.44 | 2.64E-06 | 0.0002 | glutamate decarboxylase 2                                                                                                                      |
| GADD45G            | 3.11  | 0.35  | -1.29 | 2.66E-05 | 0.0003 | growth arrest and DNA-damage-inducible, gamma                                                                                                  |
| GAL3ST4            | -3.15 | -1.31 | 0.35  | 1.58E-05 | 0.0002 | galactose-3-O-sulfotransferase 4                                                                                                               |
| GALE               | -3.03 | -1.3  | 0.3   | 0.0001   | 0.0006 | UDP-galactose-4-epimerase                                                                                                                      |
| GAN                | -3    | -1.28 | 0.31  | 6.80E-05 | 0.0004 | gigaxonin                                                                                                                                      |
| GARNL3             | -3    | -1.28 | 0.31  | 1.04E-05 | 0.0002 | GTPase activating Rap/RanGAP domain-like 3                                                                                                     |

|                   |       |       |       |          |        |                                                                                                                                                                                |
|-------------------|-------|-------|-------|----------|--------|--------------------------------------------------------------------------------------------------------------------------------------------------------------------------------|
| GAS2L1            | -3.24 | -1.34 | 0.36  | 1.45E-05 | 0.0002 | growth arrest-specific 2 like 1                                                                                                                                                |
| GAS6-AS1          | 3.31  | 0.32  | -1.4  | 2.99E-05 | 0.0003 | GAS6 antisense RNA 1                                                                                                                                                           |
| GAS8              | 3.02  | 0.39  | -1.2  | 2.59E-05 | 0.0003 | growth arrest-specific 8                                                                                                                                                       |
| GAST              | 3.2   | 0.3   | -1.38 | 3.89E-05 | 0.0003 | gastrin                                                                                                                                                                        |
| GATA1             | -3.13 | -1.28 | 0.36  | 3.06E-06 | 0.0002 | GATA binding protein 1 (globin transcription factor 1)                                                                                                                         |
| GATA5             | 3.02  | 0.39  | -1.2  | 3.37E-05 | 0.0003 | GATA binding protein 5                                                                                                                                                         |
| GBGT1             | -3.11 | -1.36 | 0.27  | 9.60E-06 | 0.0002 | globoside alpha-1,3-N-acetylgalactosaminyltransferase 1                                                                                                                        |
| GCOM2             | -3.06 | -1.33 | 0.28  | 0.0002   | 0.0008 | GRINL1B complex locus 2, pseudogene                                                                                                                                            |
| GDF5              | -3.08 | -1.31 | 0.31  | 3.43E-05 | 0.0003 | growth differentiation factor 5                                                                                                                                                |
| GEMIN2            | -3.17 | -1.43 | 0.23  | 4.26E-05 | 0.0003 | gem nuclear organelle associated protein 2                                                                                                                                     |
| GEMIN4            | 3.19  | 0.47  | -1.2  | 3.41E-05 | 0.0003 | gem nuclear organelle associated protein 4                                                                                                                                     |
| GFER              | 3.26  | 0.32  | -1.38 | 4.97E-06 | 0.0002 | growth factor, augmentor of liver regeneration                                                                                                                                 |
| GFI1B             | -3.03 | -1.36 | 0.24  | 0.0002   | 0.0008 | growth factor independent 1B transcription repressor                                                                                                                           |
| GFRA1             | -3.02 | -1.34 | 0.26  | 0.0001   | 0.0006 | GNDF family receptor alpha 1                                                                                                                                                   |
| GFRA4             | 3.4   | 0.38  | -1.38 | 8.10E-06 | 0.0002 | GNDF family receptor alpha 4                                                                                                                                                   |
| GGNBP1            | 3.41  | 0.32  | -1.44 | 9.86E-06 | 0.0002 | gametogenetin binding protein 1 (pseudogene)                                                                                                                                   |
| GGT6              | -3.13 | -1.28 | 0.36  | 1.07E-05 | 0.0002 | gamma-glutamyltransferase 6                                                                                                                                                    |
| GIMAP7            | -3.09 | -1.38 | 0.24  | 4.41E-05 | 0.0003 | GTPase, IMAP family member 7                                                                                                                                                   |
| GIP               | 3.11  | 0.32  | -1.31 | 1.58E-05 | 0.0002 | gastric inhibitory polypeptide                                                                                                                                                 |
| GIT2              | -3.21 | -1.43 | 0.25  | 5.18E-05 | 0.0004 | G protein-coupled receptor kinase interacting ArfGAP 2                                                                                                                         |
| GJA5              | -3.22 | -1.36 | 0.32  | 1.09E-05 | 0.0002 | gap junction protein alpha 5                                                                                                                                                   |
| GLIPR1            | -3.09 | -1.32 | 0.31  | 3.62E-05 | 0.0003 | GLI pathogenesis-related 1                                                                                                                                                     |
| GLIS3             | 3.54  | 0.43  | -1.39 | 6.02E-06 | 0.0002 | GLIS family zinc finger 3                                                                                                                                                      |
| GLTP              | 3.4   | 0.29  | -1.47 | 5.51E-05 | 0.0004 | glycolipid transfer protein                                                                                                                                                    |
| GLUD2             | -3.43 | -1.41 | 0.37  | 2.40E-05 | 0.0002 | glutamate dehydrogenase 2                                                                                                                                                      |
| GM140             | 3.3   | 0.32  | -1.4  | 6.25E-05 | 0.0004 | uncharacterized LOC100287948                                                                                                                                                   |
| GNAQ              | 3.93  | 0.4   | -1.57 | 0.0005   | 0.0019 | guanine nucleotide binding protein (G protein), q polypeptide                                                                                                                  |
| GNB4              | -3.02 | -1.36 | 0.23  | 1.20E-05 | 0.0002 | guanine nucleotide binding protein (G protein), beta polypeptide 4                                                                                                             |
| GNE               | -3.01 | -1.31 | 0.28  | 4.80E-05 | 0.0003 | glucosamine (UDP-N-acetyl)-2-epimerase/N-acetylmannosamine kinase                                                                                                              |
| GNG13             | 3.08  | 0.42  | -1.2  | 5.26E-06 | 0.0002 | guanine nucleotide binding protein (G protein), gamma 13                                                                                                                       |
| GNG4              | -3.04 | -1.28 | 0.33  | 3.34E-06 | 0.0002 | guanine nucleotide binding protein (G protein), gamma 4                                                                                                                        |
| GNG8              | -3.06 | -1.31 | 0.3   | 6.54E-05 | 0.0004 | guanine nucleotide binding protein (G protein), gamma 8                                                                                                                        |
| GNRHR2            | -3.04 | -1.39 | 0.22  | 4.93E-05 | 0.0003 | gonadotropin releasing hormone receptor 2, pseudogene                                                                                                                          |
| GOLGA2            | 3.21  | 0.3   | -1.38 | 3.39E-06 | 0.0002 | golgin A2                                                                                                                                                                      |
| GOLGA6L2          | -3.16 | -1.41 | 0.25  | 9.15E-06 | 0.0002 | golgin A6 family-like 2                                                                                                                                                        |
| GOLGA7            | -3.22 | -1.31 | 0.38  | 9.32E-05 | 0.0005 | golgin A7                                                                                                                                                                      |
| OLGA8CP; GOLGA8   | -3.01 | -1.31 | 0.28  | 7.54E-06 | 0.0002 | golgin A8 family, member C, pseudogene; golgin A8 family, member D, pseudogene                                                                                                 |
| .8EP; GOLGA8F; GC | -3.09 | -1.31 | 0.32  | 5.70E-06 | 0.0002 | golgin A8 family, member C, pseudogene; golgin A8 family, member E, pseudogene; golgin A8 family, member F; golgin A8 family, member G; golgin A8 family, member D, pseudogene |

|                   |       |       |       |          |        |                                                                                                                                                                                |
|-------------------|-------|-------|-------|----------|--------|--------------------------------------------------------------------------------------------------------------------------------------------------------------------------------|
| .8EP; GOLGA8F; GC | -3.09 | -1.31 | 0.32  | 5.70E-06 | 0.0002 | golgin A8 family, member C, pseudogene; golgin A8 family, member E, pseudogene; golgin A8 family, member F; golgin A8 family, member G; golgin A8 family, member D, pseudogene |
| .8EP; GOLGA8F; GC | -3.06 | -1.32 | 0.29  | 7.15E-06 | 0.0002 | golgin A8 family, member C, pseudogene; golgin A8 family, member E, pseudogene; golgin A8 family, member F; golgin A8 family, member G; golgin A8 family, member D, pseudogene |
| DP; GOLGA8CP; GC  | -3.06 | -1.31 | 0.3   | 7.45E-06 | 0.0002 | golgin A8 family, member D, pseudogene; golgin A8 family, member C, pseudogene; golgin A8 family, member E, pseudogene                                                         |
| GOLPH3            | -3.17 | -1.33 | 0.33  | 9.02E-06 | 0.0002 | golgi phosphoprotein 3 (coat-protein)                                                                                                                                          |
| GP5               | 3.1   | 0.21  | -1.42 | 9.98E-06 | 0.0002 | glycoprotein V (platelet)                                                                                                                                                      |
| GPATCH4           | -3.01 | -1.31 | 0.28  | 6.48E-05 | 0.0004 | G-patch domain containing 4                                                                                                                                                    |
| GPIHBP1           | 3.32  | 0.3   | -1.43 | 8.52E-06 | 0.0002 | glycosylphosphatidylinositol anchored high density lipoprotein binding protein 1                                                                                               |
| GPR135; L3HYPDH   | -3.04 | -1.3  | 0.31  | 1.07E-05 | 0.0002 | G protein-coupled receptor 135; L-3-hydroxyproline dehydratase (trans-)                                                                                                        |
| GPR156            | 3.02  | 0.3   | -1.29 | 7.80E-06 | 0.0002 | G protein-coupled receptor 156                                                                                                                                                 |
| GPR35             | -3.14 | -1.3  | 0.36  | 7.04E-05 | 0.0004 | G protein-coupled receptor 35                                                                                                                                                  |
| GPR52             | -3.12 | -1.36 | 0.28  | 5.71E-06 | 0.0002 | G protein-coupled receptor 52                                                                                                                                                  |
| GPR85             | 3.12  | 0.2   | -1.44 | 2.22E-05 | 0.0002 | G protein-coupled receptor 85                                                                                                                                                  |
| GPSM3             | -3.23 | -1.41 | 0.28  | 8.54E-06 | 0.0002 | G-protein signaling modulator 3                                                                                                                                                |
| GRAPL; GRAP       | 3.67  | 0.43  | -1.44 | 9.51E-06 | 0.0002 | GRB2-related adaptor protein-like; GRB2-related adaptor protein                                                                                                                |
| GRB2              | -3.03 | -1.3  | 0.3   | 0.0001   | 0.0006 | growth factor receptor bound protein 2                                                                                                                                         |
| GRIN1             | 3.46  | 0.39  | -1.4  | 1.99E-05 | 0.0002 | glutamate receptor, ionotropic, N-methyl D-aspartate 1                                                                                                                         |
| GRK1              | -3.02 | -1.35 | 0.25  | 6.33E-05 | 0.0004 | G protein-coupled receptor kinase 1                                                                                                                                            |
| GRK5              | 3.45  | 0.41  | -1.38 | 9.50E-06 | 0.0002 | G protein-coupled receptor kinase 5                                                                                                                                            |
| GRM4              | -3.23 | -1.32 | 0.37  | 2.36E-05 | 0.0002 | glutamate receptor, metabotropic 4                                                                                                                                             |
| GSDMB             | 3.2   | 0.25  | -1.43 | 9.73E-06 | 0.0002 | gasdermin B                                                                                                                                                                    |
| GSS               | 3.24  | 0.31  | -1.38 | 2.73E-06 | 0.0002 | glutathione synthetase                                                                                                                                                         |
| GSTA2             | -3.23 | -1.41 | 0.28  | 8.54E-05 | 0.0005 | glutathione S-transferase alpha 2                                                                                                                                              |
| GSTM4; GSTM2      | 3.25  | 0.5   | -1.2  | 3.21E-05 | 0.0003 | glutathione S-transferase mu 4; glutathione S-transferase mu 2 (muscle)                                                                                                        |
| GSTP1             | 3.44  | 0.32  | -1.46 | 5.76E-05 | 0.0004 | glutathione S-transferase pi 1                                                                                                                                                 |
| GSX1              | 3.53  | 0.39  | -1.43 | 2.00E-05 | 0.0002 | GS homeobox 1                                                                                                                                                                  |
| GTF2A1            | -3.12 | -1.34 | 0.3   | 2.04E-05 | 0.0002 | general transcription factor IIA 1                                                                                                                                             |
| GTF3C5            | 3.01  | 0.39  | -1.2  | 2.90E-05 | 0.0003 | general transcription factor IIIC subunit 5                                                                                                                                    |
| GUCY1A3           | -3.05 | -1.38 | 0.23  | 4.26E-06 | 0.0002 | guanylate cyclase 1, soluble, alpha 3                                                                                                                                          |
| GZMA              | -3.17 | -1.28 | 0.38  | 1.50E-05 | 0.0002 | granzyme A                                                                                                                                                                     |
| GZMM              | -3.05 | -1.28 | 0.33  | 5.63E-06 | 0.0002 | granzyme M                                                                                                                                                                     |
| H1FX              | 3.28  | 0.33  | -1.38 | 5.42E-06 | 0.0002 | H1 histone family, member X                                                                                                                                                    |
| HABP4             | -3.03 | -1.32 | 0.28  | 3.69E-05 | 0.0003 | hyaluronan binding protein 4                                                                                                                                                   |
| HACD2             | 3.3   | 0.32  | -1.4  | 6.54E-06 | 0.0002 | 3-hydroxyacyl-CoA dehydratase 2                                                                                                                                                |
| HAGH              | 3.7   | 0.51  | -1.38 | 1.44E-05 | 0.0002 | hydroxyacylglutathione hydrolase                                                                                                                                               |
| HARBI1            | -3.01 | -1.31 | 0.28  | 5.16E-05 | 0.0004 | harbinger transposase derived 1                                                                                                                                                |
| HAUS1             | -3.14 | -1.28 | 0.37  | 1.39E-05 | 0.0002 | HAUS augmin like complex subunit 1                                                                                                                                             |
| HAUS2             | -3.05 | -1.33 | 0.28  | 5.47E-06 | 0.0002 | HAUS augmin like complex subunit 2                                                                                                                                             |
| HAX1              | 3.14  | 0.36  | -1.29 | 1.17E-05 | 0.0002 | HCLS1 associated protein X-1                                                                                                                                                   |



|                  |       |       |       |          |        |                                                                                 |
|------------------|-------|-------|-------|----------|--------|---------------------------------------------------------------------------------|
| HBB              | -3.47 | -1.43 | 0.36  | 9.34E-05 | 0.0005 | hemoglobin, beta                                                                |
| HBE1             | 3.4   | 0.32  | -1.44 | 9.92E-06 | 0.0002 | hemoglobin, epsilon 1                                                           |
| HBZ              | -3.08 | -1.35 | 0.28  | 0.0001   | 0.0006 | hemoglobin, zeta                                                                |
| HCRP1            | -3.1  | -1.36 | 0.27  | 1.46E-05 | 0.0002 | hepatocellular carcinoma-related HCRP1                                          |
| HDAC8            | 3.29  | 0.27  | -1.44 | 7.72E-06 | 0.0002 | histone deacetylase 8                                                           |
| HDHD2            | -3.1  | -1.36 | 0.27  | 9.29E-06 | 0.0002 | haloacid dehalogenase-like hydrolase domain containing 2                        |
| HEATR6           | 3.05  | 0.16  | -1.44 | 2.46E-05 | 0.0002 | HEAT repeat containing 6                                                        |
| HEBP2            | 3.32  | 0.32  | -1.41 | 3.13E-05 | 0.0003 | heme binding protein 2                                                          |
| HECTD4           | 3.06  | 0.32  | -1.29 | 3.54E-05 | 0.0003 | HECT domain containing E3 ubiquitin protein ligase 4                            |
| HELB             | 3.28  | 0.32  | -1.39 | 2.38E-05 | 0.0002 | helicase (DNA) B                                                                |
| HELQ             | -3.12 | -1.36 | 0.28  | 1.03E-05 | 0.0002 | helicase, POLQ-like                                                             |
| HERC5            | -3.12 | -1.36 | 0.28  | 0.0001   | 0.0006 | HECT and RLD domain containing E3 ubiquitin protein ligase 5                    |
| HERPUD2          | 3.01  | 0.39  | -1.2  | 1.19E-05 | 0.0002 | HERPUD family member 2                                                          |
| HEXDC            | 3.23  | 0.26  | -1.43 | 6.62E-06 | 0.0002 | hexosaminidase (glycosyl hydrolase family 20, catalytic domain) containing      |
| HEXIM1           | -3.06 | -1.33 | 0.28  | 5.98E-05 | 0.0004 | hexamethylene bis-acetamide inducible 1                                         |
| HEXIM2           | 3.04  | 0.23  | -1.38 | 1.32E-05 | 0.0002 | hexamethylene bis-acetamide inducible 2                                         |
| HGS              | 3.07  | 0.24  | -1.38 | 5.33E-06 | 0.0002 | hepatocyte growth factor-regulated tyrosine kinase substrate                    |
| HHATL; CCDC13    | -3.12 | -1.33 | 0.31  | 2.63E-05 | 0.0003 | hedgehog acyltransferase-like; coiled-coil domain containing 13                 |
| HIGD1B           | 3.34  | 0.36  | -1.38 | 8.53E-06 | 0.0002 | HIG1 hypoxia inducible domain family, member 1B                                 |
| HINFP            | 3.39  | 0.32  | -1.44 | 0.0002   | 0.0009 | histone H4 transcription factor                                                 |
| HIP1             | 3.08  | 0.42  | -1.2  | 0.0001   | 0.0005 | huntingtin interacting protein 1                                                |
| HIST1H2AC        | 3.52  | 0.43  | -1.38 | 1.16E-05 | 0.0002 | histone cluster 1, H2ac                                                         |
| HIST1H2AH        | 3.4   | 0.38  | -1.38 | 2.03E-05 | 0.0002 | histone cluster 1, H2ah                                                         |
| HIST1H2AK        | 3.61  | 0.47  | -1.38 | 1.46E-05 | 0.0002 | histone cluster 1, H2ak                                                         |
| ST1H2AL; HIST1H2 | 3     | 0.38  | -1.2  | 1.22E-05 | 0.0002 | histone cluster 1, H2al; histone cluster 1, H2bn                                |
| HIST1H3B         | 3.57  | 0.39  | -1.44 | 1.41E-05 | 0.0002 | histone cluster 1, H3b                                                          |
| HIST1H3C         | -3.09 | -1.28 | 0.35  | 2.74E-05 | 0.0003 | histone cluster 1, H3c                                                          |
| ST1H3D; HIST1H2F | 3.33  | 0.32  | -1.41 | 3.73E-06 | 0.0002 | histone cluster 1, H3d; histone cluster 1, H2ad                                 |
| HIST1H4A         | -3.31 | -1.36 | 0.36  | 2.91E-05 | 0.0003 | histone cluster 1, H4a                                                          |
| HIST1H4D         | 3.3   | 0.32  | -1.4  | 0.0001   | 0.0006 | histone cluster 1, H4d                                                          |
| HIST2H2BA; H2BFS | -3.08 | -1.3  | 0.33  | 5.48E-05 | 0.0004 | histone cluster 2, H2ba (pseudogene); H2B histone family, member S (pseudogene) |
| HIST2H2BF        | 3.3   | 0.32  | -1.4  | 0.0001   | 0.0006 | histone cluster 2, H2bf                                                         |
| HK1              | 3.36  | 0.36  | -1.39 | 1.21E-05 | 0.0002 | hexokinase 1                                                                    |
| HLA-DMB          | -3.06 | -1.33 | 0.28  | 3.76E-05 | 0.0003 | major histocompatibility complex, class II, DM beta                             |
| HLA-DMB          | -3.11 | -1.36 | 0.28  | 4.54E-05 | 0.0003 | major histocompatibility complex, class II, DM beta                             |
| HMGB3P1          | 3.21  | 0.24  | -1.44 | 1.62E-05 | 0.0002 | high mobility group box 3 pseudogene 1                                          |
| HMGN2            | 3.06  | 0.41  | -1.2  | 3.28E-06 | 0.0002 | high mobility group nucleosomal binding domain 2                                |
| HMGN2P46         | 3.33  | 0.32  | -1.41 | 2.95E-05 | 0.0003 | high mobility group nucleosomal binding domain 2 pseudogene 46                  |

|                |       |       |       |          |        |                                                                                                        |
|----------------|-------|-------|-------|----------|--------|--------------------------------------------------------------------------------------------------------|
| HMX1           | -3.18 | -1.41 | 0.26  | 9.97E-06 | 0.0002 | H6 family homeobox 1                                                                                   |
| HNRNPUL1       | 3.15  | 0.24  | -1.41 | 2.55E-05 | 0.0003 | heterogeneous nuclear ribonucleoprotein U-like 1                                                       |
| HOXA13         | 3.41  | 0.32  | -1.44 | 0.0001   | 0.0006 | homeobox A13                                                                                           |
| HOXB8          | -3.16 | -1.31 | 0.35  | 2.33E-05 | 0.0002 | homeobox B8                                                                                            |
| HOXC12         | 3.13  | 0.45  | -1.2  | 1.13E-05 | 0.0002 | homeobox C12                                                                                           |
| HOXD13         | 3.5   | 0.42  | -1.39 | 2.43E-05 | 0.0002 | homeobox D13                                                                                           |
| HOXD4          | -3.11 | -1.31 | 0.32  | 2.22E-05 | 0.0002 | homeobox D4                                                                                            |
| HP1BP3         | 3.37  | 0.32  | -1.43 | 1.80E-05 | 0.0002 | heterochromatin protein 1, binding protein 3                                                           |
| HPCAL1         | -3.16 | -1.31 | 0.35  | 3.56E-06 | 0.0002 | hippocalcin-like 1                                                                                     |
| HPDL           | -3.15 | -1.33 | 0.32  | 2.12E-05 | 0.0002 | 4-hydroxyphenylpyruvate dioxygenase-like                                                               |
| HPS4           | -3.16 | -1.38 | 0.28  | 4.39E-05 | 0.0003 | Hermansky-Pudlak syndrome 4                                                                            |
| HPS5           | 3.2   | 0.28  | -1.4  | 8.97E-06 | 0.0002 | Hermansky-Pudlak syndrome 5                                                                            |
| HPSE           | -3.05 | -1.34 | 0.27  | 1.54E-05 | 0.0002 | heparanase                                                                                             |
| HRH4           | 3.3   | 0.32  | -1.4  | 2.00E-05 | 0.0002 | histamine receptor H4                                                                                  |
| HRNR; RPTN     | -3.43 | -1.41 | 0.36  | 8.38E-06 | 0.0002 | hornerin; repetin                                                                                      |
| HS3ST3A1       | 3.41  | 0.32  | -1.44 | 1.06E-05 | 0.0002 | heparan sulfate (glucosamine) 3-O-sulfotransferase 3A1                                                 |
| HS3ST5         | 3.43  | 0.31  | -1.47 | 3.59E-05 | 0.0003 | heparan sulfate (glucosamine) 3-O-sulfotransferase 5                                                   |
| HSBP1          | 3.33  | 0.32  | -1.41 | 4.48E-05 | 0.0003 | heat shock factor binding protein 1                                                                    |
| HSF2BP         | 3.28  | 0.32  | -1.39 | 1.56E-05 | 0.0002 | heat shock transcription factor 2 binding protein                                                      |
| HSF4; FBXL8    | -3.13 | -1.28 | 0.36  | 3.13E-05 | 0.0003 | heat shock transcription factor 4; F-box and leucine-rich repeat protein 8                             |
| HSFX2; HSFX1   | 3.09  | 0.34  | -1.29 | 1.59E-05 | 0.0002 | heat shock transcription factor family, X-linked 2; heat shock transcription factor family, X-linked 1 |
| HSFX2; HSFX1   | 3.09  | 0.34  | -1.29 | 1.59E-05 | 0.0002 | heat shock transcription factor family, X-linked 2; heat shock transcription factor family, X-linked 1 |
| HSP90AA5P      | 3.39  | 0.32  | -1.44 | 6.04E-05 | 0.0004 | heat shock protein 90kDa alpha (cytosolic), class A member 5, pseudogene                               |
| HSP90AB4P      | -3.05 | -1.31 | 0.3   | 1.30E-05 | 0.0002 | heat shock protein 90kDa alpha (cytosolic), class B member 4, pseudogene                               |
| HSPA1A; HSPA1B | -3.25 | -1.31 | 0.39  | 8.62E-05 | 0.0005 | heat shock 70kDa protein 1A; heat shock 70kDa protein 1B                                               |
| HSPA1A; HSPA1B | -3.22 | -1.31 | 0.38  | 9.83E-05 | 0.0005 | heat shock 70kDa protein 1A; heat shock 70kDa protein 1B                                               |
| HSPA2          | 3.19  | 0.29  | -1.39 | 1.41E-05 | 0.0002 | heat shock 70kDa protein 2                                                                             |
| HSPB1          | -3.08 | -1.39 | 0.23  | 1.45E-05 | 0.0002 | heat shock 27kDa protein 1                                                                             |
| HSPB3          | -3.12 | -1.36 | 0.28  | 4.91E-05 | 0.0003 | heat shock 27kDa protein 3                                                                             |
| HSPB6          | -3.16 | -1.38 | 0.28  | 2.76E-05 | 0.0003 | heat shock protein, alpha-crystallin-related, B6                                                       |
| HSPB7          | -3.13 | -1.38 | 0.26  | 0.0002   | 0.0011 | heat shock 27kDa protein family, member 7 (cardiovascular)                                             |
| HTATIP2        | -3.36 | -1.38 | 0.36  | 0.0004   | 0.0016 | HIV-1 Tat interactive protein 2                                                                        |
| HTATSF1P2      | 3.52  | 0.43  | -1.38 | 1.16E-05 | 0.0002 | HIV-1 Tat specific factor 1 pseudogene 2                                                               |
| HTR1B          | 3.07  | 0.21  | -1.4  | 6.00E-05 | 0.0004 | 5-hydroxytryptamine (serotonin) receptor 1B, G protein-coupled                                         |
| HTR1D          | 3.35  | 0.3   | -1.44 | 0.0001   | 0.0005 | 5-hydroxytryptamine (serotonin) receptor 1D, G protein-coupled                                         |
| HTR1E          | -3.24 | -1.38 | 0.32  | 3.55E-05 | 0.0003 | 5-hydroxytryptamine (serotonin) receptor 1E, G protein-coupled                                         |
| HTR6           | -3.06 | -1.33 | 0.28  | 0.0002   | 0.0008 | 5-hydroxytryptamine (serotonin) receptor 6, G protein-coupled                                          |
| HTRA4          | -3.1  | -1.3  | 0.34  | 1.43E-05 | 0.0002 | HtrA serine peptidase 4                                                                                |

|                     |       |       |       |          |        |                                                                                                                                                                                                                                                                              |
|---------------------|-------|-------|-------|----------|--------|------------------------------------------------------------------------------------------------------------------------------------------------------------------------------------------------------------------------------------------------------------------------------|
| HYAL2; TUSC2        | -3.13 | -1.38 | 0.26  | 2.17E-05 | 0.0002 | hyaluronoglucosaminidase 2; tumor suppressor candidate 2                                                                                                                                                                                                                     |
| HYPM                | -3.29 | -1.31 | 0.4   | 5.67E-05 | 0.0004 | huntingtin interacting protein M                                                                                                                                                                                                                                             |
| IBSP                | 3.18  | 0.38  | -1.29 | 4.54E-05 | 0.0003 | integrin-binding sialoprotein                                                                                                                                                                                                                                                |
| ICAM3               | 3.08  | 0.33  | -1.29 | 3.59E-06 | 0.0002 | intercellular adhesion molecule 3                                                                                                                                                                                                                                            |
| ICE2                | -3.24 | -1.33 | 0.36  | 1.00E-05 | 0.0002 | interactor of little elongation complex ELL subunit 2                                                                                                                                                                                                                        |
| IDS                 | -3.13 | -1.32 | 0.32  | 5.00E-05 | 0.0003 | iduronate 2-sulfatase                                                                                                                                                                                                                                                        |
| IER3                | 3.07  | 0.33  | -1.29 | 7.35E-05 | 0.0004 | immediate early response 3                                                                                                                                                                                                                                                   |
| IFI27L1             | -3.13 | -1.28 | 0.36  | 3.49E-05 | 0.0003 | interferon, alpha-inducible protein 27-like 1                                                                                                                                                                                                                                |
| IFI35               | -3.01 | -1.3  | 0.29  | 1.45E-05 | 0.0002 | interferon-induced protein 35                                                                                                                                                                                                                                                |
| IFIT3               | -3.03 | -1.33 | 0.27  | 5.65E-06 | 0.0002 | interferon-induced protein with tetratricopeptide repeats 3                                                                                                                                                                                                                  |
| IFNA16              | -3.16 | -1.38 | 0.28  | 3.53E-05 | 0.0003 | interferon, alpha 16                                                                                                                                                                                                                                                         |
| IFNLR1              | 3.02  | 0.39  | -1.2  | 7.43E-06 | 0.0002 | interferon, lambda receptor 1                                                                                                                                                                                                                                                |
| IFT172              | 3.26  | 0.32  | -1.38 | 3.43E-06 | 0.0002 | intraflagellar transport 172                                                                                                                                                                                                                                                 |
| IGFBP2              | 3.26  | 0.41  | -1.29 | 5.00E-06 | 0.0002 | insulin like growth factor binding protein 2                                                                                                                                                                                                                                 |
| IGFBP6              | 3.16  | 0.37  | -1.29 | 1.55E-05 | 0.0002 | insulin like growth factor binding protein 6                                                                                                                                                                                                                                 |
| IGFBPL1             | 3.42  | 0.37  | -1.4  | 4.33E-05 | 0.0003 | insulin like growth factor binding protein-like 1                                                                                                                                                                                                                            |
| IGFN1               | -3.02 | -1.3  | 0.3   | 3.04E-05 | 0.0003 | immunoglobulin-like and fibronectin type III domain containing 1                                                                                                                                                                                                             |
| '3-53; IGHV3-35; IC | 3.38  | 0.36  | -1.4  | 3.06E-06 | 0.0002 | immunoglobulin heavy constant alpha 1; immunoglobulin heavy variable 3-72; immunoglobulin heavy variable 3-53; immunoglobulin heavy variable 3-35 (non-functional); immunoglobulin heavy variable 3-38 (non-functional); immunoglobulin heavy variable 3-OR16-7 (pseudogene) |
| 3HV3-53; IGHV3-3    | 3.44  | 0.35  | -1.44 | 2.92E-06 | 0.0002 |                                                                                                                                                                                                                                                                              |
| 3KV1D-33; IGKV1D    | -3.23 | -1.35 | 0.35  | 7.47E-05 | 0.0004 | immunoglobulin kappa variable 1D-43; immunoglobulin kappa variable 1D-33; immunoglobulin kappa variable 1D-17; immunoglobulin kappa variable 1-33                                                                                                                            |
| IGKV2D-30           | -3.14 | -1.37 | 0.28  | 1.04E-05 | 0.0002 | immunoglobulin kappa variable 2D-30                                                                                                                                                                                                                                          |
| KV2D-30; IGKV2D-    | -3.15 | -1.38 | 0.27  | 2.08E-05 | 0.0002 | immunoglobulin kappa variable 2D-30; immunoglobulin kappa variable 2D-24 (non-functional)                                                                                                                                                                                    |
| 3LV5-45; IGLV1-40   | 3.13  | 0.26  | -1.39 | 5.67E-06 | 0.0002 |                                                                                                                                                                                                                                                                              |
| IGSF8               | -3.41 | -1.37 | 0.4   | 1.86E-05 | 0.0002 | immunoglobulin superfamily, member 8                                                                                                                                                                                                                                         |
| IGSF9               | -3.18 | -1.28 | 0.39  | 3.89E-06 | 0.0002 | immunoglobulin superfamily, member 9                                                                                                                                                                                                                                         |
| IHH                 | 3.1   | 0.43  | -1.2  | 6.16E-05 | 0.0004 | indian hedgehog                                                                                                                                                                                                                                                              |
| IKBKE               | -3.26 | -1.38 | 0.32  | 0.0001   | 0.0006 | inhibitor of kappa light polypeptide gene enhancer in B-cells, kinase epsilon                                                                                                                                                                                                |
| IKZF1               | 3.41  | 0.37  | -1.4  | 7.23E-06 | 0.0002 | IKAROS family zinc finger 1                                                                                                                                                                                                                                                  |
| IL12A               | -3.01 | -1.31 | 0.28  | 5.37E-06 | 0.0002 | interleukin 12A                                                                                                                                                                                                                                                              |
| IL17B               | 3.19  | 0.47  | -1.2  | 3.68E-06 | 0.0002 | interleukin 17B                                                                                                                                                                                                                                                              |
| IL17RC              | 3.38  | 0.33  | -1.43 | 8.37E-06 | 0.0002 | interleukin 17 receptor C                                                                                                                                                                                                                                                    |
| IL22RA2             | -3.06 | -1.37 | 0.24  | 6.85E-06 | 0.0002 | interleukin 22 receptor, alpha 2                                                                                                                                                                                                                                             |
| IL23A               | 3.18  | 0.24  | -1.43 | 8.99E-06 | 0.0002 | interleukin 23, alpha subunit p19                                                                                                                                                                                                                                            |
| IL27                | 3.09  | 0.42  | -1.2  | 0.0002   | 0.0008 | interleukin 27                                                                                                                                                                                                                                                               |
| IL33                | -3.15 | -1.33 | 0.32  | 4.14E-05 | 0.0003 | interleukin 33                                                                                                                                                                                                                                                               |
| IL34                | -3.12 | -1.36 | 0.28  | 2.24E-05 | 0.0002 | interleukin 34                                                                                                                                                                                                                                                               |
| ILDR2               | 3.25  | 0.31  | -1.39 | 3.48E-06 | 0.0002 | immunoglobulin-like domain containing receptor 2                                                                                                                                                                                                                             |
| IMP4                | -3.34 | -1.3  | 0.44  | 1.04E-05 | 0.0002 | IMP4 homolog, U3 small nucleolar ribonucleoprotein                                                                                                                                                                                                                           |

|                  |       |       |       |          |        |                                                                                      |
|------------------|-------|-------|-------|----------|--------|--------------------------------------------------------------------------------------|
| IMPA1            | 3.55  | 0.43  | -1.4  | 1.68E-05 | 0.0002 | inositol(myo)-1(or 4)-monophosphatase 1                                              |
| ING1             | -3.11 | -1.28 | 0.36  | 4.66E-05 | 0.0003 | inhibitor of growth family member 1                                                  |
| ING5             | 3.46  | 0.39  | -1.4  | 5.65E-06 | 0.0002 | inhibitor of growth family member 5                                                  |
| ING5             | 3.21  | 0.39  | -1.29 | 1.30E-05 | 0.0002 | inhibitor of growth family member 5                                                  |
| INHBB            | 3.26  | 0.32  | -1.38 | 6.24E-06 | 0.0002 | inhibin beta B                                                                       |
| INIP             | -3.16 | -1.38 | 0.28  | 4.84E-06 | 0.0002 | INTS3 and NABP interacting protein                                                   |
| INO80E           | -3.12 | -1.36 | 0.28  | 1.14E-05 | 0.0002 | INO80 complex subunit E                                                              |
| INPP5K           | 3.34  | 0.36  | -1.38 | 5.15E-05 | 0.0004 | inositol polyphosphate-5-phosphatase K                                               |
| INSL5            | -3.36 | -1.38 | 0.36  | 0.0001   | 0.0006 | insulin-like 5                                                                       |
| INTS4P2; INTS4P1 | -3.1  | -1.31 | 0.32  | 7.21E-06 | 0.0002 | integrator complex subunit 4 pseudogene 2; integrator complex subunit 4 pseudogene 1 |
| INTS6            | -3.26 | -1.38 | 0.32  | 3.98E-05 | 0.0003 | integrator complex subunit 6                                                         |
| IPMK             | 3.72  | 0.45  | -1.44 | 2.15E-05 | 0.0002 | inositol polyphosphate multikinase                                                   |
| IPO5             | 3.21  | 0.39  | -1.29 | 3.75E-06 | 0.0002 | importin 5                                                                           |
| IPO7             | 3.2   | 0.3   | -1.38 | 1.73E-05 | 0.0002 | importin 7                                                                           |
| IPO9             | -3.02 | -1.3  | 0.3   | 2.32E-05 | 0.0002 | importin 9                                                                           |
| IQGAP3           | 3.2   | 0.28  | -1.4  | 5.63E-06 | 0.0002 | IQ motif containing GTPase activating protein 3                                      |
| IQSEC3           | 3.02  | 0.39  | -1.2  | 0.0001   | 0.0006 | IQ motif and Sec7 domain 3                                                           |
| IRAK1            | -3.08 | -1.4  | 0.23  | 1.85E-05 | 0.0002 | interleukin 1 receptor associated kinase 1                                           |
| ISCA2            | -3.44 | -1.46 | 0.32  | 8.92E-06 | 0.0002 | iron-sulfur cluster assembly 2                                                       |
| ISG20            | -3.06 | -1.32 | 0.29  | 5.89E-06 | 0.0002 | interferon stimulated exonuclease gene 20kDa                                         |
| ISLR             | 3.26  | 0.32  | -1.38 | 8.28E-06 | 0.0002 | immunoglobulin superfamily containing leucine-rich repeat                            |
| ITGB1            | 3.46  | 0.39  | -1.4  | 2.68E-06 | 0.0002 | integrin beta 1                                                                      |
| ITPKC            | 3.42  | 0.39  | -1.38 | 2.79E-06 | 0.0002 | inositol-trisphosphate 3-kinase C                                                    |
| JPH1             | 3.49  | 0.32  | -1.48 | 8.07E-06 | 0.0002 | junctophilin 1                                                                       |
| JPH2             | 3.06  | 0.32  | -1.29 | 1.78E-05 | 0.0002 | junctophilin 2                                                                       |
| JRK              | -3.11 | -1.31 | 0.32  | 0.0002   | 0.0008 | Jrk helix-turn-helix protein                                                         |
| JUNB             | 3.32  | 0.44  | -1.29 | 0.0001   | 0.0006 | jun B proto-oncogene                                                                 |
| KANK1            | -3.09 | -1.36 | 0.26  | 1.17E-05 | 0.0002 | KN motif and ankyrin repeat domains 1                                                |
| KAT7             | -3.22 | -1.28 | 0.4   | 1.52E-05 | 0.0002 | K(lysine) acetyltransferase 7                                                        |
| KATNA1           | -3.16 | -1.38 | 0.28  | 0.0001   | 0.0005 | katanin p60 (ATPase containing) subunit A 1                                          |
| KBTBD13          | -3.05 | -1.33 | 0.28  | 7.55E-05 | 0.0004 | kelch repeat and BTB (POZ) domain containing 13                                      |
| KBTBD8           | -3.05 | -1.32 | 0.29  | 0.0002   | 0.0009 | kelch repeat and BTB (POZ) domain containing 8                                       |
| KCNAB3           | 3.02  | 0.39  | -1.2  | 6.05E-06 | 0.0002 | potassium channel, voltage gated subfamily A regulatory beta subunit 3               |
| KCNC4            | 3.38  | 0.36  | -1.4  | 2.30E-05 | 0.0002 | potassium channel, voltage gated Shaw related subfamily C, member 4                  |
| KCNG1            | 3.21  | 0.28  | -1.4  | 2.36E-05 | 0.0002 | potassium channel, voltage gated modifier subfamily G, member 1                      |
| KCNJ8            | -3.12 | -1.36 | 0.28  | 0.0002   | 0.0008 | potassium channel, inwardly rectifying subfamily J, member 8                         |
| KCNK13           | 3.33  | 0.33  | -1.4  | 2.05E-05 | 0.0002 | potassium channel, two pore domain subfamily K, member 13                            |
| KCNK18           | 3.37  | 0.37  | -1.38 | 1.31E-05 | 0.0002 | potassium channel, two pore domain subfamily K, member 18                            |

|                  |       |       |       |          |        |                                                                                                                                                                    |
|------------------|-------|-------|-------|----------|--------|--------------------------------------------------------------------------------------------------------------------------------------------------------------------|
| KCNK9            | -3.06 | -1.34 | 0.28  | 1.04E-05 | 0.0002 | potassium channel, two pore domain subfamily K, member 9                                                                                                           |
| KCNQ2            | -3.04 | -1.3  | 0.31  | 8.27E-05 | 0.0005 | potassium channel, voltage gated KQT-like subfamily Q, member 2                                                                                                    |
| KCNS3            | -3.08 | -1.36 | 0.26  | 3.00E-05 | 0.0003 | potassium voltage-gated channel, modifier subfamily S, member 3                                                                                                    |
| KCTD12           | 3.52  | 0.43  | -1.38 | 9.65E-06 | 0.0002 | potassium channel tetramerization domain containing 12                                                                                                             |
| KCTD13           | -3.23 | -1.41 | 0.28  | 0.0001   | 0.0006 | potassium channel tetramerization domain containing 13                                                                                                             |
| KCTD2            | -3.03 | -1.32 | 0.28  | 7.78E-06 | 0.0002 | potassium channel tetramerization domain containing 2                                                                                                              |
| KCTD20           | -3.04 | -1.28 | 0.32  | 9.13E-06 | 0.0002 | potassium channel tetramerization domain containing 20                                                                                                             |
| KCTD21           | 3.3   | 0.33  | -1.39 | 4.30E-06 | 0.0002 | potassium channel tetramerization domain containing 21                                                                                                             |
| KCTD4            | 3.02  | 0.39  | -1.2  | 0.0001   | 0.0007 | potassium channel tetramerization domain containing 4                                                                                                              |
| KCTD7            | -3.4  | -1.38 | 0.38  | 1.58E-05 | 0.0002 | potassium channel tetramerization domain containing 7                                                                                                              |
| KDM5A            | 3.1   | 0.43  | -1.2  | 1.65E-05 | 0.0002 | lysine (K)-specific demethylase 5A                                                                                                                                 |
| KDM8             | -3.04 | -1.36 | 0.24  | 3.83E-05 | 0.0003 | lysine (K)-specific demethylase 8                                                                                                                                  |
| KEAP1            | -3.11 | -1.31 | 0.33  | 9.64E-06 | 0.0002 | kelch-like ECH-associated protein 1                                                                                                                                |
| KHDRBS3          | -3.13 | -1.28 | 0.36  | 4.10E-05 | 0.0003 | KH domain containing, RNA binding, signal transduction associated 3                                                                                                |
| KIAA0355         | 3.18  | 0.25  | -1.42 | 5.40E-06 | 0.0002 | KIAA0355                                                                                                                                                           |
| KIAA0391         | -3.03 | -1.36 | 0.24  | 5.55E-06 | 0.0002 | KIAA0391                                                                                                                                                           |
| KIAA0895L        | -3.43 | -1.42 | 0.36  | 2.02E-05 | 0.0002 | KIAA0895-like                                                                                                                                                      |
| KIAA1549L        | 3.16  | 0.23  | -1.43 | 1.01E-05 | 0.0002 | KIAA1549-like                                                                                                                                                      |
| KIAA1671         | -3.26 | -1.31 | 0.39  | 0.0002   | 0.0007 | KIAA1671                                                                                                                                                           |
| KIAA1683         | 3.63  | 0.43  | -1.43 | 7.19E-06 | 0.0002 | KIAA1683                                                                                                                                                           |
| KIAA1755         | 3.35  | 0.34  | -1.4  | 5.78E-05 | 0.0004 | KIAA1755                                                                                                                                                           |
| KIAA2013         | -3.25 | -1.39 | 0.31  | 3.12E-05 | 0.0003 | KIAA2013                                                                                                                                                           |
| KIF18B           | -3.17 | -1.41 | 0.26  | 1.66E-05 | 0.0002 | kinesin family member 18B                                                                                                                                          |
| KIF19            | 3.37  | 0.35  | -1.4  | 9.54E-06 | 0.0002 | kinesin family member 19                                                                                                                                           |
| KIF1C            | 3.02  | 0.39  | -1.2  | 0.0002   | 0.0008 | kinesin family member 1C                                                                                                                                           |
| KIF2C            | -3.11 | -1.36 | 0.27  | 6.51E-06 | 0.0002 | kinesin family member 2C                                                                                                                                           |
| KIF3B            | -3.01 | -1.33 | 0.26  | 4.45E-06 | 0.0002 | kinesin family member 3B                                                                                                                                           |
| KIFAP3           | -3.11 | -1.41 | 0.23  | 2.67E-05 | 0.0003 | kinesin-associated protein 3                                                                                                                                       |
| KIR3DL3; KIR2DL2 | 3.91  | 0.49  | -1.48 | 9.25E-06 | 0.0002 | killer cell immunoglobulin-like receptor, three domains, long cytoplasmic tail, 3; killer cell immunoglobulin-like receptor, two domains, long cytoplasmic tail, 2 |
| KIRREL3-AS3      | 3.1   | 0.43  | -1.2  | 1.08E-05 | 0.0002 | KIRREL3 antisense RNA 3                                                                                                                                            |
| KITLG            | -3.33 | -1.37 | 0.36  | 1.05E-05 | 0.0002 | KIT ligand                                                                                                                                                         |
| KLF15            | 3.42  | 0.39  | -1.38 | 4.72E-05 | 0.0003 | Kruppel-like factor 15                                                                                                                                             |
| KLF4             | 3.26  | 0.32  | -1.38 | 2.18E-05 | 0.0002 | Kruppel-like factor 4 (gut)                                                                                                                                        |
| KLF9             | 3.23  | 0.3   | -1.39 | 6.53E-06 | 0.0002 | Kruppel-like factor 9                                                                                                                                              |
| KLHDC4           | -3.11 | -1.31 | 0.32  | 0.0004   | 0.0017 | kelch domain containing 4                                                                                                                                          |
| KLHDC7A          | 3.44  | 0.38  | -1.4  | 7.91E-06 | 0.0002 | kelch domain containing 7A                                                                                                                                         |
| KLHL11           | -3.22 | -1.28 | 0.4   | 1.95E-05 | 0.0002 | kelch-like family member 11                                                                                                                                        |
| KLHL22           | 3.23  | 0.29  | -1.4  | 3.29E-05 | 0.0003 | kelch-like family member 22                                                                                                                                        |

|                  |       |       |       |          |        |                                                                                                           |
|------------------|-------|-------|-------|----------|--------|-----------------------------------------------------------------------------------------------------------|
| KLHL33           | -3.12 | -1.41 | 0.23  | 3.56E-05 | 0.0003 | kelch-like family member 33                                                                               |
| KLK1             | 3.07  | 0.42  | -1.2  | 1.57E-05 | 0.0002 | kallikrein 1                                                                                              |
| KLK10            | 3.19  | 0.47  | -1.2  | 5.92E-05 | 0.0004 | kallikrein related peptidase 10                                                                           |
| KLK11            | 3.01  | 0.39  | -1.2  | 5.22E-06 | 0.0002 | kallikrein related peptidase 11                                                                           |
| KLK15            | 3.16  | 0.28  | -1.38 | 5.62E-06 | 0.0002 | kallikrein related peptidase 15                                                                           |
| KLK9; KLK8       | -3.1  | -1.38 | 0.25  | 4.81E-05 | 0.0003 | kallikrein related peptidase 9; kallikrein related peptidase 8                                            |
| KPNA2            | 3.41  | 0.32  | -1.44 | 3.88E-05 | 0.0003 | karyopherin alpha 2 (RAG cohort 1, importin alpha 1)                                                      |
| KPNA2            | 3.47  | 0.32  | -1.47 | 6.93E-05 | 0.0004 | karyopherin alpha 2 (RAG cohort 1, importin alpha 1)                                                      |
| KRT18P20         | 3.63  | 0.43  | -1.43 | 1.57E-05 | 0.0002 | keratin 18 pseudogene 20                                                                                  |
| KRT18P55         | -3.01 | -1.28 | 0.31  | 7.83E-05 | 0.0005 | keratin 18 pseudogene 55                                                                                  |
| KRT33B           | -3.01 | -1.38 | 0.21  | 1.07E-05 | 0.0002 | keratin 33B, type I                                                                                       |
| KRT82            | 3.2   | 0.28  | -1.4  | 1.97E-05 | 0.0002 | keratin 82, type II                                                                                       |
| KRT9             | 3.2   | 0.39  | -1.29 | 9.60E-06 | 0.0002 | keratin 9, type I                                                                                         |
| KRTAP12-1        | -3.23 | -1.41 | 0.28  | 1.08E-05 | 0.0002 | keratin associated protein 12-1                                                                           |
| RTAP1-4; KRTAP1- | -3.19 | -1.4  | 0.28  | 0.0001   | 0.0006 | keratin associated protein 1-4; keratin associated protein 1-5                                            |
| TAP19-6; KRTAP19 | -3.06 | -1.4  | 0.22  | 2.10E-05 | 0.0002 | keratin associated protein 19-6; keratin associated protein 19-7                                          |
| KRTAP23-1        | 3.3   | 0.32  | -1.4  | 8.83E-06 | 0.0002 | keratin associated protein 23-1                                                                           |
| KRTAP5-6         | -3.04 | -1.28 | 0.32  | 6.40E-06 | 0.0002 | keratin associated protein 5-6                                                                            |
| RTAP5-9; KRTAP5- | 3.37  | 0.35  | -1.4  | 7.23E-05 | 0.0004 | keratin associated protein 5-9; keratin associated protein 5-8                                            |
| KRTAP6-1         | -3.25 | -1.28 | 0.42  | 2.43E-05 | 0.0002 | keratin associated protein 6-1                                                                            |
| KRTAP9-3         | 3.21  | 0.27  | -1.41 | 9.45E-06 | 0.0002 | keratin associated protein 9-3                                                                            |
| KRTCAP2          | -3.01 | -1.31 | 0.28  | 2.09E-05 | 0.0002 | keratinocyte associated protein 2                                                                         |
| KXD1             | 3.49  | 0.42  | -1.38 | 8.03E-06 | 0.0002 | KxDL motif containing 1                                                                                   |
| KY               | 3.65  | 0.43  | -1.44 | 3.87E-06 | 0.0002 | kyphoscoliosis peptidase                                                                                  |
| L3MBTL1          | -3.07 | -1.33 | 0.29  | 1.11E-05 | 0.0002 | l(3)mbt-like 1 (Drosophila)                                                                               |
| LACC1            | -3.22 | -1.36 | 0.33  | 8.50E-05 | 0.0005 | laccase (multicopper oxidoreductase) domain containing 1                                                  |
| LAMA4            | 3.26  | 0.32  | -1.38 | 9.34E-06 | 0.0002 | laminin, alpha 4                                                                                          |
| LARP1            | 3.43  | 0.4   | -1.38 | 3.80E-06 | 0.0002 | La ribonucleoprotein domain family, member 1                                                              |
| LAYN             | 3.33  | 0.32  | -1.41 | 3.35E-06 | 0.0002 | layilin                                                                                                   |
| LCAT; SLC12A4    | -3.22 | -1.28 | 0.4   | 0.0002   | 0.0010 | lecithin-cholesterol acyltransferase; solute carrier family 12 (potassium/chloride transporter), member 4 |
| LCE1E            | 3.7   | 0.51  | -1.38 | 4.65E-06 | 0.0002 | late cornified envelope 1E                                                                                |
| LCMT1            | -3.15 | -1.33 | 0.32  | 0.0001   | 0.0005 | leucine carboxyl methyltransferase 1                                                                      |
| LCMT2            | 3.16  | 0.26  | -1.4  | 2.46E-05 | 0.0002 | leucine carboxyl methyltransferase 2                                                                      |
| LCN6             | -3.1  | -1.28 | 0.35  | 5.18E-06 | 0.0002 | lipocalin 6                                                                                               |
| LCP2             | -3.11 | -1.31 | 0.33  | 9.60E-06 | 0.0002 | lymphocyte cytosolic protein 2                                                                            |
| LDB1             | -3.09 | -1.28 | 0.35  | 1.15E-05 | 0.0002 | LIM domain binding 1                                                                                      |
| LDLR             | 3.1   | 0.23  | -1.4  | 1.72E-05 | 0.0002 | low density lipoprotein receptor                                                                          |
| LDOC1L           | -3.27 | -1.39 | 0.32  | 4.89E-05 | 0.0003 | leucine zipper, down-regulated in cancer 1-like                                                           |

|                   |       |       |       |          |        |                                                                                          |
|-------------------|-------|-------|-------|----------|--------|------------------------------------------------------------------------------------------|
| LENG9             | 3.33  | 0.32  | -1.41 | 5.56E-06 | 0.0002 | leukocyte receptor cluster (LRC) member 9                                                |
| LGALS8-AS1        | -3.11 | -1.3  | 0.34  | 6.73E-05 | 0.0004 | LGALS8 antisense RNA 1                                                                   |
| LGALS9C           | 3.3   | 0.32  | -1.4  | 4.89E-06 | 0.0002 | lectin, galactoside-binding, soluble, 9C                                                 |
| LGALSL            | -3.02 | -1.31 | 0.28  | 0.0001   | 0.0006 | lectin, galactoside-binding-like                                                         |
| LGI3              | -3.37 | -1.3  | 0.46  | 2.65E-05 | 0.0003 | leucine-rich repeat LGI family, member 3                                                 |
| LIF               | -3.24 | -1.33 | 0.36  | 2.20E-05 | 0.0002 | leukemia inhibitory factor                                                               |
| LILRA1            | 3.33  | 0.35  | -1.38 | 2.98E-05 | 0.0003 | leukocyte immunoglobulin-like receptor, subfamily A (with TM domain), member 1           |
| LILRB1            | 3.63  | 0.43  | -1.43 | 1.11E-05 | 0.0002 | leukocyte immunoglobulin-like receptor, subfamily B (with TM and ITIM domains), member 1 |
| LIMD1-AS1         | -3.72 | -1.28 | 0.61  | 6.91E-05 | 0.0004 | LIMD1 antisense RNA 1                                                                    |
| LIN9              | -3.09 | -1.31 | 0.32  | 1.57E-05 | 0.0002 | lin-9 DREAM MuvB core complex component                                                  |
| LINC00152         | 3.01  | 0.21  | -1.38 | 1.03E-05 | 0.0002 | long intergenic non-protein coding RNA 152                                               |
| LINC00268         | -3.16 | -1.36 | 0.3   | 7.21E-06 | 0.0002 | long intergenic non-protein coding RNA 268                                               |
| LINC00310         | 3.11  | 0.21  | -1.43 | 9.67E-06 | 0.0002 | long intergenic non-protein coding RNA 310                                               |
| LINC00313         | 3.16  | 0.28  | -1.38 | 1.02E-05 | 0.0002 | long intergenic non-protein coding RNA 313                                               |
| LINC00472         | 3.11  | 0.32  | -1.31 | 3.40E-05 | 0.0003 | long intergenic non-protein coding RNA 472                                               |
| LINC00518         | -3.23 | -1.43 | 0.26  | 1.75E-05 | 0.0002 | long intergenic non-protein coding RNA 518                                               |
| LINC00523         | -3.12 | -1.36 | 0.28  | 1.14E-05 | 0.0002 | long intergenic non-protein coding RNA 523                                               |
| LINC00544         | 3.3   | 0.32  | -1.4  | 7.07E-05 | 0.0004 | long intergenic non-protein coding RNA 544                                               |
| LINC00649         | -3.14 | -1.3  | 0.36  | 6.71E-06 | 0.0002 | long intergenic non-protein coding RNA 649                                               |
| LINC00656         | -3.03 | -1.32 | 0.28  | 6.38E-06 | 0.0002 | long intergenic non-protein coding RNA 656                                               |
| LINC00998         | -3.13 | -1.28 | 0.36  | 5.08E-05 | 0.0003 | long intergenic non-protein coding RNA 998                                               |
| NC01106; LINC0111 | -3.12 | -1.34 | 0.31  | 2.02E-05 | 0.0002 | long intergenic non-protein coding RNA 1106; long intergenic non-protein coding RNA 1123 |
| LINC01123         | 3.35  | 0.42  | -1.32 | 2.06E-05 | 0.0002 | long intergenic non-protein coding RNA 1123                                              |
| NC01287; ERVFC1-  | 3.26  | 0.28  | -1.43 | 7.94E-06 | 0.0002 | long intergenic non-protein coding RNA 1287; endogenous retrovirus group FC1, member 1   |
| LINC01446         | 3.14  | 0.36  | -1.29 | 3.93E-06 | 0.0002 | long intergenic non-protein coding RNA 1446                                              |
| LIPE              | 3.37  | 0.32  | -1.43 | 2.68E-05 | 0.0003 | lipase, hormone-sensitive                                                                |
| LLPH              | -3.01 | -1.28 | 0.31  | 4.23E-05 | 0.0003 | LLP homolog, long-term synaptic facilitation (Aplysia)                                   |
| LMCD1             | 3.28  | 0.33  | -1.38 | 2.79E-06 | 0.0002 | LIM and cysteine-rich domains 1                                                          |
| LMOD3             | -3.06 | -1.33 | 0.28  | 6.10E-05 | 0.0004 | leiomodrin 3 (fetal)                                                                     |
| LOC100049716      | 3.27  | 0.24  | -1.47 | 9.80E-06 | 0.0002 | uncharacterized LOC100049716                                                             |
| LOC100128356      | -3.03 | -1.3  | 0.3   | 1.20E-05 | 0.0002 | protein transactivated by hepatitis B virus E antigen                                    |
| LOC100129884      | 3.12  | 0.34  | -1.3  | 9.74E-06 | 0.0002 | uncharacterized LOC100129884                                                             |
| LOC100130264      | -3.06 | -1.31 | 0.3   | 6.27E-06 | 0.0002 | uncharacterized LOC100130264                                                             |
| LOC100130370      | -3.1  | -1.36 | 0.27  | 2.72E-05 | 0.0003 | uncharacterized LOC100130370                                                             |
| LOC100130507      | -3.11 | -1.31 | 0.32  | 1.22E-05 | 0.0002 | uncharacterized LOC100130507                                                             |
| LOC100131195      | 3.1   | 0.23  | -1.4  | 3.60E-05 | 0.0003 | uncharacterized LOC100131195                                                             |
| LOC100131510      | 3.24  | 0.49  | -1.2  | 4.13E-06 | 0.0002 | uncharacterized LOC100131510                                                             |
| LOC100132014      | -3.31 | -1.36 | 0.36  | 4.97E-05 | 0.0003 | uncharacterized LOC100132014                                                             |

|                       |       |       |       |          |        |                                                                                                                        |
|-----------------------|-------|-------|-------|----------|--------|------------------------------------------------------------------------------------------------------------------------|
| LOC100132319          | -3.07 | -1.36 | 0.25  | 0.0001   | 0.0007 | uncharacterized LOC100132319                                                                                           |
| LOC100287792          | 3.38  | 0.38  | -1.38 | 9.51E-06 | 0.0002 | uncharacterized LOC100287792                                                                                           |
| LOC100288208          | 3.59  | 0.44  | -1.4  | 2.89E-05 | 0.0003 | uncharacterized LOC100288208                                                                                           |
| LOC100288884          | 3.3   | 0.34  | -1.38 | 3.30E-06 | 0.0002 | uncharacterized LOC100288884                                                                                           |
| LOC100506730          | 3.64  | 0.39  | -1.47 | 3.57E-06 | 0.0002 | uncharacterized LOC100506730                                                                                           |
| LOC100996325          | -3.16 | -1.38 | 0.28  | 3.40E-05 | 0.0003 | uncharacterized LOC100996325                                                                                           |
| LOC100996455          | 3.31  | 0.29  | -1.44 | 7.38E-06 | 0.0002 | uncharacterized LOC100996455                                                                                           |
| LOC101927263          | 3.26  | 0.32  | -1.38 | 1.62E-05 | 0.0002 | uncharacterized LOC101927263                                                                                           |
| LOC101928673          | -3.13 | -1.28 | 0.36  | 9.97E-06 | 0.0002 | uncharacterized LOC101928673                                                                                           |
| LOC101928879          | -3.18 | -1.36 | 0.3   | 4.78E-06 | 0.0002 | COMM domain-containing protein 5-like                                                                                  |
| LOC101928885          | -3.03 | -1.28 | 0.32  | 1.16E-05 | 0.0002 | uncharacterized LOC101928885                                                                                           |
| LOC101930026          | 3.46  | 0.39  | -1.4  | 4.23E-06 | 0.0002 | uncharacterized LOC101930026                                                                                           |
| LOC101930026          | 3.44  | 0.39  | -1.39 | 5.72E-06 | 0.0002 | uncharacterized LOC101930026                                                                                           |
| LOC102723462          | 3.37  | 0.32  | -1.43 | 1.02E-05 | 0.0002 | uncharacterized LOC102723462                                                                                           |
| LOC102723968          | -3.06 | -1.39 | 0.23  | 0.0009   | 0.0034 | uncharacterized LOC102723968                                                                                           |
| LOC102724970; LOC1001 | 3.28  | 0.33  | -1.38 | 5.68E-05 | 0.0004 | putative uncharacterized protein FLJ35883; uncharacterized LOC100133616                                                |
| LOC102724970; LOC1001 | 3.28  | 0.33  | -1.38 | 5.68E-05 | 0.0004 | putative uncharacterized protein FLJ35883; uncharacterized LOC100133616                                                |
| LOC102724984; LOC72   | 3.01  | 0.21  | -1.38 | 1.21E-05 | 0.0002 | uncharacterized protein KIAA2013; KIAA2013 pseudogene                                                                  |
| LOC102725001          | 3.2   | 0.28  | -1.4  | 1.06E-05 | 0.0002 | putative ankyrin repeat domain-containing protein 20A5                                                                 |
| LOC102725258; DKFZP77 | -3.08 | -1.3  | 0.33  | 0.0002   | 0.0009 | uncharacterized LOC102725258; uncharacterized LOC643162                                                                |
| LOC105369190; LOC17   | 3.45  | 0.38  | -1.4  | 1.03E-05 | 0.0002 | uncharacterized LOC105369190; uncharacterized LOC171391                                                                |
| LOC105369520          | -3.12 | -1.36 | 0.28  | 5.86E-06 | 0.0002 | uncharacterized LOC105369520                                                                                           |
| LOC105370792          | 3.11  | 0.22  | -1.41 | 3.13E-06 | 0.0002 | uncharacterized LOC105370792                                                                                           |
| LOC105371034; LOC1053 | 3.52  | 0.43  | -1.38 | 7.89E-06 | 0.0002 | uncharacterized LOC105371033; uncharacterized LOC105371034; uncharacterized LOC105371035; uncharacterized LOC105371030 |
| LOC105371034; LOC1053 | 3.52  | 0.43  | -1.38 | 7.89E-06 | 0.0002 | uncharacterized LOC105371033; uncharacterized LOC105371034; uncharacterized LOC105371035; uncharacterized LOC105371030 |
| LOC105371034; LOC1053 | 3.52  | 0.43  | -1.38 | 7.89E-06 | 0.0002 | uncharacterized LOC105371033; uncharacterized LOC105371034; uncharacterized LOC105371035; uncharacterized LOC105371030 |
| LOC105371035; LOC1053 | 3.73  | 0.51  | -1.39 | 2.25E-05 | 0.0002 | uncharacterized LOC105371034; uncharacterized LOC105371035; uncharacterized LOC105371030                               |
| LOC105371035; LOC1053 | 3.56  | 0.43  | -1.4  | 7.13E-05 | 0.0004 | uncharacterized LOC105371034; uncharacterized LOC105371035; uncharacterized LOC105371030                               |
| LOC105371035; LOC1053 | 3.56  | 0.43  | -1.4  | 7.13E-05 | 0.0004 | uncharacterized LOC105371034; uncharacterized LOC105371035; uncharacterized LOC105371030                               |
| LOC105371215; FLJ37   | 3.26  | 0.32  | -1.38 | 2.35E-05 | 0.0002 | uncharacterized LOC105371215; uncharacterized LOC642691                                                                |
| LOC105375091; LOC1002 | 3.23  | 0.29  | -1.4  | 1.02E-05 | 0.0002 | uncharacterized LOC105375091; uncharacterized LOC100287869                                                             |
| LOC105378913          | 3.26  | 0.32  | -1.38 | 2.73E-05 | 0.0003 | uncharacterized LOC105378913                                                                                           |
| LOC150596             | -3.32 | -1.45 | 0.28  | 6.67E-05 | 0.0004 | uncharacterized LOC150596                                                                                              |
| LOC157740             | 3.86  | 0.52  | -1.43 | 5.59E-06 | 0.0002 | uncharacterized protein C8orf9                                                                                         |
| LOC401281; LOC10537   | -3.17 | -1.31 | 0.35  | 2.36E-05 | 0.0002 | uncharacterized LOC401281; uncharacterized LOC105378085                                                                |
| LOC401589; LOC10012   | -3.02 | -1.28 | 0.32  | 1.53E-05 | 0.0002 | uncharacterized LOC401589; uncharacterized LOC100129860                                                                |
| LOC401589; LOC10012   | -3.02 | -1.28 | 0.32  | 1.53E-05 | 0.0002 | uncharacterized LOC401589; uncharacterized LOC100129860                                                                |
| LOC441728             | -3.2  | -1.31 | 0.36  | 9.56E-06 | 0.0002 | golgin-like                                                                                                            |



|                |       |       |       |          |        |                                                                            |
|----------------|-------|-------|-------|----------|--------|----------------------------------------------------------------------------|
| LOC494141      | -3.19 | -1.36 | 0.31  | 4.30E-05 | 0.0003 | solute carrier family 25, member 51 pseudogene                             |
| LOC554207      | -3.06 | -1.31 | 0.3   | 1.03E-05 | 0.0002 | uncharacterized LOC554207                                                  |
| LOC643549      | 3.52  | 0.43  | -1.38 | 3.49E-06 | 0.0002 | uncharacterized LOC643549                                                  |
| LOC644172      | -3.08 | -1.36 | 0.26  | 3.97E-05 | 0.0003 | mitogen-activated protein kinase 8 interacting protein 1 pseudogene        |
| LOC645261      | 3.59  | 0.46  | -1.38 | 1.09E-05 | 0.0002 | PP565                                                                      |
| LOC646471      | -3.31 | -1.33 | 0.4   | 0.0005   | 0.0021 | uncharacterized LOC646471                                                  |
| LOC653653      | 3.26  | 0.32  | -1.38 | 7.03E-05 | 0.0004 | adaptor-related protein complex 1, sigma 2 subunit pseudogene              |
| LOC728283      | -3.36 | -1.38 | 0.36  | 1.33E-05 | 0.0002 | uncharacterized LOC728283                                                  |
| LOC90768       | 3.42  | 0.39  | -1.38 | 1.87E-05 | 0.0002 | uncharacterized LOC90768                                                   |
| LOXL3          | 3.19  | 0.29  | -1.38 | 2.57E-05 | 0.0003 | lysyl oxidase-like 3                                                       |
| LPAL2          | 3.1   | 0.43  | -1.2  | 0.0002   | 0.0009 | lipoprotein, Lp(a)-like 2, pseudogene                                      |
| LRFN4          | 3.1   | 0.43  | -1.2  | 3.13E-06 | 0.0002 | leucine rich repeat and fibronectin type III domain containing 4           |
| LRIG1          | -3.21 | -1.41 | 0.27  | 0.0002   | 0.0009 | leucine-rich repeats and immunoglobulin-like domains 1                     |
| LRIT3          | -3.01 | -1.31 | 0.28  | 0.0002   | 0.0009 | leucine-rich repeat, immunoglobulin-like and transmembrane domains 3       |
| LRRC10         | -3.01 | -1.38 | 0.21  | 1.02E-05 | 0.0002 | leucine rich repeat containing 10                                          |
| LRRC27         | 3.16  | 0.22  | -1.44 | 1.03E-05 | 0.0002 | leucine rich repeat containing 27                                          |
| LRRC34         | 3.46  | 0.32  | -1.47 | 2.85E-05 | 0.0003 | leucine rich repeat containing 34                                          |
| LRRC4          | -3.25 | -1.38 | 0.32  | 2.22E-05 | 0.0002 | leucine rich repeat containing 4                                           |
| LRRC4C         | 3.26  | 0.32  | -1.38 | 9.94E-06 | 0.0002 | leucine rich repeat containing 4C                                          |
| LRRC57         | 3.19  | 0.47  | -1.2  | 3.47E-06 | 0.0002 | leucine rich repeat containing 57                                          |
| LRRC58         | 3.06  | 0.32  | -1.29 | 3.92E-06 | 0.0002 | leucine rich repeat containing 58                                          |
| LRRC6          | 3.29  | 0.3   | -1.41 | 2.57E-05 | 0.0003 | leucine rich repeat containing 6                                           |
| LRRC8C         | 3.3   | 0.43  | -1.29 | 1.07E-05 | 0.0002 | leucine rich repeat containing 8 family, member C                          |
| LRRIQ4         | 3.37  | 0.28  | -1.47 | 1.13E-05 | 0.0002 | leucine-rich repeats and IQ motif containing 4                             |
| LRSAM1         | -3.06 | -1.33 | 0.28  | 3.76E-05 | 0.0003 | leucine rich repeat and sterile alpha motif containing 1                   |
| LSM10          | -3.36 | -1.38 | 0.36  | 4.76E-05 | 0.0003 | LSM10, U7 small nuclear RNA associated                                     |
| LSR            | -3.03 | -1.34 | 0.26  | 0.0001   | 0.0007 | lipolysis stimulated lipoprotein receptor                                  |
| LSS            | 3.31  | 0.32  | -1.4  | 5.18E-06 | 0.0002 | lanosterol synthase (2,3-oxidosqualene-lanosterol cyclase)                 |
| LTK            | 3.1   | 0.43  | -1.2  | 1.05E-05 | 0.0002 | leukocyte receptor tyrosine kinase                                         |
| LY6G5B; CSNK2B | -3.06 | -1.33 | 0.28  | 3.30E-06 | 0.0002 | lymphocyte antigen 6 complex, locus G5B; casein kinase 2, beta polypeptide |
| LY6G5B; CSNK2B | -3.01 | -1.31 | 0.28  | 4.19E-06 | 0.0002 | lymphocyte antigen 6 complex, locus G5B; casein kinase 2, beta polypeptide |
| LYN            | -3.04 | -1.28 | 0.32  | 3.99E-05 | 0.0003 | LYN proto-oncogene, Src family tyrosine kinase                             |
| LYRM1          | -3.12 | -1.31 | 0.33  | 0.0002   | 0.0008 | LYR motif containing 1                                                     |
| LYRM2          | -3.11 | -1.31 | 0.32  | 4.29E-05 | 0.0003 | LYR motif containing 2                                                     |
| LZTS1-AS1      | -3.3  | -1.28 | 0.44  | 8.98E-06 | 0.0002 | LZTS1 antisense RNA 1                                                      |
| M1AP           | -3.06 | -1.33 | 0.28  | 9.35E-05 | 0.0005 | meiosis 1 associated protein                                               |
| MAB21L2        | 3.27  | 0.39  | -1.32 | 4.78E-05 | 0.0003 | mab-21-like 2 (C. elegans)                                                 |
| MAFF           | 3.42  | 0.39  | -1.38 | 3.80E-06 | 0.0002 | v-maf avian musculoaponeurotic fibrosarcoma oncogene homolog F             |

|                 |       |       |       |          |        |                                                                                             |
|-----------------|-------|-------|-------|----------|--------|---------------------------------------------------------------------------------------------|
| MAFG            | 3.41  | 0.48  | -1.29 | 2.11E-05 | 0.0002 | v-maf avian musculoaponeurotic fibrosarcoma oncogene homolog G                              |
| MAFG            | -3.15 | -1.36 | 0.29  | 3.40E-05 | 0.0003 | v-maf avian musculoaponeurotic fibrosarcoma oncogene homolog G                              |
| MAGEA6; MAGEA2I | -3.01 | -1.31 | 0.28  | 4.90E-05 | 0.0003 | MAGE family member A2; MAGE family member A6; MAGE family member A2B; MAGE family member A3 |
| MAGEA4          | 3.06  | 0.3   | -1.31 | 2.02E-05 | 0.0002 | MAGE family member A4                                                                       |
| MAGEA6; MAGEA3  | -3.01 | -1.31 | 0.28  | 4.52E-05 | 0.0003 | MAGE family member A6; MAGE family member A3                                                |
| MAGEB17         | -3.23 | -1.41 | 0.28  | 3.44E-05 | 0.0003 | MAGE family member B17                                                                      |
| MAGEB5          | 3.26  | 0.32  | -1.38 | 3.72E-05 | 0.0003 | MAGE family member B5                                                                       |
| MAGI2           | -3.16 | -1.38 | 0.28  | 5.45E-05 | 0.0004 | membrane associated guanylate kinase, WW and PDZ domain containing 2                        |
| MAGIX           | -3.26 | -1.36 | 0.34  | 2.48E-05 | 0.0002 | MAGI family member, X-linked                                                                |
| MALSU1          | -3.36 | -1.38 | 0.36  | 6.92E-05 | 0.0004 | mitochondrial assembly of ribosomal large subunit 1                                         |
| MAMSTR          | -3.15 | -1.31 | 0.34  | 4.74E-06 | 0.0002 | MEF2 activating motif and SAP domain containing transcriptional regulator                   |
| MAN2C1          | -3.16 | -1.38 | 0.28  | 8.35E-05 | 0.0005 | mannosidase, alpha, class 2C, member 1                                                      |
| MAP2K4          | -3.05 | -1.38 | 0.23  | 0.0001   | 0.0007 | mitogen-activated protein kinase kinase 4                                                   |
| MAPK1IP1L       | -3.02 | -1.37 | 0.22  | 4.88E-06 | 0.0002 | mitogen-activated protein kinase 1 interacting protein 1-like                               |
| MAPRE1          | -3.03 | -1.36 | 0.24  | 0.0001   | 0.0006 | microtubule-associated protein, RP/EB family, member 1                                      |
| MAPT-AS1        | 3.28  | 0.39  | -1.32 | 5.37E-06 | 0.0002 | MAPT antisense RNA 1                                                                        |
| MARC2           | 3.31  | 0.32  | -1.4  | 4.58E-05 | 0.0003 | mitochondrial amidoxime reducing component 2                                                |
| MARVELD3        | 3.01  | 0.3   | -1.29 | 4.42E-06 | 0.0002 | MARVEL domain containing 3                                                                  |
| MAS1            | 3.26  | 0.32  | -1.38 | 3.43E-06 | 0.0002 | MAS1 proto-oncogene, G protein-coupled receptor                                             |
| MAST2           | 3.42  | 0.39  | -1.38 | 2.31E-06 | 0.0002 | microtubule associated serine/threonine kinase 2                                            |
| MAT2A           | -3.39 | -1.41 | 0.35  | 2.78E-05 | 0.0003 | methionine adenosyltransferase II, alpha                                                    |
| MATN2           | -3.22 | -1.36 | 0.32  | 1.98E-05 | 0.0002 | matrilin 2                                                                                  |
| MATN3           | -3.2  | -1.31 | 0.36  | 3.95E-05 | 0.0003 | matrilin 3                                                                                  |
| MATN4           | 3.25  | 0.32  | -1.38 | 3.27E-06 | 0.0002 | matrilin 4                                                                                  |
| MAU2            | 3.1   | 0.43  | -1.2  | 3.23E-05 | 0.0003 | MAU2 sister chromatid cohesion factor                                                       |
| MBD3L5; MBD3L2  | -3.02 | -1.36 | 0.23  | 9.36E-06 | 0.0002 | methyl-CpG binding domain protein 3-like 5; methyl-CpG binding domain protein 3-like 2      |
| MBD3L5; MBD3L2  | -3.02 | -1.36 | 0.23  | 1.27E-05 | 0.0002 | methyl-CpG binding domain protein 3-like 5; methyl-CpG binding domain protein 3-like 2      |
| MBL2            | 3.25  | 0.32  | -1.38 | 4.50E-06 | 0.0002 | mannose-binding lectin (protein C) 2, soluble                                               |
| MC1R            | 3.3   | 0.28  | -1.44 | 3.91E-05 | 0.0003 | melanocortin 1 receptor (alpha melanocyte stimulating hormone receptor)                     |
| MC3R            | 3.3   | 0.32  | -1.4  | 2.57E-06 | 0.0002 | melanocortin 3 receptor                                                                     |
| MC4R            | -3.37 | -1.35 | 0.4   | 0.0001   | 0.0006 | melanocortin 4 receptor                                                                     |
| MCAT            | 3.46  | 0.41  | -1.38 | 6.40E-06 | 0.0002 | malonyl-CoA-acyl carrier protein transacylase                                               |
| MCCD1           | -3.2  | -1.31 | 0.36  | 1.51E-05 | 0.0002 | mitochondrial coiled-coil domain 1                                                          |
| MCCD1           | -3.2  | -1.31 | 0.36  | 1.51E-05 | 0.0002 | mitochondrial coiled-coil domain 1                                                          |
| MCCD1           | -3.22 | -1.32 | 0.36  | 4.07E-05 | 0.0003 | mitochondrial coiled-coil domain 1                                                          |
| MCM3            | -3.06 | -1.31 | 0.3   | 6.11E-06 | 0.0002 | minichromosome maintenance complex component 3                                              |
| MCM4            | 3.37  | 0.32  | -1.43 | 2.31E-05 | 0.0002 | minichromosome maintenance complex component 4                                              |
| MCMBP           | -3.01 | -1.31 | 0.28  | 1.28E-05 | 0.0002 | minichromosome maintenance complex binding protein                                          |

|                   |       |       |       |          |        |                                                                             |
|-------------------|-------|-------|-------|----------|--------|-----------------------------------------------------------------------------|
| MED11             | -3.21 | -1.38 | 0.3   | 3.80E-05 | 0.0003 | mediator complex subunit 11                                                 |
| MED19             | -3.23 | -1.41 | 0.28  | 1.54E-05 | 0.0002 | mediator complex subunit 19                                                 |
| MEGF8             | -3.32 | -1.38 | 0.35  | 4.93E-05 | 0.0003 | multiple EGF-like-domains 8                                                 |
| METTL6            | -3.06 | -1.31 | 0.3   | 4.41E-05 | 0.0003 | methyltransferase like 6                                                    |
| MEX3B             | 3.41  | 0.32  | -1.44 | 3.34E-05 | 0.0003 | mex-3 RNA binding family member B                                           |
| MFSD14B           | -3.16 | -1.38 | 0.28  | 2.29E-05 | 0.0002 | major facilitator superfamily domain containing 14B                         |
| MFSD5             | 3.59  | 0.44  | -1.4  | 1.61E-05 | 0.0002 | major facilitator superfamily domain containing 5                           |
| MGAT1             | -3.15 | -1.33 | 0.32  | 5.81E-05 | 0.0004 | mannosyl (alpha-1,3-)-glycoprotein beta-1,2-N-acetylglucosaminyltransferase |
| MGAT3             | -3.01 | -1.31 | 0.28  | 0.0002   | 0.0008 | mannosyl (beta-1,4-)-glycoprotein beta-1,4-N-acetylglucosaminyltransferase  |
| MGAT4EP           | 3.43  | 0.4   | -1.38 | 1.80E-05 | 0.0002 | MGAT4 family, member E, pseudogene                                          |
| MGLL              | -3.15 | -1.31 | 0.34  | 1.37E-05 | 0.0002 | monoglyceride lipase                                                        |
| MICALL1           | 3.28  | 0.3   | -1.41 | 1.34E-05 | 0.0002 | MICAL-like 1                                                                |
| MIF               | 3.3   | 0.32  | -1.4  | 5.02E-05 | 0.0003 | macrophage migration inhibitory factor (glycosylation-inhibiting factor)    |
| MILR1             | -3.04 | -1.28 | 0.32  | 2.88E-05 | 0.0003 | mast cell immunoglobulin-like receptor 1                                    |
| MIR103A1          | -3.26 | -1.38 | 0.32  | 8.56E-05 | 0.0005 | microRNA 103a-1                                                             |
| MIR1-1            | -3.45 | -1.48 | 0.31  | 0.0001   | 0.0006 | microRNA 1-1                                                                |
| MIR125B1          | 3.3   | 0.52  | -1.2  | 4.53E-05 | 0.0003 | microRNA 125b-1                                                             |
| MIR125B2          | -3.01 | -1.31 | 0.28  | 2.80E-05 | 0.0003 | microRNA 125b-2                                                             |
| MIR135A2          | -3.01 | -1.31 | 0.28  | 5.26E-06 | 0.0002 | microRNA 135a-2                                                             |
| MIR141            | -3.26 | -1.38 | 0.32  | 0.0001   | 0.0007 | microRNA 141                                                                |
| MIR142            | 3.3   | 0.28  | -1.44 | 9.49E-06 | 0.0002 | microRNA 142                                                                |
| MIR145; CARMN     | -3.11 | -1.31 | 0.32  | 5.13E-06 | 0.0002 | microRNA 145; cardiac mesoderm enhancer-associated non-coding RNA           |
| MIR150            | -3.16 | -1.38 | 0.28  | 1.06E-05 | 0.0002 | microRNA 150                                                                |
| MIR154            | -3.02 | -1.36 | 0.23  | 6.32E-05 | 0.0004 | microRNA 154                                                                |
| 195; MIR497HG; MI | 3.53  | 0.39  | -1.43 | 5.11E-05 | 0.0004 | microRNA 195; mir-497-195 cluster host gene; microRNA 497                   |
| MIR196A2          | 3.09  | 0.43  | -1.2  | 2.26E-05 | 0.0002 | microRNA 196a-2                                                             |
| MIR200B           | -3.01 | -1.31 | 0.28  | 8.41E-05 | 0.0005 | microRNA 200b                                                               |
| MIR206            | -3.01 | -1.31 | 0.28  | 0.0002   | 0.0008 | microRNA 206                                                                |
| MIR224; GABRE     | -3.23 | -1.41 | 0.28  | 3.29E-05 | 0.0003 | microRNA 224; gamma-aminobutyric acid (GABA) A receptor, epsilon            |
| MIR23A            | 3.61  | 0.47  | -1.38 | 6.85E-06 | 0.0002 | microRNA 23a                                                                |
| MIR26A1           | -3.21 | -1.36 | 0.32  | 1.10E-05 | 0.0002 | microRNA 26a-1                                                              |
| MIR299            | -3.03 | -1.43 | 0.17  | 3.87E-05 | 0.0003 | microRNA 299                                                                |
| MIR339            | 3.2   | 0.39  | -1.29 | 5.68E-06 | 0.0002 | microRNA 339                                                                |
| MIR92A2           | 3.26  | 0.32  | -1.38 | 4.05E-06 | 0.0002 | microRNA 92a-2                                                              |
| MIR93             | -3.03 | -1.36 | 0.23  | 5.43E-05 | 0.0004 | microRNA 93                                                                 |
| MIR98             | -3.12 | -1.36 | 0.28  | 2.64E-05 | 0.0003 | microRNA 98                                                                 |
| MIS18A            | -3.15 | -1.33 | 0.32  | 0.0001   | 0.0007 | MIS18 kinetochore protein A                                                 |
| MIXL1             | 3.12  | 0.26  | -1.38 | 7.81E-06 | 0.0002 | Mix paired-like homeobox                                                    |

|              |       |       |       |          |        |                                                                                                       |
|--------------|-------|-------|-------|----------|--------|-------------------------------------------------------------------------------------------------------|
| MKRN9P       | -3.1  | -1.33 | 0.3   | 2.54E-05 | 0.0003 | makorin ring finger protein 9, pseudogene                                                             |
| MLLT11       | -3.2  | -1.31 | 0.37  | 2.03E-05 | 0.0002 | myeloid/lymphoid or mixed-lineage leukemia; translocated to, 11                                       |
| MMAB         | -3.01 | -1.28 | 0.31  | 1.17E-05 | 0.0002 | methylmalonic aciduria (cobalamin deficiency) cbIB type                                               |
| MMP1         | 3.26  | 0.28  | -1.43 | 4.38E-06 | 0.0002 | matrix metalloproteinase 1                                                                            |
| MMP15        | -3.01 | -1.31 | 0.28  | 2.76E-05 | 0.0003 | matrix metalloproteinase 15 (membrane-inserted)                                                       |
| MMP16        | -3.07 | -1.36 | 0.25  | 2.64E-05 | 0.0003 | matrix metalloproteinase 16 (membrane-inserted)                                                       |
| MNT          | 3.19  | 0.29  | -1.38 | 9.99E-06 | 0.0002 | MAX network transcriptional repressor                                                                 |
| MOB3C; MKNK1 | -3.01 | -1.28 | 0.31  | 2.81E-05 | 0.0003 | MOB kinase activator 3C; MAP kinase interacting serine/threonine kinase 1                             |
| MON1A        | 3.03  | 0.4   | -1.2  | 2.40E-05 | 0.0002 | MON1 secretory trafficking family member A                                                            |
| MORC4        | 3.06  | 0.32  | -1.29 | 1.62E-05 | 0.0002 | MORC family CW-type zinc finger 4                                                                     |
| MOV10        | -3.2  | -1.31 | 0.36  | 4.32E-05 | 0.0003 | Mov10 RISC complex RNA helicase                                                                       |
| MPC1L        | -3.01 | -1.31 | 0.28  | 6.87E-05 | 0.0004 | mitochondrial pyruvate carrier 1-like                                                                 |
| MPDU1        | 3.06  | 0.32  | -1.29 | 1.61E-05 | 0.0002 | mannose-P-dolichol utilization defect 1                                                               |
| MPND         | 3.26  | 0.32  | -1.38 | 1.13E-05 | 0.0002 | MPN domain containing                                                                                 |
| MPRIP        | -3.16 | -1.31 | 0.35  | 4.40E-05 | 0.0003 | myosin phosphatase Rho interacting protein                                                            |
| MRAP         | -3.01 | -1.31 | 0.28  | 5.26E-06 | 0.0002 | melanocortin 2 receptor accessory protein                                                             |
| MROH6        | -3.58 | -1.46 | 0.38  | 1.65E-05 | 0.0002 | maestro heat-like repeat family member 6                                                              |
| MRPL16       | 3.44  | 0.4   | -1.38 | 3.00E-06 | 0.0002 | mitochondrial ribosomal protein L16                                                                   |
| MRPL2        | -3.06 | -1.28 | 0.34  | 4.37E-06 | 0.0002 | mitochondrial ribosomal protein L2                                                                    |
| MRPL20       | 3.48  | 0.38  | -1.42 | 1.12E-05 | 0.0002 | mitochondrial ribosomal protein L20                                                                   |
| MRPL20       | 3.48  | 0.38  | -1.42 | 1.12E-05 | 0.0002 | mitochondrial ribosomal protein L20                                                                   |
| MRPL32       | -3.19 | -1.33 | 0.34  | 2.79E-05 | 0.0003 | mitochondrial ribosomal protein L32                                                                   |
| MRPL41       | -3.07 | -1.3  | 0.32  | 8.70E-06 | 0.0002 | mitochondrial ribosomal protein L41                                                                   |
| MRPL47       | 3.44  | 0.32  | -1.46 | 3.45E-06 | 0.0002 | mitochondrial ribosomal protein L47                                                                   |
| MRPL9        | -3.02 | -1.3  | 0.3   | 7.74E-05 | 0.0005 | mitochondrial ribosomal protein L9                                                                    |
| MRPS16       | -3.11 | -1.31 | 0.32  | 2.22E-05 | 0.0002 | mitochondrial ribosomal protein S16                                                                   |
| MRPS17; GBAS | 3.3   | 0.28  | -1.44 | 3.90E-06 | 0.0002 | mitochondrial ribosomal protein S17; glioblastoma amplified sequence                                  |
| MRPS27       | -3.08 | -1.31 | 0.31  | 3.90E-06 | 0.0002 | mitochondrial ribosomal protein S27                                                                   |
| MRPS34       | -3    | -1.31 | 0.28  | 1.70E-05 | 0.0002 | mitochondrial ribosomal protein S34                                                                   |
| MRPS7        | -3.11 | -1.28 | 0.36  | 1.99E-05 | 0.0002 | mitochondrial ribosomal protein S7                                                                    |
| MSANTD2      | 3.41  | 0.37  | -1.4  | 3.54E-05 | 0.0003 | Myb/SANT-like DNA-binding domain containing 2                                                         |
| MSRB3        | 3.48  | 0.4   | -1.4  | 4.82E-06 | 0.0002 | methionine sulfoxide reductase B3                                                                     |
| MSTO1        | -3.24 | -1.33 | 0.36  | 0.0001   | 0.0007 | misato 1, mitochondrial distribution and morphology regulator                                         |
| MSX2         | 3.11  | 0.17  | -1.47 | 1.32E-05 | 0.0002 | msh homeobox 2                                                                                        |
| MT1P3        | 3.56  | 0.43  | -1.4  | 2.47E-06 | 0.0002 | metallothionein 1 pseudogene 3                                                                        |
| MTHFD2       | 3.56  | 0.43  | -1.4  | 4.46E-05 | 0.0003 | methylenetetrahydrofolate dehydrogenase (NADP+ dependent) 2, methylenetetrahydrofolate cyclohydrolase |
| MTMR12       | -3.1  | -1.36 | 0.28  | 1.61E-05 | 0.0002 | myotubularin related protein 12                                                                       |
| MTMR9        | -3.04 | -1.28 | 0.32  | 1.15E-05 | 0.0002 | myotubularin related protein 9                                                                        |

|                |       |       |       |          |        |                                                                                   |
|----------------|-------|-------|-------|----------|--------|-----------------------------------------------------------------------------------|
| MTRF1L         | 3.26  | 0.32  | -1.38 | 4.97E-06 | 0.0002 | mitochondrial translational release factor 1-like                                 |
| MTSS1L         | 3.16  | 0.23  | -1.43 | 9.10E-05 | 0.0005 | metastasis suppressor 1-like                                                      |
| MUC19          | 3.14  | 0.36  | -1.29 | 4.08E-05 | 0.0003 | mucin 19, oligomeric                                                              |
| MUCL1          | 3.33  | 0.32  | -1.41 | 7.21E-06 | 0.0002 | mucin-like 1                                                                      |
| MUL1           | 3.24  | 0.31  | -1.38 | 7.96E-06 | 0.0002 | mitochondrial E3 ubiquitin protein ligase 1                                       |
| MVK            | 3.52  | 0.43  | -1.38 | 1.23E-05 | 0.0002 | mevalonate kinase                                                                 |
| MXRA8          | 3.7   | 0.42  | -1.47 | 0.0001   | 0.0007 | matrix-remodelling associated 8                                                   |
| MYBL2          | 3.21  | 0.3   | -1.38 | 1.96E-05 | 0.0002 | v-myb avian myeloblastosis viral oncogene homolog-like 2                          |
| MYCN           | -3.11 | -1.31 | 0.32  | 1.05E-05 | 0.0002 | v-myc avian myelocytomatosis viral oncogene neuroblastoma derived homolog         |
| MYD88          | -3.2  | -1.35 | 0.33  | 3.71E-05 | 0.0003 | myeloid differentiation primary response 88                                       |
| MYO19          | -3.17 | -1.36 | 0.3   | 1.13E-05 | 0.0002 | myosin XIX                                                                        |
| MYOG           | 3.43  | 0.38  | -1.4  | 8.42E-06 | 0.0002 | myogenin (myogenic factor 4)                                                      |
| MYOM1          | -3.17 | -1.36 | 0.3   | 1.08E-05 | 0.0002 | myomesin 1                                                                        |
| MZF1           | 3.54  | 0.42  | -1.4  | 6.98E-06 | 0.0002 | myeloid zinc finger 1                                                             |
| NAA11          | -3.05 | -1.36 | 0.24  | 1.14E-05 | 0.0002 | N(alpha)-acetyltransferase 11, NatA catalytic subunit                             |
| NAA40          | -3.01 | -1.37 | 0.22  | 7.27E-05 | 0.0004 | N(alpha)-acetyltransferase 40, NatD catalytic subunit                             |
| NAALADL2       | -3.35 | -1.42 | 0.32  | 4.79E-05 | 0.0003 | N-acetylated alpha-linked acidic dipeptidase-like 2                               |
| NABP2          | -3.42 | -1.41 | 0.36  | 0.0003   | 0.0013 | nucleic acid binding protein 2                                                    |
| NACC1          | 3.35  | 0.33  | -1.41 | 3.58E-05 | 0.0003 | nucleus accumbens associated 1, BEN and BTB (POZ) domain containing               |
| NANOG; NANOGP1 | 3.29  | 0.28  | -1.44 | 3.13E-06 | 0.0002 | Nanog homeobox; Nanog homeobox pseudogene 8                                       |
| NANOGP1        | -3.12 | -1.36 | 0.28  | 8.37E-06 | 0.0002 | Nanog homeobox pseudogene 1                                                       |
| NANS           | -3.12 | -1.36 | 0.28  | 8.37E-06 | 0.0002 | N-acetylneuraminic acid synthase                                                  |
| NARFL          | 3.16  | 0.28  | -1.38 | 1.10E-05 | 0.0002 | nuclear prelamin A recognition factor-like                                        |
| NBEA           | 3.37  | 0.32  | -1.43 | 1.98E-05 | 0.0002 | neurobeachin                                                                      |
| NBPF7          | -3.06 | -1.33 | 0.28  | 1.11E-05 | 0.0002 | neuroblastoma breakpoint family, member 7                                         |
| NBR1           | 3.21  | 0.39  | -1.29 | 5.76E-06 | 0.0002 | neighbor of BRCA1 gene 1                                                          |
| NBR2           | -3.01 | -1.31 | 0.28  | 1.21E-05 | 0.0002 | neighbor of BRCA1 gene 2 (non-protein coding)                                     |
| NCBP3          | -3.22 | -1.28 | 0.4   | 1.13E-05 | 0.0002 | nuclear cap binding subunit 3                                                     |
| NCKAP5         | 3.47  | 0.32  | -1.47 | 3.49E-05 | 0.0003 | NCK-associated protein 5                                                          |
| NCLN           | 3.24  | 0.3   | -1.4  | 9.42E-06 | 0.0002 | nicalin                                                                           |
| NCR3LG1        | -3.16 | -1.31 | 0.35  | 1.50E-05 | 0.0002 | natural killer cell cytotoxicity receptor 3 ligand 1                              |
| NDNF           | -3.06 | -1.31 | 0.3   | 3.89E-05 | 0.0003 | neuron-derived neurotrophic factor                                                |
| NDOR1          | -3.14 | -1.31 | 0.34  | 0.0002   | 0.0008 | NADPH dependent diflavin oxidoreductase 1                                         |
| NDUFA4L2       | 3.49  | 0.38  | -1.43 | 3.29E-06 | 0.0002 | NADH dehydrogenase (ubiquinone) 1 alpha subcomplex, 4-like 2                      |
| NDUFA8         | -3.01 | -1.31 | 0.28  | 8.25E-06 | 0.0002 | NADH dehydrogenase (ubiquinone) 1 alpha subcomplex, 8, 19kDa                      |
| NDUFAF2        | 3.1   | 0.43  | -1.2  | 9.81E-05 | 0.0005 | NADH dehydrogenase (ubiquinone) complex I, assembly factor 2                      |
| NDUFS2         | -3.12 | -1.36 | 0.28  | 8.13E-05 | 0.0005 | NADH dehydrogenase (ubiquinone) Fe-S protein 2, 49kDa (NADH-coenzyme Q reductase) |
| NEIL2          | 3.58  | 0.46  | -1.38 | 1.40E-05 | 0.0002 | nei-like DNA glycosylase 2                                                        |

|                |       |       |       |          |        |                                                                          |
|----------------|-------|-------|-------|----------|--------|--------------------------------------------------------------------------|
| NEURL2         | 3.32  | 0.3   | -1.43 | 8.70E-06 | 0.0002 | neuralized E3 ubiquitin protein ligase 2                                 |
| NEURL3         | -3.01 | -1.36 | 0.23  | 1.45E-05 | 0.0002 | neuralized E3 ubiquitin protein ligase 3                                 |
| NEURL4; GPS2   | 3.21  | 0.3   | -1.38 | 1.19E-05 | 0.0002 | neuralized E3 ubiquitin protein ligase 4; G protein pathway suppressor 2 |
| NEUROD4        | -3.19 | -1.32 | 0.35  | 1.30E-05 | 0.0002 | neuronal differentiation 4                                               |
| NFE2           | 3.37  | 0.32  | -1.43 | 6.73E-06 | 0.0002 | nuclear factor, erythroid 2                                              |
| NGRN           | 3.61  | 0.45  | -1.4  | 2.41E-06 | 0.0002 | neugrin, neurite outgrowth associated                                    |
| NIPSNA1; THOC5 | 3.16  | 0.28  | -1.38 | 4.87E-06 | 0.0002 | nipsnap homolog 1 (C. elegans); THO complex 5                            |
| NIPSNA3A       | -3.23 | -1.41 | 0.28  | 8.28E-05 | 0.0005 | nipsnap homolog 3A (C. elegans)                                          |
| NIPSNA3B       | 3.53  | 0.39  | -1.43 | 7.05E-06 | 0.0002 | nipsnap homolog 3B (C. elegans)                                          |
| NIT1           | 3.26  | 0.41  | -1.29 | 4.89E-05 | 0.0003 | nitrilase 1                                                              |
| NKTR           | 3.63  | 0.43  | -1.43 | 4.75E-06 | 0.0002 | natural killer cell triggering receptor                                  |
| NKX2-2         | -3.04 | -1.35 | 0.26  | 8.83E-06 | 0.0002 | NK2 homeobox 2                                                           |
| NKX3-1         | -3.12 | -1.36 | 0.28  | 3.66E-05 | 0.0003 | NK3 homeobox 1                                                           |
| NLRP4          | 3.02  | 0.39  | -1.2  | 4.41E-06 | 0.0002 | NLR family, pyrin domain containing 4                                    |
| NLRX1          | 3.14  | 0.36  | -1.29 | 7.64E-06 | 0.0002 | NLR family member X1                                                     |
| NMB            | -3.01 | -1.31 | 0.28  | 1.97E-05 | 0.0002 | neuromedin B                                                             |
| NME4           | -3.28 | -1.31 | 0.41  | 2.26E-05 | 0.0002 | NME/NM23 nucleoside diphosphate kinase 4                                 |
| NOB1           | -3    | -1.32 | 0.26  | 2.31E-05 | 0.0002 | NIN1/RPN12 binding protein 1 homolog                                     |
| NOG            | -3.06 | -1.34 | 0.27  | 9.27E-06 | 0.0002 | noggin                                                                   |
| NOP10          | -3.23 | -1.35 | 0.34  | 5.09E-05 | 0.0003 | NOP10 ribonucleoprotein                                                  |
| NOP16          | -3.08 | -1.31 | 0.31  | 1.27E-05 | 0.0002 | NOP16 nucleolar protein                                                  |
| NOV            | -3.04 | -1.32 | 0.28  | 1.11E-05 | 0.0002 | nephroblastoma overexpressed                                             |
| NOVA2          | 3.01  | 0.14  | -1.44 | 4.20E-06 | 0.0002 | neuro-oncological ventral antigen 2                                      |
| NOX4           | -3.01 | -1.31 | 0.28  | 4.11E-05 | 0.0003 | NADPH oxidase 4                                                          |
| NOXA1          | -3.01 | -1.31 | 0.28  | 6.59E-06 | 0.0002 | NADPH oxidase activator 1                                                |
| NPAT           | -3.16 | -1.38 | 0.28  | 0.0001   | 0.0006 | nuclear protein, ataxia-telangiectasia locus                             |
| NPM2           | -3.37 | -1.48 | 0.28  | 2.74E-05 | 0.0003 | nucleophosmin/nucleoplasmin 2                                            |
| NPSR1          | -3.21 | -1.3  | 0.39  | 2.62E-05 | 0.0003 | neuropeptide S receptor 1                                                |
| NPSR1-AS1      | 3.01  | 0.3   | -1.29 | 9.90E-06 | 0.0002 | NPSR1 antisense RNA 1                                                    |
| NPTN           | -3.21 | -1.37 | 0.31  | 4.20E-05 | 0.0003 | neuroplastin                                                             |
| NPY1R          | -3.06 | -1.3  | 0.32  | 1.74E-05 | 0.0002 | neuropeptide Y receptor Y1                                               |
| NQO1           | -3.17 | -1.34 | 0.33  | 0.0002   | 0.0011 | NAD(P)H dehydrogenase, quinone 1                                         |
| NR2E1          | 3.08  | 0.31  | -1.31 | 1.53E-05 | 0.0002 | nuclear receptor subfamily 2, group E, member 1                          |
| NR2F1          | -3.1  | -1.3  | 0.34  | 3.15E-05 | 0.0003 | nuclear receptor subfamily 2, group F, member 1                          |
| NR5A1          | 3.16  | 0.34  | -1.31 | 1.39E-05 | 0.0002 | nuclear receptor subfamily 5, group A, member 1                          |
| NRARP          | 3.25  | 0.32  | -1.38 | 1.00E-05 | 0.0002 | NOTCH-regulated ankyrin repeat protein                                   |
| NRSN1          | -3.01 | -1.3  | 0.29  | 9.47E-06 | 0.0002 | neurensin 1                                                              |
| NRSN2          | 3.15  | 0.18  | -1.47 | 9.98E-06 | 0.0002 | neurensin 2                                                              |

|              |       |       |       |          |        |                                                                                                          |
|--------------|-------|-------|-------|----------|--------|----------------------------------------------------------------------------------------------------------|
| NSMCE1       | -3.03 | -1.32 | 0.28  | 0.0002   | 0.0008 | NSE1 homolog, SMC5-SMC6 complex component                                                                |
| NSUN7        | -3.12 | -1.36 | 0.28  | 3.53E-06 | 0.0002 | NOP2/Sun domain family, member 7                                                                         |
| NT5M         | -3.14 | -1.31 | 0.34  | 1.83E-05 | 0.0002 | 5,3-nucleotidase, mitochondrial                                                                          |
| NUDT11       | -3.12 | -1.36 | 0.28  | 8.72E-05 | 0.0005 | nudix hydrolase 11                                                                                       |
| NUDT9        | 3.22  | 0.31  | -1.38 | 9.55E-06 | 0.0002 | nudix hydrolase 9                                                                                        |
| NUMBL        | 3.06  | 0.41  | -1.2  | 1.08E-05 | 0.0002 | numb homolog (Drosophila)-like                                                                           |
| NUP54        | 3.16  | 0.28  | -1.38 | 1.03E-05 | 0.0002 | nucleoporin 54kDa                                                                                        |
| NUPR2        | -3.02 | -1.31 | 0.29  | 1.96E-05 | 0.0002 | nuclear protein 2, transcriptional regulator                                                             |
| NWD1         | 3.41  | 0.39  | -1.38 | 2.33E-06 | 0.0002 | NACHT and WD repeat domain containing 1                                                                  |
| NXPE1        | 3.2   | 0.39  | -1.29 | 5.70E-06 | 0.0002 | neurexophilin and PC-esterase domain family, member 1                                                    |
| NXPE4        | 3.26  | 0.32  | -1.38 | 9.34E-06 | 0.0002 | neurexophilin and PC-esterase domain family, member 4                                                    |
| OAZ1; SPPL2B | 3.3   | 0.28  | -1.44 | 7.62E-06 | 0.0002 | ornithine decarboxylase antizyme 1; signal peptide peptidase like 2B                                     |
| OBP2A        | -3.53 | -1.38 | 0.44  | 1.20E-05 | 0.0002 | odorant binding protein 2A                                                                               |
| OCEL1        | -3.05 | -1.36 | 0.25  | 3.92E-05 | 0.0003 | occludin/ELL domain containing 1                                                                         |
| OCIAD1       | 3.37  | 0.32  | -1.43 | 6.59E-06 | 0.0002 | OCIA domain containing 1                                                                                 |
| OGDHL        | 3.02  | 0.39  | -1.2  | 1.95E-05 | 0.0002 | oxoglutarate dehydrogenase-like                                                                          |
| OLFM4        | -3    | -1.37 | 0.21  | 1.58E-05 | 0.0002 | olfactomedin 4                                                                                           |
| OLFML2B      | 3.17  | 0.28  | -1.39 | 4.83E-05 | 0.0003 | olfactomedin like 2B                                                                                     |
| OPALIN       | -3.06 | -1.33 | 0.28  | 7.01E-06 | 0.0002 | oligodendrocytic myelin paranodal and inner loop protein                                                 |
| OPN1SW       | -3.31 | -1.36 | 0.36  | 3.26E-06 | 0.0002 | opsin 1 (cone pigments), short-wave-sensitive                                                            |
| OR10A2       | 3.37  | 0.32  | -1.43 | 3.98E-06 | 0.0002 | olfactory receptor, family 10, subfamily A, member 2                                                     |
| OR10G4       | -3.41 | -1.47 | 0.3   | 8.64E-05 | 0.0005 | olfactory receptor, family 10, subfamily G, member 4                                                     |
| OR10G8       | -3.16 | -1.38 | 0.28  | 3.36E-05 | 0.0003 | olfactory receptor, family 10, subfamily G, member 8                                                     |
| OR13A1       | -3.05 | -1.3  | 0.31  | 1.81E-05 | 0.0002 | olfactory receptor, family 13, subfamily A, member 1                                                     |
| OR13C4       | 3.37  | 0.32  | -1.43 | 0.0001   | 0.0007 | olfactory receptor, family 13, subfamily C, member 4                                                     |
| OR13C5       | -3.33 | -1.46 | 0.28  | 0.0002   | 0.0010 | olfactory receptor, family 13, subfamily C, member 5                                                     |
| OR13C8       | -3.06 | -1.33 | 0.28  | 1.04E-05 | 0.0002 | olfactory receptor, family 13, subfamily C, member 8                                                     |
| OR13C9       | -3.29 | -1.35 | 0.37  | 2.48E-05 | 0.0002 | olfactory receptor, family 13, subfamily C, member 9                                                     |
| OR1E3        | -3.03 | -1.32 | 0.28  | 9.01E-05 | 0.0005 | olfactory receptor, family 1, subfamily E, member 3 (gene/pseudogene)                                    |
| OR1L4        | 3.26  | 0.32  | -1.38 | 0.0002   | 0.0008 | olfactory receptor, family 1, subfamily L, member 4                                                      |
| OR2A14       | -3.12 | -1.3  | 0.34  | 0.0002   | 0.0008 | olfactory receptor, family 2, subfamily A, member 14                                                     |
| OR2B11       | -3.16 | -1.38 | 0.28  | 1.09E-05 | 0.0002 | olfactory receptor, family 2, subfamily B, member 11                                                     |
| OR2B7P       | -3.05 | -1.38 | 0.23  | 1.40E-05 | 0.0002 | olfactory receptor, family 2, subfamily B, member 7 pseudogene                                           |
| OR2B8P       | -3.01 | -1.31 | 0.28  | 6.48E-05 | 0.0004 | olfactory receptor, family 2, subfamily B, member 8 pseudogene                                           |
| OR2D3        | -3.06 | -1.33 | 0.28  | 3.99E-06 | 0.0002 | olfactory receptor, family 2, subfamily D, member 3                                                      |
| OR2G3        | -3.04 | -1.38 | 0.22  | 0.0002   | 0.0009 | olfactory receptor, family 2, subfamily G, member 3                                                      |
| OR2H2; OR2H1 | -3.16 | -1.38 | 0.28  | 0.0002   | 0.0010 | olfactory receptor, family 2, subfamily H, member 2; olfactory receptor, family 2, subfamily H, member 1 |
| OR2T11       | -3.36 | -1.38 | 0.36  | 0.0001   | 0.0006 | olfactory receptor, family 2, subfamily T, member 11 (gene/pseudogene)                                   |

|                  |       |       |       |          |        |                                                                                                                                   |
|------------------|-------|-------|-------|----------|--------|-----------------------------------------------------------------------------------------------------------------------------------|
| OR2T2            | -3.06 | -1.33 | 0.28  | 2.56E-05 | 0.0003 | olfactory receptor, family 2, subfamily T, member 2                                                                               |
| OR2T35; OR2T2    | -3.06 | -1.33 | 0.28  | 2.56E-05 | 0.0003 | olfactory receptor, family 2, subfamily T, member 35; olfactory receptor, family 2, subfamily T, member 2                         |
| OR2W1            | -3.16 | -1.38 | 0.28  | 4.09E-05 | 0.0003 | olfactory receptor, family 2, subfamily W, member 1                                                                               |
| OR2W1            | -3.16 | -1.38 | 0.28  | 4.09E-05 | 0.0003 | olfactory receptor, family 2, subfamily W, member 1                                                                               |
| OR2W1            | -3.16 | -1.38 | 0.28  | 4.09E-05 | 0.0003 | olfactory receptor, family 2, subfamily W, member 1                                                                               |
| OR4A21P          | -3.12 | -1.36 | 0.28  | 7.16E-05 | 0.0004 | olfactory receptor, family 4, subfamily A, member 21 pseudogene                                                                   |
| OR4B1            | -3.12 | -1.36 | 0.28  | 0.0002   | 0.0008 | olfactory receptor, family 4, subfamily B, member 1                                                                               |
| OR4D10           | -3.12 | -1.31 | 0.33  | 6.49E-05 | 0.0004 | olfactory receptor, family 4, subfamily D, member 10                                                                              |
| OR4D5            | 3.42  | 0.39  | -1.38 | 1.88E-05 | 0.0002 | olfactory receptor, family 4, subfamily D, member 5                                                                               |
| OR51A8P          | -3.1  | -1.36 | 0.27  | 1.78E-05 | 0.0002 | olfactory receptor, family 51, subfamily A, member 8 pseudogene                                                                   |
| OR51J1           | -3.26 | -1.38 | 0.32  | 0.0001   | 0.0006 | olfactory receptor, family 51, subfamily J, member 1 (gene/pseudogene)                                                            |
| OR52B3P          | -3.34 | -1.36 | 0.38  | 1.40E-05 | 0.0002 | olfactory receptor, family 52, subfamily B, member 3 pseudogene                                                                   |
| OR52B4           | -3.06 | -1.3  | 0.32  | 1.81E-05 | 0.0002 | olfactory receptor, family 52, subfamily B, member 4 (gene/pseudogene)                                                            |
| OR52D1           | -3.06 | -1.33 | 0.28  | 6.13E-06 | 0.0002 | olfactory receptor, family 52, subfamily D, member 1                                                                              |
| OR52E4           | -3.26 | -1.38 | 0.32  | 0.0002   | 0.0011 | olfactory receptor, family 52, subfamily E, member 4                                                                              |
| OR52K1           | -3.12 | -1.31 | 0.33  | 0.0002   | 0.0008 | olfactory receptor, family 52, subfamily K, member 1                                                                              |
| OR52Z1           | 3.08  | 0.22  | -1.4  | 1.60E-05 | 0.0002 | olfactory receptor, family 52, subfamily Z, member 1 (gene/pseudogene)                                                            |
| OR56A3           | -3.12 | -1.38 | 0.26  | 2.63E-05 | 0.0003 | olfactory receptor, family 56, subfamily A, member 3                                                                              |
| OR5BB1P          | 3.26  | 0.32  | -1.38 | 1.05E-05 | 0.0002 | olfactory receptor, family 5, subfamily BB, member 1 pseudogene                                                                   |
| OR5E1P           | 3.37  | 0.32  | -1.43 | 1.97E-05 | 0.0002 | olfactory receptor, family 5, subfamily E, member 1 pseudogene                                                                    |
| OR5K3            | -3.31 | -1.36 | 0.36  | 4.71E-05 | 0.0003 | olfactory receptor, family 5, subfamily K, member 3                                                                               |
| OR5R1            | 3.26  | 0.32  | -1.38 | 9.34E-06 | 0.0002 | olfactory receptor, family 5, subfamily R, member 1 (gene/pseudogene)                                                             |
| OR6K6            | -3.01 | -1.31 | 0.28  | 2.91E-05 | 0.0003 | olfactory receptor, family 6, subfamily K, member 6                                                                               |
| OR6P1            | 3.16  | 0.23  | -1.43 | 4.46E-06 | 0.0002 | olfactory receptor, family 6, subfamily P, member 1                                                                               |
| OR7D4            | -3.1  | -1.36 | 0.27  | 4.77E-05 | 0.0003 | olfactory receptor, family 7, subfamily D, member 4                                                                               |
| OR7E14P; OR7E145 | 3.16  | 0.23  | -1.43 | 4.46E-06 | 0.0002 | olfactory receptor, family 7, subfamily E, member 14 pseudogene; olfactory receptor, family 7, subfamily E, member 145 pseudogene |
| OR7E162P         | -3.15 | -1.32 | 0.33  | 3.27E-05 | 0.0003 | olfactory receptor, family 7, subfamily E, member 162 pseudogene                                                                  |
| OR7G1            | -3.28 | -1.46 | 0.25  | 3.82E-05 | 0.0003 | olfactory receptor, family 7, subfamily G, member 1                                                                               |
| OR8A1            | 3.04  | 0.14  | -1.47 | 1.24E-05 | 0.0002 | olfactory receptor, family 8, subfamily A, member 1                                                                               |
| OR8B8            | 3.4   | 0.38  | -1.38 | 5.12E-06 | 0.0002 | olfactory receptor, family 8, subfamily B, member 8                                                                               |
| OR8K1            | -3.24 | -1.33 | 0.36  | 1.93E-05 | 0.0002 | olfactory receptor, family 8, subfamily K, member 1                                                                               |
| OR8K3            | -3.41 | -1.36 | 0.4   | 7.37E-06 | 0.0002 | olfactory receptor, family 8, subfamily K, member 3 (gene/pseudogene)                                                             |
| ORC1             | 3.26  | 0.32  | -1.38 | 9.64E-05 | 0.0005 | origin recognition complex subunit 1                                                                                              |
| OTOP2            | 3.2   | 0.23  | -1.44 | 7.19E-06 | 0.0002 | otopetrin 2                                                                                                                       |
| OTUD3            | 3.01  | 0.39  | -1.2  | 8.10E-05 | 0.0005 | OTU deubiquitinase 3                                                                                                              |
| OVOL1            | 3.09  | 0.23  | -1.4  | 1.09E-05 | 0.0002 | ovo-like zinc finger 1                                                                                                            |
| OXCT2P1; OXCT2   | 3.46  | 0.41  | -1.38 | 3.36E-06 | 0.0002 | 3-oxoacid CoA-transferase 2 pseudogene 1; 3-oxoacid CoA-transferase 2                                                             |
| OXCT2P1; OXCT2   | 3.46  | 0.41  | -1.38 | 3.36E-06 | 0.0002 | 3-oxoacid CoA-transferase 2 pseudogene 1; 3-oxoacid CoA-transferase 2                                                             |



|                 |       |       |       |          |        |                                                                              |
|-----------------|-------|-------|-------|----------|--------|------------------------------------------------------------------------------|
| P3H1            | 3.2   | 0.28  | -1.4  | 3.27E-05 | 0.0003 | prolyl 3-hydroxylase 1                                                       |
| PABPC3          | -3.04 | -1.28 | 0.32  | 2.50E-05 | 0.0002 | poly(A) binding protein, cytoplasmic 3                                       |
| PACSIN2         | 3.07  | 0.24  | -1.38 | 9.02E-06 | 0.0002 | protein kinase C and casein kinase substrate in neurons 2                    |
| PAEP            | 3.37  | 0.32  | -1.43 | 8.46E-06 | 0.0002 | progesterone-associated endometrial protein                                  |
| PAF1            | -3.12 | -1.36 | 0.28  | 2.52E-05 | 0.0003 | PAF1 homolog, Paf1/RNA polymerase II complex component                       |
| PAFAH1B2        | 3.03  | 0.3   | -1.3  | 2.39E-05 | 0.0002 | platelet-activating factor acetylhydrolase 1b, catalytic subunit 2 (30kDa)   |
| PAG1            | -3.07 | -1.34 | 0.28  | 1.18E-05 | 0.0002 | phosphoprotein membrane anchor with glycosphingolipid microdomains 1         |
| PAIP1           | 3.37  | 0.32  | -1.43 | 3.11E-06 | 0.0002 | poly(A) binding protein interacting protein 1                                |
| PAK3            | -3.16 | -1.38 | 0.28  | 0.0002   | 0.0007 | p21 protein (Cdc42/Rac)-activated kinase 3                                   |
| PALLD           | 3.16  | 0.28  | -1.38 | 2.96E-06 | 0.0002 | palladin, cytoskeletal associated protein                                    |
| PAMR1           | -3.32 | -1.41 | 0.32  | 2.89E-05 | 0.0003 | peptidase domain containing associated with muscle regeneration 1            |
| PAN2; CNPY2     | 3.26  | 0.32  | -1.38 | 2.75E-05 | 0.0003 | PAN2 poly(A) specific ribonuclease subunit; canopy FGF signaling regulator 2 |
| PAPD7           | 3.37  | 0.32  | -1.43 | 3.00E-06 | 0.0002 | PAP associated domain containing 7                                           |
| PAQR5           | 3.08  | 0.19  | -1.44 | 3.21E-06 | 0.0002 | progesterone and adipoQ receptor family member V                             |
| PAQR9           | -3.25 | -1.31 | 0.39  | 5.13E-06 | 0.0002 | progesterone and adipoQ receptor family member IX                            |
| PARP2           | 3.37  | 0.32  | -1.43 | 3.73E-05 | 0.0003 | poly(ADP-ribose) polymerase 2                                                |
| PAX6            | 3.74  | 0.43  | -1.47 | 3.10E-05 | 0.0003 | paired box 6                                                                 |
| PCDH17          | -3    | -1.33 | 0.25  | 2.50E-05 | 0.0002 | protocadherin 17                                                             |
| PCDHB11         | 3.44  | 0.32  | -1.46 | 2.69E-05 | 0.0003 | protocadherin beta 11                                                        |
| PCDHB3          | 3.47  | 0.32  | -1.47 | 0.0002   | 0.0008 | protocadherin beta 3                                                         |
| PCED1A          | 3.26  | 0.32  | -1.38 | 9.94E-06 | 0.0002 | PC-esterase domain containing 1A                                             |
| PCGF7P          | -3.16 | -1.38 | 0.28  | 5.64E-05 | 0.0004 | polycomb group ring finger 7 pseudogene                                      |
| PCNP            | -3.29 | -1.4  | 0.32  | 1.48E-05 | 0.0002 | PEST proteolytic signal containing nuclear protein                           |
| PCNXL3          | -3.12 | -1.36 | 0.28  | 0.0001   | 0.0006 | pecanex-like 3 (Drosophila)                                                  |
| PDCD2L          | 3.39  | 0.32  | -1.44 | 3.30E-06 | 0.0002 | programmed cell death 2-like                                                 |
| PDCD7           | -3.03 | -1.3  | 0.3   | 0.0001   | 0.0006 | programmed cell death 7                                                      |
| PDCL            | -3.16 | -1.38 | 0.28  | 3.20E-05 | 0.0003 | phosducin like                                                               |
| PDDC1           | 3.55  | 0.41  | -1.41 | 5.40E-05 | 0.0004 | Parkinson disease 7 domain containing 1                                      |
| PDE1C           | -3.06 | -1.33 | 0.28  | 1.80E-05 | 0.0002 | phosphodiesterase 1C, calmodulin-dependent 70kDa                             |
| PDE2A           | 3.26  | 0.32  | -1.38 | 2.68E-06 | 0.0002 | phosphodiesterase 2A, cGMP-stimulated                                        |
| PDE4DIP; PFN1P2 | 3.26  | 0.32  | -1.38 | 9.94E-06 | 0.0002 | phosphodiesterase 4D interacting protein; profilin 1 pseudogene 2            |
| PDGFRL          | -3.35 | -1.43 | 0.31  | 8.10E-06 | 0.0002 | platelet-derived growth factor receptor-like                                 |
| PDHX            | -3.08 | -1.38 | 0.24  | 2.77E-05 | 0.0003 | pyruvate dehydrogenase complex, component X                                  |
| PDLIM5          | -3.26 | -1.38 | 0.32  | 2.29E-05 | 0.0002 | PDZ and LIM domain 5                                                         |
| PEBP1           | 3.67  | 0.43  | -1.44 | 6.03E-05 | 0.0004 | phosphatidylethanolamine binding protein 1                                   |
| PEX11A          | -3.17 | -1.36 | 0.3   | 9.64E-06 | 0.0002 | peroxisomal biogenesis factor 11 alpha                                       |
| PEX14           | -3.21 | -1.3  | 0.38  | 1.00E-05 | 0.0002 | peroxisomal biogenesis factor 14                                             |
| PEX19           | -3.04 | -1.28 | 0.32  | 2.05E-05 | 0.0002 | peroxisomal biogenesis factor 19                                             |

|                   |       |       |       |          |        |                                                                                                                                                                                                                                                                                                                            |
|-------------------|-------|-------|-------|----------|--------|----------------------------------------------------------------------------------------------------------------------------------------------------------------------------------------------------------------------------------------------------------------------------------------------------------------------------|
| PFKFB4            | -3.16 | -1.38 | 0.28  | 4.84E-06 | 0.0002 | 6-phosphofructo-2-kinase/fructose-2,6-biphosphatase 4                                                                                                                                                                                                                                                                      |
| PFKM              | -3.16 | -1.31 | 0.35  | 0.0001   | 0.0006 | phosphofructokinase, muscle                                                                                                                                                                                                                                                                                                |
| PGAM2             | -3.03 | -1.3  | 0.3   | 2.92E-05 | 0.0003 | phosphoglycerate mutase 2 (muscle)                                                                                                                                                                                                                                                                                         |
| PGPEP1L           | 3.28  | 0.32  | -1.39 | 4.87E-05 | 0.0003 | pyroglutamyl-peptidase I-like                                                                                                                                                                                                                                                                                              |
| PHF2              | -3.03 | -1.38 | 0.22  | 2.03E-05 | 0.0002 | PHD finger protein 2                                                                                                                                                                                                                                                                                                       |
| PHLDA1            | -3.04 | -1.35 | 0.26  | 0.0001   | 0.0006 | pleckstrin homology-like domain, family A, member 1                                                                                                                                                                                                                                                                        |
| PHLPP1            | -3.01 | -1.31 | 0.28  | 1.62E-05 | 0.0002 | PH domain and leucine rich repeat protein phosphatase 1                                                                                                                                                                                                                                                                    |
| PHOSPHO1          | -3.06 | -1.33 | 0.28  | 9.34E-05 | 0.0005 | phosphatase, orphan 1                                                                                                                                                                                                                                                                                                      |
| PHOX2A            | 3.26  | 0.32  | -1.38 | 8.28E-06 | 0.0002 | paired-like homeobox 2a                                                                                                                                                                                                                                                                                                    |
| PHYH              | 3.39  | 0.35  | -1.41 | 1.88E-05 | 0.0002 | phytanoyl-CoA 2-hydroxylase                                                                                                                                                                                                                                                                                                |
| PI4KAP1           | -3.24 | -1.33 | 0.36  | 5.03E-05 | 0.0003 | phosphatidylinositol 4-kinase, catalytic, alpha pseudogene 1                                                                                                                                                                                                                                                               |
| PI4KAP1; PI4KAP2  | -3.04 | -1.28 | 0.32  | 1.28E-05 | 0.0002 | phosphatidylinositol 4-kinase, catalytic, alpha pseudogene 1; phosphatidylinositol 4-kinase, catalytic, alpha pseudogene 2                                                                                                                                                                                                 |
| PIAS4             | -3.03 | -1.3  | 0.31  | 5.06E-05 | 0.0003 | protein inhibitor of activated STAT 4                                                                                                                                                                                                                                                                                      |
| PIGV              | 3.06  | 0.41  | -1.2  | 3.98E-06 | 0.0002 | phosphatidylinositol glycan anchor biosynthesis class V                                                                                                                                                                                                                                                                    |
| PIK3CB            | 3.2   | 0.3   | -1.38 | 1.12E-05 | 0.0002 | phosphatidylinositol-4,5-bisphosphate 3-kinase, catalytic subunit beta                                                                                                                                                                                                                                                     |
| PIG2P-PILRB; STAG | 3.05  | 0.32  | -1.29 | 3.70E-06 | 0.0002 | paired immunoglobulin-like type 2 receptor beta; STAG3LSP-PIG2P-PILRB readthrough; stromal antigen 3-like 5 pseudogene; poliovirus receptor related immunoglobulin domain containing 2, pseudogene; paired immunoglobulin-like type 2 receptor alpha                                                                       |
| PINX1             | 3.2   | 0.25  | -1.43 | 3.42E-06 | 0.0002 | PIN2/TERF1 interacting, telomerase inhibitor 1                                                                                                                                                                                                                                                                             |
| PIP5K1A           | -3.13 | -1.28 | 0.36  | 0.0002   | 0.0008 | phosphatidylinositol-4-phosphate 5-kinase, type I, alpha                                                                                                                                                                                                                                                                   |
| PIP5KL1           | -3.18 | -1.28 | 0.39  | 0.0002   | 0.0010 | phosphatidylinositol-4-phosphate 5-kinase-like 1                                                                                                                                                                                                                                                                           |
| PIR               | -3.26 | -1.38 | 0.32  | 8.66E-05 | 0.0005 | pirin                                                                                                                                                                                                                                                                                                                      |
| PKD1              | -3.2  | -1.31 | 0.36  | 0.0003   | 0.0011 | polycystic kidney disease 1 (autosomal dominant)                                                                                                                                                                                                                                                                           |
| PKDCC             | -3.04 | -1.28 | 0.32  | 1.32E-05 | 0.0002 | protein kinase domain containing, cytoplasmic                                                                                                                                                                                                                                                                              |
| PLA2G2E           | -3.09 | -1.35 | 0.28  | 1.33E-05 | 0.0002 | phospholipase A2, group IIE                                                                                                                                                                                                                                                                                                |
| PLA2G4D           | 3.53  | 0.39  | -1.43 | 1.21E-05 | 0.0002 | phospholipase A2, group IVD (cytosolic)                                                                                                                                                                                                                                                                                    |
| PLA2G7            | -3.01 | -1.31 | 0.28  | 4.44E-06 | 0.0002 | phospholipase A2, group VII (platelet-activating factor acetylhydrolase, plasma)                                                                                                                                                                                                                                           |
| PLBD1             | -3.16 | -1.36 | 0.3   | 0.0002   | 0.0009 | phospholipase B domain containing 1                                                                                                                                                                                                                                                                                        |
| PLEKHG4           | -3.14 | -1.33 | 0.32  | 4.57E-06 | 0.0002 | pleckstrin homology domain containing, family G (with RhoGef domain) member 4                                                                                                                                                                                                                                              |
| PLPPR5            | -3.09 | -1.35 | 0.28  | 1.64E-05 | 0.0002 | phospholipid phosphatase related 5                                                                                                                                                                                                                                                                                         |
| PLVAP             | -3.2  | -1.31 | 0.36  | 4.31E-06 | 0.0002 | plasmalemma vesicle associated protein                                                                                                                                                                                                                                                                                     |
| PMS2P7; PMS2P10   | -3.04 | -1.31 | 0.3   | 3.54E-05 | 0.0003 | PMS2 homolog 2, mismatch repair system component pseudogene 2; PMS2 homolog 2, mismatch repair system component pseudogene 7; PMS2 homolog 2, mismatch repair system component pseudogene 10; PMS2 homolog 2, mismatch repair system component pseudogene 6                                                                |
| 2P7; PMS2P10; PM  | -3.08 | -1.32 | 0.3   | 5.42E-06 | 0.0002 | PMS2 homolog 2, mismatch repair system component pseudogene 2; PMS2 homolog 2, mismatch repair system component pseudogene 7; PMS2 homolog 2, mismatch repair system component pseudogene 10; PMS2 homolog 2, mismatch repair system component pseudogene 6; PMS2 homolog 2, mismatch repair system component pseudogene 5 |
| PNMA1             | -3.13 | -1.28 | 0.36  | 2.63E-05 | 0.0003 | paraneoplastic Ma antigen 1                                                                                                                                                                                                                                                                                                |
| POLK              | -3.16 | -1.38 | 0.28  | 2.09E-05 | 0.0002 | polymerase (DNA directed) kappa                                                                                                                                                                                                                                                                                            |
| POLN; HAUS3       | 3.25  | 0.4   | -1.3  | 3.64E-05 | 0.0003 | polymerase (DNA directed) nu; HAUS augmin like complex subunit 3                                                                                                                                                                                                                                                           |
| POLR1B            | -3.23 | -1.41 | 0.28  | 6.30E-06 | 0.0002 | polymerase (RNA) I polypeptide B                                                                                                                                                                                                                                                                                           |
| POLR1E            | 3.26  | 0.32  | -1.38 | 3.86E-05 | 0.0003 | polymerase (RNA) I polypeptide E                                                                                                                                                                                                                                                                                           |
| POLR2H            | -3.04 | -1.28 | 0.32  | 2.82E-05 | 0.0003 | polymerase (RNA) II (DNA directed) polypeptide H                                                                                                                                                                                                                                                                           |
| POLR2J            | 3.53  | 0.44  | -1.38 | 3.17E-06 | 0.0002 | polymerase (RNA) II (DNA directed) polypeptide J, 13.3kDa                                                                                                                                                                                                                                                                  |

|                   |       |       |       |          |        |                                                                                                                                                                     |
|-------------------|-------|-------|-------|----------|--------|---------------------------------------------------------------------------------------------------------------------------------------------------------------------|
| 2J4; POLR2J3; POL | -3.02 | -1.31 | 0.28  | 5.11E-05 | 0.0004 | polymerase (RNA) II (DNA directed) polypeptide J4, pseudogene; polymerase (RNA) II (DNA directed) polypeptide J3; polymerase (RNA) II (DNA directed) polypeptide J2 |
| POLR2K            | -3.21 | -1.36 | 0.32  | 2.23E-05 | 0.0002 | polymerase (RNA) II (DNA directed) polypeptide K, 7.0kDa                                                                                                            |
| POM121L3P         | 3.6   | 0.38  | -1.47 | 9.14E-05 | 0.0005 | POM121 transmembrane nucleoporin-like 3, pseudogene                                                                                                                 |
| POMC              | -3.2  | -1.38 | 0.29  | 2.27E-05 | 0.0002 | proopiomelanocortin                                                                                                                                                 |
| POMGNT1           | -3.06 | -1.31 | 0.3   | 1.01E-05 | 0.0002 | protein O-linked mannose N-acetylglucosaminyltransferase 1 (beta 1,2-)                                                                                              |
| POSTN             | -3.03 | -1.32 | 0.28  | 4.03E-06 | 0.0002 | periostin, osteoblast specific factor                                                                                                                               |
| POTEG; POTEM      | -3.78 | -1.48 | 0.44  | 0.0002   | 0.0010 | POTE ankyrin domain family, member G; POTE ankyrin domain family, member M                                                                                          |
| POU1F1            | 3.49  | 0.41  | -1.39 | 2.61E-06 | 0.0002 | POU class 1 homeobox 1                                                                                                                                              |
| POU3F2            | -3.09 | -1.28 | 0.35  | 3.62E-05 | 0.0003 | POU class 3 homeobox 2                                                                                                                                              |
| POU5F1B           | 3.41  | 0.32  | -1.44 | 1.73E-05 | 0.0002 | POU class 5 homeobox 1B                                                                                                                                             |
| POU5F1P4          | 3.57  | 0.39  | -1.44 | 1.73E-05 | 0.0002 | POU class 5 homeobox 1 pseudogene 4                                                                                                                                 |
| POU6F2            | 3.36  | 0.36  | -1.39 | 2.13E-05 | 0.0002 | POU class 6 homeobox 2                                                                                                                                              |
| PPARA             | 3.23  | 0.4   | -1.29 | 2.46E-05 | 0.0002 | peroxisome proliferator-activated receptor alpha                                                                                                                    |
| PPFIA3            | 3.38  | 0.36  | -1.4  | 4.69E-05 | 0.0003 | protein tyrosine phosphatase, receptor type, f polypeptide (PTPRF), interacting protein (liprin), alpha 3                                                           |
| PPIAL4F; PPIAL4E  | 3.06  | 0.32  | -1.29 | 5.41E-06 | 0.0002 | peptidylprolyl isomerase A (cyclophilin A)-like 4F; peptidylprolyl isomerase A (cyclophilin A)-like 4E                                                              |
| PPIAL4F; PPIAL4E  | 3.06  | 0.32  | -1.29 | 5.41E-06 | 0.0002 | peptidylprolyl isomerase A (cyclophilin A)-like 4F; peptidylprolyl isomerase A (cyclophilin A)-like 4E                                                              |
| PPM1E             | -3.13 | -1.32 | 0.32  | 7.70E-06 | 0.0002 | protein phosphatase, Mg2+/Mn2+ dependent, 1E                                                                                                                        |
| PPM1N             | -3.36 | -1.38 | 0.36  | 2.39E-05 | 0.0002 | protein phosphatase, Mg2+/Mn2+ dependent, 1N (putative)                                                                                                             |
| PPP1R14D          | 3.22  | 0.26  | -1.43 | 9.54E-06 | 0.0002 | protein phosphatase 1, regulatory (inhibitor) subunit 14D                                                                                                           |
| PPP1R26           | -3.14 | -1.37 | 0.28  | 1.71E-05 | 0.0002 | protein phosphatase 1, regulatory subunit 26                                                                                                                        |
| PPP1R2P3          | -3.16 | -1.41 | 0.25  | 5.38E-05 | 0.0004 | protein phosphatase 1, regulatory (inhibitor) subunit 2 pseudogene 3                                                                                                |
| PPP1R32           | -3.01 | -1.31 | 0.28  | 1.19E-05 | 0.0002 | protein phosphatase 1, regulatory subunit 32                                                                                                                        |
| PPP1R35           | -3.12 | -1.36 | 0.28  | 8.17E-06 | 0.0002 | protein phosphatase 1, regulatory subunit 35                                                                                                                        |
| PPP1R3B           | 3.02  | 0.39  | -1.2  | 8.32E-06 | 0.0002 | protein phosphatase 1, regulatory subunit 3B                                                                                                                        |
| PPP1R7            | 3.11  | 0.21  | -1.43 | 3.69E-05 | 0.0003 | protein phosphatase 1, regulatory subunit 7                                                                                                                         |
| PPP1R9A           | -3.1  | -1.37 | 0.26  | 9.93E-06 | 0.0002 | protein phosphatase 1, regulatory subunit 9A                                                                                                                        |
| PPY2P             | -3.06 | -1.35 | 0.26  | 3.43E-05 | 0.0003 | pancreatic polypeptide 2, pseudogene                                                                                                                                |
| PQBP1             | -3.04 | -1.28 | 0.32  | 1.23E-05 | 0.0002 | polyglutamine binding protein 1                                                                                                                                     |
| PRAF2             | -3.16 | -1.4  | 0.26  | 7.15E-06 | 0.0002 | PRA1 domain family, member 2                                                                                                                                        |
| 19; PRAMEF18; PR  | -3.17 | -1.36 | 0.3   | 2.83E-05 | 0.0003 | PRAME family member 19; PRAME family member 18; PRAME family member 22                                                                                              |
| 19; PRAMEF18; PR  | -3.17 | -1.36 | 0.3   | 2.83E-05 | 0.0003 | PRAME family member 19; PRAME family member 18; PRAME family member 22                                                                                              |
| 8; PRAMEF         | 3.02  | 0.39  | -1.2  | 1.06E-05 | 0.0002 | PRAME family member 8; PRAME family member 7                                                                                                                        |
| 8; PRAMEF         | 3.02  | 0.39  | -1.2  | 1.06E-05 | 0.0002 | PRAME family member 8; PRAME family member 7                                                                                                                        |
| 8; PRAMEF         | 3.02  | 0.39  | -1.2  | 1.06E-05 | 0.0002 | PRAME family member 8; PRAME family member 7                                                                                                                        |
| PRDM11            | 3.28  | 0.28  | -1.44 | 8.65E-06 | 0.0002 | PR domain containing 11                                                                                                                                             |
| PRDM12            | -3.13 | -1.28 | 0.36  | 7.26E-05 | 0.0004 | PR domain containing 12                                                                                                                                             |
| PRDM2             | 3.41  | 0.32  | -1.44 | 1.23E-05 | 0.0002 | PR domain containing 2, with ZNF domain                                                                                                                             |
| PRDM7             | -3.06 | -1.38 | 0.23  | 0.0002   | 0.0008 | PR domain containing 7                                                                                                                                              |

|                |       |       |       |          |        |                                                                                                 |
|----------------|-------|-------|-------|----------|--------|-------------------------------------------------------------------------------------------------|
| PRELID3A       | -3.12 | -1.36 | 0.28  | 1.14E-05 | 0.0002 | PRELI domain containing 3A                                                                      |
| PRIM1          | 3.41  | 0.32  | -1.44 | 1.73E-05 | 0.0002 | primase, DNA, polypeptide 1 (49kDa)                                                             |
| PRKAA1         | -3.03 | -1.31 | 0.29  | 9.33E-06 | 0.0002 | protein kinase, AMP-activated, alpha 1 catalytic subunit                                        |
| PRKAB1         | -3.01 | -1.31 | 0.28  | 6.75E-05 | 0.0004 | protein kinase, AMP-activated, beta 1 non-catalytic subunit                                     |
| PRKAR1A        | -3.01 | -1.31 | 0.28  | 1.09E-05 | 0.0002 | protein kinase, cAMP-dependent, regulatory, type I, alpha                                       |
| PRKAR1B        | 3.1   | 0.43  | -1.2  | 0.0001   | 0.0007 | protein kinase, cAMP-dependent, regulatory, type I, beta                                        |
| PRKAR2A        | -3.12 | -1.35 | 0.29  | 1.23E-05 | 0.0002 | protein kinase, cAMP-dependent, regulatory, type II, alpha                                      |
| PRLR           | -3.06 | -1.28 | 0.33  | 1.05E-05 | 0.0002 | prolactin receptor                                                                              |
| PROCR          | -3.11 | -1.32 | 0.32  | 9.47E-05 | 0.0005 | protein C receptor, endothelial                                                                 |
| PROM2          | -3.13 | -1.28 | 0.36  | 1.74E-05 | 0.0002 | prominin 2                                                                                      |
| PRORY          | -3.13 | -1.28 | 0.36  | 0.0001   | 0.0006 | proline rich, Y-linked                                                                          |
| PROS1          | 3.11  | 0.43  | -1.2  | 0.0001   | 0.0006 | protein S (alpha)                                                                               |
| PRPF40B        | -3.07 | -1.38 | 0.24  | 2.62E-05 | 0.0003 | PRP40 homolog, pre-mRNA processing factor B                                                     |
| PRR21          | -3.01 | -1.31 | 0.28  | 2.98E-05 | 0.0003 | proline rich 21                                                                                 |
| PRR26          | -3.1  | -1.33 | 0.3   | 2.93E-05 | 0.0003 | proline rich 26                                                                                 |
| PRRT1          | 3.1   | 0.25  | -1.38 | 7.65E-05 | 0.0004 | proline-rich transmembrane protein 1                                                            |
| PRRT1          | 3.1   | 0.25  | -1.38 | 7.65E-05 | 0.0004 | proline-rich transmembrane protein 1                                                            |
| PRSS12         | -3.04 | -1.28 | 0.32  | 3.99E-05 | 0.0003 | protease, serine, 12 (neurotrypsin, motopsin)                                                   |
| PRSS33         | -3.03 | -1.36 | 0.24  | 3.68E-05 | 0.0003 | protease, serine, 33                                                                            |
| PRSS35         | -3.13 | -1.36 | 0.28  | 1.13E-05 | 0.0002 | protease, serine 35                                                                             |
| PRSS3P2; PRSS2 | 3.42  | 0.37  | -1.4  | 2.80E-05 | 0.0003 | protease, serine 3 pseudogene 2; protease, serine, 2 (trypsin 2)                                |
| PRSS54         | 3.26  | 0.3   | -1.4  | 4.07E-06 | 0.0002 | protease, serine, 54                                                                            |
| PRSS55         | -3.01 | -1.31 | 0.28  | 4.12E-05 | 0.0003 | protease, serine, 55                                                                            |
| PRSS8          | 3.22  | 0.31  | -1.38 | 1.60E-05 | 0.0002 | protease, serine, 8                                                                             |
| PSD            | -3.17 | -1.32 | 0.34  | 8.05E-06 | 0.0002 | pleckstrin and Sec7 domain containing                                                           |
| PSD4           | 3.42  | 0.38  | -1.39 | 1.25E-05 | 0.0002 | pleckstrin and Sec7 domain containing 4                                                         |
| PSG8; PSG10P   | -3.01 | -1.31 | 0.28  | 3.24E-05 | 0.0003 | pregnancy specific beta-1-glycoprotein 8; pregnancy specific beta-1-glycoprotein 10, pseudogene |
| PSG9           | -3.01 | -1.31 | 0.28  | 1.82E-05 | 0.0002 | pregnancy specific beta-1-glycoprotein 9                                                        |
| PSMB10         | 3.04  | 0.4   | -1.2  | 0.0004   | 0.0016 | proteasome subunit beta 10                                                                      |
| PSMB9          | 3.16  | 0.28  | -1.38 | 7.35E-06 | 0.0002 | proteasome subunit beta 9                                                                       |
| PSMB9          | 3.16  | 0.28  | -1.38 | 7.35E-06 | 0.0002 | proteasome subunit beta 9                                                                       |
| PSMB9          | 3.16  | 0.28  | -1.38 | 7.35E-06 | 0.0002 | proteasome subunit beta 9                                                                       |
| PSMD2          | -3.16 | -1.38 | 0.28  | 6.72E-06 | 0.0002 | proteasome 26S subunit, non-ATPase 2                                                            |
| PSMD3          | -3.2  | -1.31 | 0.36  | 2.30E-05 | 0.0002 | proteasome 26S subunit, non-ATPase 3                                                            |
| PSMD7          | 3.06  | 0.23  | -1.38 | 3.88E-05 | 0.0003 | proteasome 26S subunit, non-ATPase 7                                                            |
| PSORS1C2       | -3.01 | -1.31 | 0.28  | 1.07E-05 | 0.0002 | psoriasis susceptibility 1 candidate 2                                                          |
| PSPN           | -3.02 | -1.36 | 0.23  | 3.18E-05 | 0.0003 | persephin                                                                                       |
| PSRC1          | 3.13  | 0.35  | -1.29 | 4.84E-05 | 0.0003 | proline/serine-rich coiled-coil 1                                                               |

|                 |       |       |       |          |        |                                                                                                       |
|-----------------|-------|-------|-------|----------|--------|-------------------------------------------------------------------------------------------------------|
| PTBP2           | 3.23  | 0.25  | -1.44 | 3.57E-06 | 0.0002 | polypyrimidine tract binding protein 2                                                                |
| PTF1A           | 3.19  | 0.47  | -1.2  | 1.99E-05 | 0.0002 | pancreas specific transcription factor, 1a                                                            |
| PTGES2          | 3.3   | 0.32  | -1.4  | 9.55E-06 | 0.0002 | prostaglandin E synthase 2                                                                            |
| PTPN21          | 3.02  | 0.39  | -1.2  | 1.99E-05 | 0.0002 | protein tyrosine phosphatase, non-receptor type 21                                                    |
| PTPN3           | -3.03 | -1.31 | 0.29  | 1.05E-05 | 0.0002 | protein tyrosine phosphatase, non-receptor type 3                                                     |
| PTPRCAP; CORO1B | 3.02  | 0.39  | -1.2  | 1.45E-05 | 0.0002 | protein tyrosine phosphatase, receptor type, C-associated protein; coronin, actin binding protein, 1B |
| PTPRH           | 3.61  | 0.47  | -1.38 | 1.59E-05 | 0.0002 | protein tyrosine phosphatase, receptor type, H                                                        |
| PTPRU           | 3.09  | 0.34  | -1.29 | 7.66E-06 | 0.0002 | protein tyrosine phosphatase, receptor type, U                                                        |
| PTRH2           | -3.03 | -1.36 | 0.24  | 1.60E-05 | 0.0002 | peptidyl-tRNA hydrolase 2                                                                             |
| PUS1            | -3.07 | -1.28 | 0.34  | 2.90E-05 | 0.0003 | pseudouridylate synthase 1                                                                            |
| PUS10           | 3.3   | 0.32  | -1.4  | 4.22E-06 | 0.0002 | pseudouridylate synthase 10                                                                           |
| PYDC2           | -3.1  | -1.41 | 0.22  | 7.66E-05 | 0.0004 | pyrin domain containing 2                                                                             |
| PZP             | -3.12 | -1.36 | 0.28  | 2.92E-05 | 0.0003 | pregnancy-zone protein                                                                                |
| QARS            | -3.16 | -1.38 | 0.28  | 3.36E-05 | 0.0003 | glutaminyI-tRNA synthetase                                                                            |
| RAB11A          | 3.26  | 0.32  | -1.38 | 5.53E-05 | 0.0004 | RAB11A, member RAS oncogene family                                                                    |
| RAB11FIP2       | 3.26  | 0.32  | -1.38 | 5.09E-06 | 0.0002 | RAB11 family interacting protein 2 (class I)                                                          |
| RAB24; MXD3     | 3.37  | 0.32  | -1.43 | 4.44E-06 | 0.0002 | RAB24, member RAS oncogene family; MAX dimerization protein 3                                         |
| RAB37           | 3.42  | 0.39  | -1.38 | 9.19E-06 | 0.0002 | RAB37, member RAS oncogene family                                                                     |
| RAB3C           | -3.15 | -1.38 | 0.27  | 1.45E-05 | 0.0002 | RAB3C, member RAS oncogene family                                                                     |
| RAB42           | 3.47  | 0.38  | -1.41 | 3.88E-05 | 0.0003 | RAB42, member RAS oncogene family                                                                     |
| RAB43P1         | 3.32  | 0.34  | -1.39 | 1.46E-05 | 0.0002 | RAB43 pseudogene 1                                                                                    |
| RAB5A           | -3.04 | -1.28 | 0.32  | 4.46E-05 | 0.0003 | RAB5A, member RAS oncogene family                                                                     |
| RAB5B           | -3.15 | -1.35 | 0.31  | 5.71E-05 | 0.0004 | RAB5B, member RAS oncogene family                                                                     |
| RAB5C           | -3.16 | -1.32 | 0.34  | 5.83E-05 | 0.0004 | RAB5C, member RAS oncogene family                                                                     |
| RAB7A           | -3.27 | -1.36 | 0.35  | 1.50E-05 | 0.0002 | RAB7A, member RAS oncogene family                                                                     |
| RABL2B          | -3.06 | -1.33 | 0.28  | 0.0001   | 0.0006 | RAB, member of RAS oncogene family-like 2B                                                            |
| RABL2B; RABL2A  | -3.18 | -1.35 | 0.32  | 0.0007   | 0.0028 | RAB, member of RAS oncogene family-like 2B; RAB, member of RAS oncogene family-like 2A                |
| RABL3           | 3.13  | 0.26  | -1.38 | 1.74E-05 | 0.0002 | RAB, member of RAS oncogene family-like 3                                                             |
| RAD1            | -3.17 | -1.39 | 0.28  | 8.10E-05 | 0.0005 | RAD1 checkpoint DNA exonuclease                                                                       |
| RAD51C          | -3.02 | -1.38 | 0.21  | 4.74E-05 | 0.0003 | RAD51 paralog C                                                                                       |
| RAD54L          | 3.1   | 0.43  | -1.2  | 1.09E-05 | 0.0002 | RAD54-like (S. cerevisiae)                                                                            |
| RAET1G          | 3.52  | 0.43  | -1.38 | 2.02E-05 | 0.0002 | retinoic acid early transcript 1G                                                                     |
| RANBP17         | 3.14  | 0.26  | -1.39 | 5.65E-06 | 0.0002 | RAN binding protein 17                                                                                |
| RANBP3          | 3.25  | 0.38  | -1.31 | 1.00E-05 | 0.0002 | RAN binding protein 3                                                                                 |
| RANBP9          | -3.11 | -1.31 | 0.32  | 4.74E-06 | 0.0002 | RAN binding protein 9                                                                                 |
| RAPH1           | 3.13  | 0.2   | -1.44 | 1.02E-05 | 0.0002 | Ras association (RalGDS/AF-6) and pleckstrin homology domains 1                                       |
| RARRES2         | -3.09 | -1.28 | 0.35  | 7.20E-05 | 0.0004 | retinoic acid receptor responder (tazarotene induced) 2                                               |
| RASA4           | -3.37 | -1.48 | 0.28  | 1.94E-05 | 0.0002 | RAS p21 protein activator 4                                                                           |

|                   |       |       |       |          |        |                                                                                                                                                                                                                                                                                                                    |
|-------------------|-------|-------|-------|----------|--------|--------------------------------------------------------------------------------------------------------------------------------------------------------------------------------------------------------------------------------------------------------------------------------------------------------------------|
| RASL10A           | -3.08 | -1.32 | 0.3   | 0.0008   | 0.0029 | RAS-like, family 10, member A                                                                                                                                                                                                                                                                                      |
| RASSF4            | -3.22 | -1.41 | 0.27  | 1.01E-05 | 0.0002 | Ras association (RalGDS/AF-6) domain family member 4                                                                                                                                                                                                                                                               |
| RB1               | 3.24  | 0.3   | -1.4  | 4.13E-06 | 0.0002 | retinoblastoma 1                                                                                                                                                                                                                                                                                                   |
| BAK; RBAK-RBAKD   | 3.3   | 0.32  | -1.4  | 9.55E-06 | 0.0002 | RB-associated KRAB zinc finger; RBAK-RBAKDN readthrough                                                                                                                                                                                                                                                            |
| RBFA              | 3.4   | 0.45  | -1.31 | 3.61E-06 | 0.0002 | ribosome binding factor A (putative)                                                                                                                                                                                                                                                                               |
| RBM39             | 3.47  | 0.32  | -1.47 | 2.03E-05 | 0.0002 | RNA binding motif protein 39                                                                                                                                                                                                                                                                                       |
| IY1B; RBMY1D; RBN | 3.53  | 0.39  | -1.43 | 1.97E-05 | 0.0002 | RNA binding motif protein, Y-linked, family 1, member B; RNA binding motif protein, Y-linked, family 1, member D; RNA binding motif protein, Y-linked, family 1, member E                                                                                                                                          |
| 2FP; RBMY1D; RBM  | 3.42  | 0.39  | -1.38 | 5.27E-06 | 0.0002 | RNA binding motif protein, Y-linked, family 1, member B; RNA binding motif protein, Y-linked, family 2, member F pseudogene; RNA binding motif protein, Y-linked, family 1, member D; RNA binding motif protein, Y-linked, family 1, member E; RNA binding motif protein, Y-linked, family 1, member A3 pseudogene |
| RBPJL             | -3.23 | -1.31 | 0.38  | 1.08E-05 | 0.0002 | recombination signal binding protein for immunoglobulin kappa J region-like                                                                                                                                                                                                                                        |
| RCAN1             | 3.18  | 0.23  | -1.44 | 1.04E-05 | 0.0002 | regulator of calcineurin 1                                                                                                                                                                                                                                                                                         |
| RCAN2             | -3.22 | -1.28 | 0.4   | 7.59E-06 | 0.0002 | regulator of calcineurin 2                                                                                                                                                                                                                                                                                         |
| RDM1              | -3.01 | -1.31 | 0.28  | 3.95E-05 | 0.0003 | RAD52 motif containing 1                                                                                                                                                                                                                                                                                           |
| RECQL4            | -3.1  | -1.34 | 0.29  | 2.71E-05 | 0.0003 | RecQ helicase-like 4                                                                                                                                                                                                                                                                                               |
| REG3A             | -3.07 | -1.42 | 0.2   | 2.13E-05 | 0.0002 | regenerating islet-derived 3 alpha                                                                                                                                                                                                                                                                                 |
| RELN              | -3.13 | -1.41 | 0.23  | 1.13E-05 | 0.0002 | reelin                                                                                                                                                                                                                                                                                                             |
| REPS2             | 3.1   | 0.25  | -1.38 | 3.76E-05 | 0.0003 | RALBP1 associated Eps domain containing 2                                                                                                                                                                                                                                                                          |
| RER1              | -3.26 | -1.38 | 0.32  | 0.0001   | 0.0006 | retention in endoplasmic reticulum sorting receptor 1                                                                                                                                                                                                                                                              |
| RETN              | 3.37  | 0.32  | -1.43 | 2.42E-06 | 0.0002 | resistin                                                                                                                                                                                                                                                                                                           |
| REXO1L8P          | -3.03 | -1.28 | 0.32  | 4.11E-06 | 0.0002 | REX1, RNA exonuclease 1 homolog-like 8, pseudogene                                                                                                                                                                                                                                                                 |
| REXO1L8P          | -3.03 | -1.28 | 0.32  | 4.11E-06 | 0.0002 | REX1, RNA exonuclease 1 homolog-like 8, pseudogene                                                                                                                                                                                                                                                                 |
| REXO1L8P          | -3.03 | -1.28 | 0.32  | 4.11E-06 | 0.0002 | REX1, RNA exonuclease 1 homolog-like 8, pseudogene                                                                                                                                                                                                                                                                 |
| RFFL              | 3.39  | 0.32  | -1.44 | 3.05E-06 | 0.0002 | ring finger and FYVE-like domain containing E3 ubiquitin protein ligase                                                                                                                                                                                                                                            |
| RFK               | 3.02  | 0.22  | -1.38 | 4.01E-05 | 0.0003 | riboflavin kinase                                                                                                                                                                                                                                                                                                  |
| RFPL1             | -3.34 | -1.35 | 0.39  | 2.34E-05 | 0.0002 | ret finger protein-like 1                                                                                                                                                                                                                                                                                          |
| RFT1              | 3.61  | 0.47  | -1.38 | 0.0001   | 0.0006 | RFT1 homolog                                                                                                                                                                                                                                                                                                       |
| RGMA              | 3.5   | 0.42  | -1.38 | 2.16E-06 | 0.0002 | repulsive guidance molecule family member a                                                                                                                                                                                                                                                                        |
| RGS10             | -3.43 | -1.41 | 0.36  | 7.10E-06 | 0.0002 | regulator of G-protein signaling 10                                                                                                                                                                                                                                                                                |
| RHOB              | 3.06  | 0.41  | -1.2  | 5.39E-06 | 0.0002 | ras homolog family member B                                                                                                                                                                                                                                                                                        |
| RHOD              | -3.04 | -1.28 | 0.32  | 1.06E-05 | 0.0002 | ras homolog family member D                                                                                                                                                                                                                                                                                        |
| RHOXF1            | 3.43  | 0.48  | -1.3  | 1.87E-05 | 0.0002 | Rhox homeobox family, member 1                                                                                                                                                                                                                                                                                     |
| RIOK1             | 3.05  | 0.41  | -1.2  | 5.71E-05 | 0.0004 | RIO kinase 1                                                                                                                                                                                                                                                                                                       |
| RIPPLY1           | -3.01 | -1.31 | 0.28  | 5.26E-06 | 0.0002 | rippy transcriptional repressor 1                                                                                                                                                                                                                                                                                  |
| RIPPLY2           | -3.12 | -1.36 | 0.28  | 5.13E-05 | 0.0004 | rippy transcriptional repressor 2                                                                                                                                                                                                                                                                                  |
| RIT1              | -3.02 | -1.41 | 0.18  | 1.18E-05 | 0.0002 | Ras-like without CAAX 1                                                                                                                                                                                                                                                                                            |
| RITA1             | -3.14 | -1.37 | 0.28  | 6.22E-05 | 0.0004 | RBPJ interacting and tubulin associated 1                                                                                                                                                                                                                                                                          |
| RLN3; IL27RA      | -3.04 | -1.34 | 0.26  | 1.52E-05 | 0.0002 | relaxin 3; interleukin 27 receptor, alpha                                                                                                                                                                                                                                                                          |
| RNASE9            | -3.13 | -1.33 | 0.31  | 1.73E-05 | 0.0002 | ribonuclease, RNase A family, 9 (non-active)                                                                                                                                                                                                                                                                       |
| C17orf49; RNASEK- | -3.16 | -1.38 | 0.28  | 2.29E-05 | 0.0002 | ribonuclease, RNase K; chromosome 17 open reading frame 49; RNASEK-C17orf49 readthrough                                                                                                                                                                                                                            |

|                    |       |       |       |          |        |                                                                                                                                                                                                                                                        |
|--------------------|-------|-------|-------|----------|--------|--------------------------------------------------------------------------------------------------------------------------------------------------------------------------------------------------------------------------------------------------------|
| SEK; RNASEK-C17c   | -3.31 | -1.36 | 0.36  | 1.46E-05 | 0.0002 | ribonuclease, RNase K; RNASEK-C17orf49 readthrough                                                                                                                                                                                                     |
| RNF13              | -3.09 | -1.35 | 0.28  | 3.66E-06 | 0.0002 | ring finger protein 13                                                                                                                                                                                                                                 |
| RNF165             | -3.04 | -1.31 | 0.29  | 3.85E-05 | 0.0003 | ring finger protein 165                                                                                                                                                                                                                                |
| RNF166             | -3.18 | -1.28 | 0.39  | 4.42E-05 | 0.0003 | ring finger protein 166                                                                                                                                                                                                                                |
| RNF167             | 3.02  | 0.39  | -1.2  | 3.79E-05 | 0.0003 | ring finger protein 167                                                                                                                                                                                                                                |
| RNF183             | 3.51  | 0.41  | -1.4  | 3.46E-05 | 0.0003 | ring finger protein 183                                                                                                                                                                                                                                |
| RNF185-AS1         | 3.67  | 0.43  | -1.44 | 1.45E-05 | 0.0002 | RNF185 antisense RNA 1                                                                                                                                                                                                                                 |
| RNF219             | 3.2   | 0.25  | -1.43 | 1.29E-05 | 0.0002 | ring finger protein 219                                                                                                                                                                                                                                |
| RNF25              | 3.35  | 0.31  | -1.44 | 5.00E-06 | 0.0002 | ring finger protein 25                                                                                                                                                                                                                                 |
| RNF8               | 3.34  | 0.34  | -1.4  | 1.85E-05 | 0.0002 | ring finger protein 8, E3 ubiquitin protein ligase                                                                                                                                                                                                     |
| RNMTL1             | 3.02  | 0.39  | -1.2  | 1.06E-05 | 0.0002 | RNA methyltransferase like 1                                                                                                                                                                                                                           |
| RNU6-63P           | -3.04 | -1.28 | 0.32  | 3.42E-05 | 0.0003 | RNA, U6 small nuclear 63, pseudogene                                                                                                                                                                                                                   |
| RNU6-76P           | 3.01  | 0.29  | -1.3  | 3.66E-06 | 0.0002 | RNA, U6 small nuclear 76, pseudogene                                                                                                                                                                                                                   |
| L-4; RNU1-2; RNU1  | -3.25 | -1.43 | 0.27  | 9.26E-06 | 0.0002 | RNA, variant U1 small nuclear 18; RNA, U1 small nuclear 3; RNA, U1 small nuclear 4; RNA, U1 small nuclear 2; RNA, U1 small nuclear 1; RNA, U1 small nuclear 28, pseudogene; RNA, U1 small nuclear 27, pseudogene                                       |
| L-4; RNU1-2; RNU1  | -3.25 | -1.43 | 0.27  | 9.26E-06 | 0.0002 | RNA, variant U1 small nuclear 18; RNA, U1 small nuclear 3; RNA, U1 small nuclear 4; RNA, U1 small nuclear 2; RNA, U1 small nuclear 1; RNA, U1 small nuclear 28, pseudogene; RNA, U1 small nuclear 27, pseudogene                                       |
| L-4; RNU1-2; RNU1  | -3.36 | -1.48 | 0.27  | 0.0001   | 0.0007 | RNA, variant U1 small nuclear 18; RNA, U1 small nuclear 3; RNA, U1 small nuclear 4; RNA, U1 small nuclear 2; RNA, U1 small nuclear 1; RNA, U1 small nuclear 28, pseudogene; RNA, U1 small nuclear 27, pseudogene                                       |
| L-4; RNU1-2; RNU1  | -3.36 | -1.48 | 0.27  | 0.0001   | 0.0007 | RNA, variant U1 small nuclear 18; RNA, U1 small nuclear 3; RNA, U1 small nuclear 4; RNA, U1 small nuclear 2; RNA, U1 small nuclear 1; RNA, U1 small nuclear 28, pseudogene; RNA, U1 small nuclear 27, pseudogene                                       |
| L-4; RNU1-2; RNU1  | -3.36 | -1.48 | 0.27  | 0.0001   | 0.0007 | RNA, variant U1 small nuclear 18; RNA, U1 small nuclear 3; RNA, U1 small nuclear 4; RNA, U1 small nuclear 2; RNA, U1 small nuclear 1; RNA, U1 small nuclear 28, pseudogene; RNA, U1 small nuclear 27, pseudogene                                       |
| L-4; RNU1-2; RNU1  | -3.36 | -1.48 | 0.27  | 0.0001   | 0.0007 | RNA, variant U1 small nuclear 18; RNA, U1 small nuclear 3; RNA, U1 small nuclear 4; RNA, U1 small nuclear 2; RNA, U1 small nuclear 1; RNA, U1 small nuclear 28, pseudogene; RNA, U1 small nuclear 27, pseudogene                                       |
| U1-2; RNU1-1; RNU1 | -3.13 | -1.28 | 0.36  | 0.0003   | 0.0012 | RNA, variant U1 small nuclear 18; RNA, U1 small nuclear 3; RNA, U1 small nuclear 4; RNA, U1 small nuclear 2; RNA, U1 small nuclear 1; RNA, U1 small nuclear 28, pseudogene; RNA, U1 small nuclear 27, pseudogene; RNA, U1 small nuclear 13, pseudogene |
| U1-2; RNU1-1; RNU1 | -3.13 | -1.28 | 0.36  | 0.0003   | 0.0012 | RNA, variant U1 small nuclear 18; RNA, U1 small nuclear 3; RNA, U1 small nuclear 4; RNA, U1 small nuclear 2; RNA, U1 small nuclear 1; RNA, U1 small nuclear 28, pseudogene; RNA, U1 small nuclear 27, pseudogene; RNA, U1 small nuclear 13, pseudogene |
| RNVU1-19           | -3.15 | -1.36 | 0.29  | 3.87E-05 | 0.0003 | RNA, variant U1 small nuclear 19                                                                                                                                                                                                                       |
| RNVU1-6            | 3.54  | 0.44  | -1.38 | 9.42E-06 | 0.0002 | RNA, variant U1 small nuclear 6                                                                                                                                                                                                                        |
| RP9                | 3.56  | 0.54  | -1.29 | 7.33E-06 | 0.0002 | retinitis pigmentosa 9 (autosomal dominant)                                                                                                                                                                                                            |
| RPF2               | 3.55  | 0.39  | -1.44 | 2.67E-06 | 0.0002 | ribosome production factor 2 homolog                                                                                                                                                                                                                   |
| RPL13              | -3.36 | -1.38 | 0.36  | 1.39E-05 | 0.0002 | ribosomal protein L13                                                                                                                                                                                                                                  |
| RPL13AP3           | -3.08 | -1.31 | 0.31  | 1.36E-05 | 0.0002 | ribosomal protein L13a pseudogene 3                                                                                                                                                                                                                    |
| RPL15; RPL15P3     | -3.01 | -1.32 | 0.27  | 1.97E-05 | 0.0002 | ribosomal protein L15; ribosomal protein L15 pseudogene 3                                                                                                                                                                                              |
| PL17-C18orf32; SN  | 3.3   | 0.32  | -1.4  | 1.55E-05 | 0.0002 | ribosomal protein L17; RPL17-C18orf32 readthrough; small nucleolar RNA, C/D box 58B                                                                                                                                                                    |
| RPL22P19           | 3.43  | 0.35  | -1.43 | 1.32E-05 | 0.0002 | ribosomal protein L22 pseudogene 19                                                                                                                                                                                                                    |
| RPL26L1            | -3.04 | -1.28 | 0.32  | 0.0002   | 0.0009 | ribosomal protein L26-like 1                                                                                                                                                                                                                           |
| RPL29P33           | 3.26  | 0.28  | -1.43 | 2.18E-05 | 0.0002 | ribosomal protein L29 pseudogene 33                                                                                                                                                                                                                    |
| RPL3               | -3.04 | -1.28 | 0.32  | 2.57E-05 | 0.0003 | ribosomal protein L3                                                                                                                                                                                                                                   |
| RPL31              | 3.63  | 0.38  | -1.48 | 2.67E-05 | 0.0003 | ribosomal protein L31                                                                                                                                                                                                                                  |
| RPL31P57           | -3.43 | -1.41 | 0.36  | 8.47E-06 | 0.0002 | ribosomal protein L31 pseudogene 57                                                                                                                                                                                                                    |
| RPL35              | -3.16 | -1.31 | 0.35  | 3.20E-05 | 0.0003 | ribosomal protein L35                                                                                                                                                                                                                                  |
| RPL35A             | -3.06 | -1.28 | 0.33  | 5.84E-05 | 0.0004 | ribosomal protein L35a                                                                                                                                                                                                                                 |

|                       |       |       |       |          |        |                                                                                             |
|-----------------------|-------|-------|-------|----------|--------|---------------------------------------------------------------------------------------------|
| RPL4                  | 3.39  | 0.36  | -1.4  | 2.98E-05 | 0.0003 | ribosomal protein L4                                                                        |
| RPL6; RPL6P27         | -3.01 | -1.28 | 0.31  | 2.10E-05 | 0.0002 | ribosomal protein L6; ribosomal protein L6 pseudogene 27                                    |
| RPLP0                 | 3.19  | 0.47  | -1.2  | 1.99E-05 | 0.0002 | ribosomal protein, large, P0                                                                |
| RPLP2                 | -3.13 | -1.31 | 0.33  | 2.20E-05 | 0.0002 | ribosomal protein, large, P2                                                                |
| RPS10P7               | 3.53  | 0.39  | -1.43 | 1.46E-05 | 0.0002 | ribosomal protein S10 pseudogene 7                                                          |
| RPS11                 | 3.09  | 0.33  | -1.3  | 6.55E-05 | 0.0004 | ribosomal protein S11                                                                       |
| RPS11P5               | 3.37  | 0.32  | -1.43 | 8.46E-06 | 0.0002 | ribosomal protein S11 pseudogene 5                                                          |
| RPS19BP1              | 3.26  | 0.31  | -1.4  | 5.08E-06 | 0.0002 | ribosomal protein S19 binding protein 1                                                     |
| RPS2; RPS2P46         | 3.47  | 0.32  | -1.47 | 2.83E-06 | 0.0002 | ribosomal protein S2; ribosomal protein S2 pseudogene 46                                    |
| RPS25                 | -3.2  | -1.31 | 0.36  | 0.0001   | 0.0006 | ribosomal protein S25                                                                       |
| RPS3A; SNORD73A       | -3.11 | -1.31 | 0.32  | 2.67E-05 | 0.0003 | ribosomal protein S3A; small nucleolar RNA, C/D box 73A                                     |
| RPS6KA2               | -3.33 | -1.41 | 0.32  | 3.26E-05 | 0.0003 | ribosomal protein S6 kinase, 90kDa, polypeptide 2                                           |
| RPS6KA5               | -3.04 | -1.28 | 0.32  | 8.94E-05 | 0.0005 | ribosomal protein S6 kinase, 90kDa, polypeptide 5                                           |
| RRAGA                 | -3.33 | -1.37 | 0.36  | 5.26E-05 | 0.0004 | Ras-related GTP binding A                                                                   |
| RRM2                  | -3.05 | -1.32 | 0.29  | 4.39E-06 | 0.0002 | ribonucleotide reductase M2                                                                 |
| RSPO3                 | -3.12 | -1.36 | 0.28  | 6.00E-05 | 0.0004 | R-spondin 3                                                                                 |
| RSPO4                 | -3.37 | -1.31 | 0.44  | 2.40E-05 | 0.0002 | R-spondin 4                                                                                 |
| RTF1                  | -3.16 | -1.38 | 0.28  | 8.00E-06 | 0.0002 | RTF1 homolog, Paf1/RNA polymerase II complex component                                      |
| RTL1                  | -3.3  | -1.4  | 0.32  | 2.69E-05 | 0.0003 | retrotransposon-like 1                                                                      |
| RTN1                  | -3.02 | -1.28 | 0.31  | 1.83E-05 | 0.0002 | reticulon 1                                                                                 |
| RTN4R                 | -3.09 | -1.33 | 0.29  | 6.87E-05 | 0.0004 | reticulon 4 receptor                                                                        |
| RTN4RL1               | 3.26  | 0.32  | -1.38 | 5.09E-06 | 0.0002 | reticulon 4 receptor-like 1                                                                 |
| RUBCN                 | -3.06 | -1.33 | 0.28  | 2.84E-05 | 0.0003 | RUN domain and cysteine-rich domain containing, Beclin 1-interacting protein                |
| RUFY2                 | -3.22 | -1.36 | 0.32  | 1.68E-05 | 0.0002 | RUN and FYVE domain containing 2                                                            |
| RUNDC3B               | 3.31  | 0.33  | -1.4  | 5.20E-06 | 0.0002 | RUN domain containing 3B                                                                    |
| RUNX1T1               | 3.51  | 0.41  | -1.4  | 6.35E-06 | 0.0002 | runt-related transcription factor 1; translocated to, 1 (cyclin D-related)                  |
| RWD3; TMEM56-RW       | -3.26 | -1.38 | 0.32  | 5.20E-05 | 0.0004 | RWD domain containing 3; TMEM56-RWDD3 readthrough                                           |
| RXFP4                 | 3.28  | 0.33  | -1.38 | 3.58E-06 | 0.0002 | relaxin/insulin-like family peptide receptor 4                                              |
| S100A13               | 3.06  | 0.23  | -1.38 | 3.45E-06 | 0.0002 | S100 calcium binding protein A13                                                            |
| S100A5                | -3.23 | -1.38 | 0.31  | 8.51E-06 | 0.0002 | S100 calcium binding protein A5                                                             |
| S100A6                | -3    | -1.33 | 0.25  | 2.19E-05 | 0.0002 | S100 calcium binding protein A6                                                             |
| S100A9                | 3.37  | 0.32  | -1.43 | 3.83E-05 | 0.0003 | S100 calcium binding protein A9                                                             |
| S1PR1                 | -3.03 | -1.32 | 0.28  | 1.62E-05 | 0.0002 | sphingosine-1-phosphate receptor 1                                                          |
| SAMD1                 | 3.52  | 0.43  | -1.38 | 4.85E-06 | 0.0002 | sterile alpha motif domain containing 1                                                     |
| SAMD9L                | 3.37  | 0.32  | -1.43 | 5.90E-05 | 0.0004 | sterile alpha motif domain containing 9-like                                                |
| SAP30L                | 3.11  | 0.26  | -1.38 | 1.22E-05 | 0.0002 | SAP30-like                                                                                  |
| SAPCD1; MSH5; MSH5-S. | -3.11 | -1.38 | 0.26  | 2.67E-05 | 0.0003 | suppressor APC domain containing 1; mutS homolog 5; MSH5-SAPCD1 readthrough (NMD candidate) |
| SAPCD2                | -3.09 | -1.28 | 0.35  | 1.65E-05 | 0.0002 | suppressor APC domain containing 2                                                          |



|                    |     |       |       |       |          |        |                                                                                                                                             |                                |
|--------------------|-----|-------|-------|-------|----------|--------|---------------------------------------------------------------------------------------------------------------------------------------------|--------------------------------|
| SAYS               | SD1 | 3.3   | 0.32  | -1.4  | 3.29E-06 | 0.0002 | SAYS                                                                                                                                        | SVFN motif domain containing 1 |
| SBNO               | 2   | -3.02 | -1.33 | 0.26  | 1.27E-05 | 0.0002 | strawberry notch homolog 2 (Drosophila)                                                                                                     |                                |
| SCAF               | 11  | 3.07  | 0.24  | -1.38 | 8.25E-06 | 0.0002 | SR-related CTD-associated factor 11                                                                                                         |                                |
| SCAPER             |     | -3.21 | -1.38 | 0.3   | 9.66E-06 | 0.0002 | S-phase cyclin A-associated protein in the ER                                                                                               |                                |
| NA16; MIR6516; SN  |     | 3.04  | 0.19  | -1.41 | 1.18E-05 | 0.0002 | small Cajal body-specific RNA 16; microRNA 6516; small nucleolar RNA host gene 20                                                           |                                |
| SCARNA             | 17  | 3.39  | 0.56  | -1.2  | 3.14E-06 | 0.0002 | small Cajal body-specific RNA 17                                                                                                            |                                |
| SCARNA             | 5   | 3.32  | 0.26  | -1.47 | 7.47E-06 | 0.0002 | small Cajal body-specific RNA 5                                                                                                             |                                |
| SCG5               |     | -3.19 | -1.38 | 0.29  | 6.35E-05 | 0.0004 | secretogranin V                                                                                                                             |                                |
| SCGB2A             | 1   | -3.12 | -1.36 | 0.28  | 0.0001   | 0.0007 | secretoglobin, family 2A, member 1                                                                                                          |                                |
| SCGB3A             | 2   | -3.28 | -1.43 | 0.28  | 1.34E-05 | 0.0002 | secretoglobin, family 3A, member 2                                                                                                          |                                |
| SCN5A              |     | -3.01 | -1.31 | 0.28  | 7.59E-06 | 0.0002 | sodium channel, voltage gated, type V alpha subunit                                                                                         |                                |
| SCN7A              |     | -3.22 | -1.28 | 0.41  | 8.64E-06 | 0.0002 | sodium channel, voltage gated, type VII alpha subunit                                                                                       |                                |
| SCNM               | 1   | -3.12 | -1.36 | 0.28  | 4.00E-05 | 0.0003 | sodium channel modifier 1                                                                                                                   |                                |
| SCP2D              | 1   | -3.11 | -1.31 | 0.32  | 5.24E-06 | 0.0002 | SCP2 sterol-binding domain containing 1                                                                                                     |                                |
| SDC3               |     | -3.02 | -1.28 | 0.31  | 3.34E-05 | 0.0003 | syndecan 3                                                                                                                                  |                                |
| SDF2L              | 1   | -3.15 | -1.37 | 0.28  | 7.40E-06 | 0.0002 | stromal cell-derived factor 2-like 1                                                                                                        |                                |
| SDHAF              | 2   | -3.26 | -1.38 | 0.32  | 5.11E-05 | 0.0004 | succinate dehydrogenase complex assembly factor 2                                                                                           |                                |
| SDHAP2; SDHAP1     |     | -3.03 | -1.33 | 0.27  | 6.60E-05 | 0.0004 | succinate dehydrogenase complex subunit A, flavoprotein pseudogene 2; succinate dehydrogenase complex subunit A, flavoprotein pseudogene 1  |                                |
| SEC22B             |     | -3.16 | -1.38 | 0.28  | 6.09E-05 | 0.0004 | SEC22 homolog B, vesicle trafficking protein (gene/pseudogene)                                                                              |                                |
| SEC61A             | 1   | 3.05  | 0.23  | -1.38 | 7.53E-06 | 0.0002 | Sec61 translocon alpha 1 subunit                                                                                                            |                                |
| SELP               |     | -3.06 | -1.33 | 0.28  | 1.25E-05 | 0.0002 | selectin P (granule membrane protein 140kDa, antigen CD62)                                                                                  |                                |
| SEMA3C             |     | -3.11 | -1.31 | 0.32  | 3.71E-05 | 0.0003 | sema domain, immunoglobulin domain (Ig), short basic domain, secreted, (semaphorin) 3C                                                      |                                |
| SEMA5A             |     | -3.2  | -1.31 | 0.36  | 0.0001   | 0.0006 | sema domain, seven thrombospondin repeats (type 1 and type 1-like), transmembrane domain (TM) and short cytoplasmic domain, (semaphorin) 5A |                                |
| SEMA6C             |     | -3.14 | -1.37 | 0.28  | 5.50E-05 | 0.0004 | sema domain, transmembrane domain (TM), and cytoplasmic domain, (semaphorin) 6C                                                             |                                |
| SEMA6D             |     | 3.01  | 0.29  | -1.3  | 1.77E-05 | 0.0002 | sema domain, transmembrane domain (TM), and cytoplasmic domain, (semaphorin) 6D                                                             |                                |
| SENP               | 1   | 3.26  | 0.32  | -1.38 | 6.88E-06 | 0.0002 | SUMO1/sentrin specific peptidase 1                                                                                                          |                                |
| SENP3; SENP3-EIF4A |     | 3.34  | 0.36  | -1.38 | 1.71E-05 | 0.0002 | SUMO1/sentrin/SMT3 specific peptidase 3; SENP3-EIF4A1 readthrough (NMD candidate)                                                           |                                |
| SEPHS              | 1   | 3.36  | 0.46  | -1.29 | 0.0001   | 0.0007 | selenophosphate synthetase 1                                                                                                                |                                |
| SEPN               | 1   | 3.13  | 0.24  | -1.4  | 5.26E-06 | 0.0002 | selenoprotein N, 1                                                                                                                          |                                |
| SEPT               | 10  | -3.16 | -1.31 | 0.35  | 0.0005   | 0.0021 | septin 10                                                                                                                                   |                                |
| SEPT               | 11  | -3.16 | -1.38 | 0.28  | 5.64E-05 | 0.0004 | septin 11                                                                                                                                   |                                |
| SEPT               | 14  | -3.12 | -1.36 | 0.28  | 2.39E-05 | 0.0002 | septin 14                                                                                                                                   |                                |
| SEPT3; WBP2NL      |     | -3.23 | -1.36 | 0.33  | 2.15E-05 | 0.0002 | septin 3; WBP2 N-terminal like                                                                                                              |                                |
| SERGEF             |     | -3.03 | -1.32 | 0.28  | 1.25E-05 | 0.0002 | secretion regulating guanine nucleotide exchange factor                                                                                     |                                |
| SERPINA            | 13P | -3.13 | -1.28 | 0.36  | 6.94E-05 | 0.0004 | serpin peptidase inhibitor, clade A (alpha-1 antiproteinase, antitrypsin), member 13, pseudogene                                            |                                |
| SERPINC            | 1   | -3.2  | -1.31 | 0.36  | 4.46E-05 | 0.0003 | serpin peptidase inhibitor, clade C (antithrombin), member 1                                                                                |                                |
| SERPINF            | 1   | 3.06  | 0.23  | -1.38 | 6.21E-06 | 0.0002 | serpin peptidase inhibitor, clade F (alpha-2 antiplasmin, pigment epithelium derived factor), member 1                                      |                                |
| SERTAD             | 2   | -3.06 | -1.31 | 0.3   | 2.83E-05 | 0.0003 | SERTA domain containing 2                                                                                                                   |                                |

|          |       |       |       |          |        |                                                                      |
|----------|-------|-------|-------|----------|--------|----------------------------------------------------------------------|
| SERTM1   | 3.3   | 0.32  | -1.4  | 2.61E-06 | 0.0002 | serine-rich and transmembrane domain containing 1                    |
| SETD1B   | -3    | -1.28 | 0.31  | 0.0002   | 0.0009 | SET domain containing 1B                                             |
| SETD6    | -3.12 | -1.36 | 0.28  | 7.39E-06 | 0.0002 | SET domain containing 6                                              |
| SETDB1   | -3.07 | -1.34 | 0.28  | 9.85E-05 | 0.0005 | SET domain, bifurcated 1                                             |
| SF3B2    | -3.23 | -1.41 | 0.28  | 6.26E-06 | 0.0002 | splicing factor 3b subunit 2                                         |
| SF3B6    | -3.22 | -1.32 | 0.36  | 8.17E-05 | 0.0005 | splicing factor 3b subunit 6                                         |
| SFPQ     | -3.37 | -1.48 | 0.28  | 0.0001   | 0.0007 | splicing factor proline/glutamine-rich                               |
| SFXN2    | -3.33 | -1.33 | 0.4   | 4.62E-05 | 0.0003 | sideroflexin 2                                                       |
| SGIP1    | -3.04 | -1.38 | 0.22  | 0.0002   | 0.0008 | SH3-domain GRB2-like (endophilin) interacting protein 1              |
| SGK494   | -3    | -1.36 | 0.22  | 2.86E-05 | 0.0003 | uncharacterized serine/threonine-protein kinase SgK494               |
| SGSM2    | 3.12  | 0.44  | -1.2  | 5.86E-06 | 0.0002 | small G protein signaling modulator 2                                |
| SH2D3C   | 3.06  | 0.41  | -1.2  | 7.53E-06 | 0.0002 | SH2 domain containing 3C                                             |
| SH2D4A   | -3.01 | -1.31 | 0.28  | 5.24E-06 | 0.0002 | SH2 domain containing 4A                                             |
| SH3PXD2B | -3.14 | -1.37 | 0.28  | 4.31E-05 | 0.0003 | SH3 and PX domains 2B                                                |
| SH3RF1   | -3.13 | -1.36 | 0.28  | 2.64E-05 | 0.0003 | SH3 domain containing ring finger 1                                  |
| SHB      | 3.3   | 0.32  | -1.4  | 4.06E-05 | 0.0003 | Src homology 2 domain containing adaptor protein B                   |
| SHISA6   | 3.57  | 0.32  | -1.51 | 4.63E-06 | 0.0002 | shisa family member 6                                                |
| SIAH3    | -3.26 | -1.35 | 0.36  | 0.0002   | 0.0008 | siah E3 ubiquitin protein ligase family member 3                     |
| SIGLEC10 | 3.57  | 0.39  | -1.44 | 1.11E-05 | 0.0002 | sialic acid binding Ig-like lectin 10                                |
| SIGMAR1  | -3.11 | -1.32 | 0.32  | 9.87E-06 | 0.0002 | sigma non-opioid intracellular receptor 1                            |
| SIPA1L1  | -3.16 | -1.47 | 0.19  | 1.08E-05 | 0.0002 | signal-induced proliferation-associated 1 like 1                     |
| SIPA1L2  | 3.13  | 0.26  | -1.38 | 5.22E-05 | 0.0004 | signal-induced proliferation-associated 1 like 2                     |
| SIRT1    | -3.03 | -1.3  | 0.31  | 5.09E-05 | 0.0003 | sirtuin 1                                                            |
| SIRT3    | 3.03  | 0.31  | -1.29 | 7.55E-05 | 0.0004 | sirtuin 3                                                            |
| SIVA1    | 3.02  | 0.39  | -1.2  | 1.27E-05 | 0.0002 | SIVA1, apoptosis-inducing factor                                     |
| SIX6     | 3.42  | 0.39  | -1.38 | 7.13E-05 | 0.0004 | SIX homeobox 6                                                       |
| SKA3     | 3.06  | 0.32  | -1.29 | 9.65E-06 | 0.0002 | spindle and kinetochore associated complex subunit 3                 |
| SKIDA1   | -3.24 | -1.34 | 0.36  | 1.24E-05 | 0.0002 | SKI/DACH domain containing 1                                         |
| SKIV2L   | 3.19  | 0.24  | -1.44 | 3.06E-06 | 0.0002 | SKI2 homolog, superkiller viralicidic activity 2-like                |
| SKIV2L   | 3.11  | 0.19  | -1.44 | 3.97E-06 | 0.0002 | SKI2 homolog, superkiller viralicidic activity 2-like                |
| SKIV2L   | 3.11  | 0.19  | -1.44 | 3.97E-06 | 0.0002 | SKI2 homolog, superkiller viralicidic activity 2-like                |
| SKOR2    | 3.51  | 0.43  | -1.38 | 4.35E-06 | 0.0002 | SKI family transcriptional corepressor 2                             |
| SLAMF7   | -3.05 | -1.31 | 0.3   | 1.69E-05 | 0.0002 | SLAM family member 7                                                 |
| SLC12A7  | 3.01  | 0.19  | -1.4  | 4.11E-05 | 0.0003 | solute carrier family 12 (potassium/chloride transporter), member 7  |
| SLC12A8  | -3.19 | -1.37 | 0.3   | 9.10E-06 | 0.0002 | solute carrier family 12, member 8                                   |
| SLC17A2  | 3.52  | 0.43  | -1.38 | 6.31E-06 | 0.0002 | solute carrier family 17, member 2                                   |
| SLC18A2  | -3.25 | -1.37 | 0.33  | 3.54E-05 | 0.0003 | solute carrier family 18 (vesicular monoamine transporter), member 2 |
| SLC1A7   | -3.19 | -1.33 | 0.34  | 8.91E-06 | 0.0002 | solute carrier family 1 (glutamate transporter), member 7            |

|                  |       |       |       |          |        |                                                                                                                                                                                                                                                                                  |
|------------------|-------|-------|-------|----------|--------|----------------------------------------------------------------------------------------------------------------------------------------------------------------------------------------------------------------------------------------------------------------------------------|
| SLC20A1          | -3.01 | -1.36 | 0.23  | 6.60E-06 | 0.0002 | solute carrier family 20 (phosphate transporter), member 1                                                                                                                                                                                                                       |
| SLC25A29         | 3.01  | 0.14  | -1.44 | 2.01E-05 | 0.0002 | solute carrier family 25 (mitochondrial carnitine/acylcarnitine carrier), member 29                                                                                                                                                                                              |
| SLC25A30         | 3.3   | 0.32  | -1.4  | 1.49E-05 | 0.0002 | solute carrier family 25, member 30                                                                                                                                                                                                                                              |
| SLC25A6          | 3.02  | 0.39  | -1.2  | 1.11E-05 | 0.0002 | solute carrier family 25 (mitochondrial carrier; adenine nucleotide translocator), member 6                                                                                                                                                                                      |
| SLC25A6          | 3.02  | 0.39  | -1.2  | 1.11E-05 | 0.0002 | solute carrier family 25 (mitochondrial carrier; adenine nucleotide translocator), member 6                                                                                                                                                                                      |
| SLC26A3          | -3.44 | -1.46 | 0.32  | 1.84E-05 | 0.0002 | solute carrier family 26 (anion exchanger), member 3                                                                                                                                                                                                                             |
| SLC29A4          | 3.37  | 0.34  | -1.41 | 0.0002   | 0.0009 | solute carrier family 29 (equilibrative nucleoside transporter), member 4                                                                                                                                                                                                        |
| SLC2A11          | 3.06  | 0.32  | -1.29 | 2.69E-05 | 0.0003 | solute carrier family 2 (facilitated glucose transporter), member 11                                                                                                                                                                                                             |
| SLC2A13          | 3.42  | 0.39  | -1.38 | 9.75E-06 | 0.0002 | solute carrier family 2 (facilitated glucose transporter), member 13                                                                                                                                                                                                             |
| SLC34A3          | -3.06 | -1.33 | 0.28  | 0.0002   | 0.0009 | solute carrier family 34 (type II sodium/phosphate cotransporter), member 3                                                                                                                                                                                                      |
| SLC35D3          | -3.12 | -1.36 | 0.28  | 3.66E-05 | 0.0003 | solute carrier family 35, member D3                                                                                                                                                                                                                                              |
| SLC37A4          | 3.39  | 0.32  | -1.44 | 5.09E-06 | 0.0002 | solute carrier family 37 (glucose-6-phosphate transporter), member 4                                                                                                                                                                                                             |
| SLC38A2          | -3.15 | -1.38 | 0.27  | 8.13E-06 | 0.0002 | solute carrier family 38, member 2                                                                                                                                                                                                                                               |
| SLC38A5          | -3.14 | -1.37 | 0.28  | 2.22E-05 | 0.0002 | solute carrier family 38, member 5                                                                                                                                                                                                                                               |
| SLC39A13         | -3.06 | -1.4  | 0.22  | 9.37E-06 | 0.0002 | solute carrier family 39 (zinc transporter), member 13                                                                                                                                                                                                                           |
| SLC44A1          | 3.4   | 0.35  | -1.41 | 8.58E-06 | 0.0002 | solute carrier family 44 (choline transporter), member 1                                                                                                                                                                                                                         |
| SLC5A6           | -3.1  | -1.28 | 0.35  | 4.80E-06 | 0.0002 | solute carrier family 5 (sodium/multivitamin and iodide cotransporter), member 6                                                                                                                                                                                                 |
| SLC7A1           | 3.06  | 0.41  | -1.2  | 1.02E-05 | 0.0002 | solute carrier family 7 (cationic amino acid transporter, y+ system), member 1                                                                                                                                                                                                   |
| SLC7A14          | 3.59  | 0.37  | -1.47 | 1.15E-05 | 0.0002 | solute carrier family 7, member 14                                                                                                                                                                                                                                               |
| SLC9A1           | -3.08 | -1.36 | 0.26  | 9.48E-06 | 0.0002 | solute carrier family 9, subfamily A (NHE1, cation proton antiporter 1), member 1                                                                                                                                                                                                |
| SLCO2A1          | -3.12 | -1.36 | 0.28  | 7.02E-06 | 0.0002 | solute carrier organic anion transporter family, member 2A1                                                                                                                                                                                                                      |
| SLCO3A1          | 3.26  | 0.32  | -1.38 | 1.73E-05 | 0.0002 | solute carrier organic anion transporter family, member 3A1                                                                                                                                                                                                                      |
| SLFN13           | -3.13 | -1.36 | 0.28  | 2.61E-05 | 0.0003 | schlafen family member 13                                                                                                                                                                                                                                                        |
| SLX1A-SULT1A3; S | 3.54  | 0.4   | -1.43 | 4.28E-06 | 0.0002 | SLX1 homolog A, structure-specific endonuclease subunit; sulfotransferase family 1A member 4; SLX1 homolog B, structure-specific endonuclease subunit; SLX1A-SULT1A3 readthrough (RMD candidate); SLX1B-SULT1A4 readthrough (RMD candidate); sulfotransferase family 1A member 3 |
| SLX1B-SULT1A4; S | 3.54  | 0.4   | -1.43 | 1.45E-05 | 0.0002 | SLX1 homolog A, structure-specific endonuclease subunit; sulfotransferase family 1A member 4; SLX1 homolog B, structure-specific endonuclease subunit; SLX1B-SULT1A4 readthrough (RMD candidate); SLX1A-SULT1A3 readthrough (RMD candidate); sulfotransferase family 1A member 3 |
| SMARCC2          | -3.07 | -1.36 | 0.25  | 6.06E-06 | 0.0002 | SWI/SNF related, matrix associated, actin dependent regulator of chromatin, subfamily c, member 2                                                                                                                                                                                |
| SMARCD1          | -3.01 | -1.42 | 0.17  | 7.78E-05 | 0.0005 | SWI/SNF related, matrix associated, actin dependent regulator of chromatin, subfamily d, member 1                                                                                                                                                                                |
| SMCR8            | -3.12 | -1.36 | 0.28  | 4.67E-06 | 0.0002 | Smith-Magenis syndrome chromosome region, candidate 8                                                                                                                                                                                                                            |
| SMG9             | 3.01  | 0.3   | -1.29 | 2.28E-05 | 0.0002 | SMG9 nonsense mediated mRNA decay factor                                                                                                                                                                                                                                         |
| SMIM10L2A        | 3.3   | 0.32  | -1.4  | 8.00E-05 | 0.0005 | small integral membrane protein 10 like 2A                                                                                                                                                                                                                                       |
| SMIM10L2B        | -3.16 | -1.31 | 0.35  | 9.15E-06 | 0.0002 | small integral membrane protein 10 like 2B                                                                                                                                                                                                                                       |
| SMIM11P1         | -3.12 | -1.36 | 0.28  | 9.52E-06 | 0.0002 | small integral membrane protein 11 pseudogene 1                                                                                                                                                                                                                                  |
| SMIM20           | -3.37 | -1.38 | 0.37  | 0.0001   | 0.0007 | small integral membrane protein 20                                                                                                                                                                                                                                               |
| SMPD1            | 3.34  | 0.34  | -1.4  | 3.19E-06 | 0.0002 | sphingomyelin phosphodiesterase 1, acid lysosomal                                                                                                                                                                                                                                |
| SMR3A; SMR3B     | -3.29 | -1.4  | 0.32  | 1.37E-05 | 0.0002 | submaxillary gland androgen regulated protein 3A; submaxillary gland androgen regulated protein 3B                                                                                                                                                                               |
| SMU1             | -3.09 | -1.41 | 0.22  | 1.09E-05 | 0.0002 | smu-1 suppressor of mec-8 and unc-52 homolog (C. elegans)                                                                                                                                                                                                                        |
| SNAP25           | -3.08 | -1.38 | 0.24  | 9.13E-05 | 0.0005 | synaptosome associated protein 25kDa                                                                                                                                                                                                                                             |
| SNAPIN           | -3.14 | -1.3  | 0.36  | 1.91E-05 | 0.0002 | SNAP-associated protein                                                                                                                                                                                                                                                          |

|                  |       |       |       |          |        |                                                                                                            |
|------------------|-------|-------|-------|----------|--------|------------------------------------------------------------------------------------------------------------|
| SNORA22          | -3.21 | -1.34 | 0.35  | 1.24E-05 | 0.0002 | small nucleolar RNA, H/ACA box 22                                                                          |
| SNORA24; SNHG8   | -3.16 | -1.38 | 0.28  | 1.09E-05 | 0.0002 | small nucleolar RNA, H/ACA box 24; small nucleolar RNA host gene 8                                         |
| SNORA28          | 3.26  | 0.32  | -1.38 | 3.43E-06 | 0.0002 | small nucleolar RNA, H/ACA box 28                                                                          |
| SNORA52; RPLP2   | -3    | -1.33 | 0.25  | 1.08E-05 | 0.0002 | small nucleolar RNA, H/ACA box 52; ribosomal protein, large, P2                                            |
| SNORA64; RPS2    | -3.06 | -1.33 | 0.28  | 3.92E-05 | 0.0003 | small nucleolar RNA, H/ACA box 64; ribosomal protein S2                                                    |
| SNORA71A         | 3.02  | 0.39  | -1.2  | 7.18E-05 | 0.0004 | small nucleolar RNA, H/ACA box 71A                                                                         |
| SNORA71C         | -3.16 | -1.38 | 0.28  | 0.0001   | 0.0007 | small nucleolar RNA, H/ACA box 71C                                                                         |
| SNORA71D         | -3.22 | -1.36 | 0.32  | 0.0001   | 0.0007 | small nucleolar RNA, H/ACA box 71D                                                                         |
| SNORD104         | -3.04 | -1.28 | 0.32  | 0.0002   | 0.0008 | small nucleolar RNA, C/D box 104                                                                           |
| SNORD115-25      | 3.3   | 0.32  | -1.4  | 8.83E-06 | 0.0002 | small nucleolar RNA, C/D box 115-25                                                                        |
| SNORD115-3       | 3.78  | 0.44  | -1.48 | 5.46E-06 | 0.0002 | small nucleolar RNA, C/D box 115-3                                                                         |
| SNORD116-18      | 3.05  | 0.19  | -1.41 | 0.0002   | 0.0010 | small nucleolar RNA, C/D box 116-18                                                                        |
| D116-19; SNORD1  | -3.12 | -1.36 | 0.28  | 2.65E-05 | 0.0003 | small nucleolar RNA, C/D box 116-19; small nucleolar RNA, C/D box 116-17                                   |
| D116-19; SNORD1  | -3.12 | -1.36 | 0.28  | 2.65E-05 | 0.0003 | small nucleolar RNA, C/D box 116-19; small nucleolar RNA, C/D box 116-17                                   |
| SNORD116-24      | -3.01 | -1.31 | 0.28  | 4.82E-05 | 0.0003 | small nucleolar RNA, C/D box 116-24                                                                        |
| SNORD13; SNORD13 | -3.29 | -1.31 | 0.4   | 3.10E-05 | 0.0003 | small nucleolar RNA, C/D box 13; small nucleolar RNA, C/D box 13 pseudogene 3                              |
| SNORD43; RPL3    | -3.01 | -1.31 | 0.28  | 5.69E-06 | 0.0002 | small nucleolar RNA, C/D box 43; ribosomal protein L3                                                      |
| SNORD95; GNB2L1  | -3.13 | -1.28 | 0.36  | 3.88E-05 | 0.0003 | small nucleolar RNA, C/D box 95; guanine nucleotide binding protein (G protein), beta polypeptide 2-like 1 |
| SNRPA1           | 3.42  | 0.39  | -1.38 | 5.60E-05 | 0.0004 | small nuclear ribonucleoprotein polypeptide A                                                              |
| SNRPF            | 3.06  | 0.21  | -1.4  | 1.52E-05 | 0.0002 | small nuclear ribonucleoprotein polypeptide F                                                              |
| SNX12            | -3.27 | -1.28 | 0.43  | 2.94E-05 | 0.0003 | sorting nexin 12                                                                                           |
| SNX18            | -3.07 | -1.31 | 0.31  | 8.68E-06 | 0.0002 | sorting nexin 18                                                                                           |
| SNX31            | 3.04  | 0.22  | -1.38 | 0.0004   | 0.0016 | sorting nexin 31                                                                                           |
| SNX9             | -3.25 | -1.38 | 0.32  | 0.0002   | 0.0009 | sorting nexin 9                                                                                            |
| SOHLH1           | -3.14 | -1.37 | 0.28  | 2.94E-05 | 0.0003 | spermatogenesis and oogenesis specific basic helix-loop-helix 1                                            |
| SORBS1           | -3.09 | -1.36 | 0.26  | 1.58E-05 | 0.0002 | sorbin and SH3 domain containing 1                                                                         |
| SOS2             | -3.02 | -1.41 | 0.18  | 9.04E-05 | 0.0005 | SOS Ras/Rho guanine nucleotide exchange factor 2                                                           |
| SOST             | 3.26  | 0.32  | -1.38 | 0.0002   | 0.0010 | sclerostin                                                                                                 |
| SOX18            | -3.15 | -1.32 | 0.33  | 2.92E-05 | 0.0003 | SRY box 18                                                                                                 |
| SOX4             | 3.12  | 0.26  | -1.38 | 5.84E-06 | 0.0002 | SRY box 4                                                                                                  |
| SOX6             | -3.16 | -1.38 | 0.28  | 3.05E-05 | 0.0003 | SRY box 6                                                                                                  |
| SP8              | -3.17 | -1.38 | 0.28  | 1.49E-05 | 0.0002 | Sp8 transcription factor                                                                                   |
| SPAG6            | -3.09 | -1.28 | 0.35  | 1.43E-05 | 0.0002 | sperm associated antigen 6                                                                                 |
| SPAG7            | -3.03 | -1.31 | 0.29  | 6.29E-05 | 0.0004 | sperm associated antigen 7                                                                                 |
| SPAG8            | 3.15  | 0.45  | -1.2  | 1.53E-05 | 0.0002 | sperm associated antigen 8                                                                                 |
| SPANXB1          | 3.09  | 0.34  | -1.29 | 1.01E-05 | 0.0002 | SPANX family, member B1                                                                                    |
| SPANXB1          | 3.09  | 0.34  | -1.29 | 1.01E-05 | 0.0002 | SPANX family, member B1                                                                                    |
| SPATA16          | -3.1  | -1.39 | 0.24  | 4.56E-05 | 0.0003 | spermatogenesis associated 16                                                                              |

|                    |       |       |       |          |        |                                                                                                                                          |
|--------------------|-------|-------|-------|----------|--------|------------------------------------------------------------------------------------------------------------------------------------------|
| C1; SPATA31C2; SP  | 3.11  | 0.35  | -1.29 | 8.94E-06 | 0.0002 | SPATA31 subfamily C, member 1; SPATA31 subfamily C, member 2; SPATA31 subfamily A, member 1                                              |
| SPATA31D5P         | -3.2  | -1.33 | 0.35  | 4.91E-06 | 0.0002 | SPATA31 subfamily D, member 5, pseudogene                                                                                                |
| SPATA41            | -3.07 | -1.3  | 0.32  | 2.06E-05 | 0.0002 | spermatogenesis associated 41 (non-protein coding)                                                                                       |
| SPCS1              | 3.12  | 0.21  | -1.43 | 3.41E-05 | 0.0003 | signal peptidase complex subunit 1                                                                                                       |
| SPCS3              | -3.03 | -1.35 | 0.25  | 8.38E-06 | 0.0002 | signal peptidase complex subunit 3                                                                                                       |
| SPDEF              | 3.31  | 0.32  | -1.4  | 6.53E-05 | 0.0004 | SAM pointed domain containing ETS transcription factor                                                                                   |
| SPDYE3             | 3.37  | 0.32  | -1.43 | 2.68E-05 | 0.0003 | speedy/RINGO cell cycle regulator family member E3                                                                                       |
| SPECC1             | -3.01 | -1.28 | 0.31  | 3.47E-06 | 0.0002 | sperm antigen with calponin homology and coiled-coil domains 1                                                                           |
| SPEM1              | 3.18  | 0.28  | -1.39 | 7.66E-06 | 0.0002 | spermatid maturation 1                                                                                                                   |
| SPEN               | 3.19  | 0.47  | -1.2  | 4.02E-06 | 0.0002 | spen family transcriptional repressor                                                                                                    |
| SPHK1              | -3.06 | -1.33 | 0.28  | 1.80E-05 | 0.0002 | sphingosine kinase 1                                                                                                                     |
| SPIB               | 3.35  | 0.36  | -1.38 | 2.83E-05 | 0.0003 | Spi-B transcription factor (Spi-1/PU.1 related)                                                                                          |
| SPOCD1             | 3.26  | 0.32  | -1.38 | 2.18E-05 | 0.0002 | SPOC domain containing 1                                                                                                                 |
| SPRR2B             | -3.2  | -1.36 | 0.32  | 1.73E-05 | 0.0002 | small proline-rich protein 2B                                                                                                            |
| SPRR2D             | -3.16 | -1.38 | 0.28  | 5.74E-05 | 0.0004 | small proline-rich protein 2D                                                                                                            |
| SPTB               | 3.37  | 0.32  | -1.43 | 9.00E-06 | 0.0002 | spectrin, beta, erythrocytic                                                                                                             |
| SPTBN4             | 3.3   | 0.29  | -1.44 | 3.90E-06 | 0.0002 | spectrin, beta, non-erythrocytic 4                                                                                                       |
| SRBD1              | -3.11 | -1.31 | 0.32  | 8.85E-05 | 0.0005 | S1 RNA binding domain 1                                                                                                                  |
| SREBF1             | -3.01 | -1.31 | 0.28  | 1.19E-05 | 0.0002 | sterol regulatory element binding transcription factor 1                                                                                 |
| SRGAP3             | 3.26  | 0.41  | -1.29 | 3.59E-06 | 0.0002 | SLIT-ROBO Rho GTPase activating protein 3                                                                                                |
| SRP54              | -3.18 | -1.43 | 0.24  | 6.77E-05 | 0.0004 | signal recognition particle 54kDa                                                                                                        |
| SRSF4              | 3.61  | 0.45  | -1.4  | 3.14E-06 | 0.0002 | serine/arginine-rich splicing factor 4                                                                                                   |
| SSB                | -3.03 | -1.31 | 0.29  | 0.0009   | 0.0035 | Sjogren syndrome antigen B (autoantigen La)                                                                                              |
| SSH3               | -3.19 | -1.37 | 0.3   | 1.04E-05 | 0.0002 | slingshot protein phosphatase 3                                                                                                          |
| SSR4               | -3.15 | -1.28 | 0.38  | 1.00E-05 | 0.0002 | signal sequence receptor, delta                                                                                                          |
| SSTR1              | 3.1   | 0.43  | -1.2  | 0.0002   | 0.0009 | somatostatin receptor 1                                                                                                                  |
| 4B; SSX4; SSX2B; S | 3.36  | 0.35  | -1.4  | 3.70E-06 | 0.0002 | synovial sarcoma, X breakpoint 4B; synovial sarcoma, X breakpoint 4; synovial sarcoma, X breakpoint 2B; synovial sarcoma, X breakpoint 2 |
| 4B; SSX4; SSX2B; S | 3.46  | 0.35  | -1.44 | 8.26E-06 | 0.0002 | synovial sarcoma, X breakpoint 4B; synovial sarcoma, X breakpoint 4; synovial sarcoma, X breakpoint 2B; synovial sarcoma, X breakpoint 2 |
| ST5                | 3.42  | 0.39  | -1.38 | 7.28E-06 | 0.0002 | suppression of tumorigenicity 5                                                                                                          |
| ST6GAL1            | -3.01 | -1.31 | 0.28  | 0.0001   | 0.0006 | ST6 beta-galactosamide alpha-2,6-sialyltransferase 1                                                                                     |
| ST6GAL2            | 3.28  | 0.33  | -1.38 | 8.31E-06 | 0.0002 | ST6 beta-galactosamide alpha-2,6-sialyltransferase 2                                                                                     |
| STAC3; R3HDM2      | -3.19 | -1.38 | 0.29  | 1.73E-05 | 0.0002 | SH3 and cysteine rich domain 3; R3H domain containing 2                                                                                  |
| STAR               | -3    | -1.32 | 0.26  | 5.00E-06 | 0.0002 | steroidogenic acute regulatory protein                                                                                                   |
| STAT3              | 3.36  | 0.34  | -1.4  | 1.80E-05 | 0.0002 | signal transducer and activator of transcription 3 (acute-phase response factor)                                                         |
| STAU1              | -3.2  | -1.31 | 0.36  | 3.70E-05 | 0.0003 | staufer double-stranded RNA binding protein 1                                                                                            |
| STEAP1B            | 3.52  | 0.43  | -1.38 | 5.12E-06 | 0.0002 | STEAP family member 1B                                                                                                                   |
| STGC3              | 3.37  | 0.32  | -1.43 | 9.00E-06 | 0.0002 | uncharacterized STGC3                                                                                                                    |
| STIM1              | 3.21  | 0.39  | -1.29 | 0.0002   | 0.0010 | stromal interaction molecule 1                                                                                                           |

[illegible]

|                    |       |       |       |          |        |                                                                                         |
|--------------------|-------|-------|-------|----------|--------|-----------------------------------------------------------------------------------------|
| TBX2               | 3.34  | 0.36  | -1.38 | 1.48E-05 | 0.0002 | T-box 2                                                                                 |
| TBX4               | -3.06 | -1.33 | 0.28  | 9.17E-06 | 0.0002 | T-box 4                                                                                 |
| TCEAL8             | -3.09 | -1.28 | 0.35  | 9.84E-06 | 0.0002 | transcription elongation factor A (SII)-like 8                                          |
| TCEB1              | -3.06 | -1.33 | 0.28  | 4.58E-05 | 0.0003 | transcription elongation factor B (SIII), polypeptide 1 (15kDa, elongin C)              |
| TCF20              | -3.15 | -1.32 | 0.33  | 2.80E-05 | 0.0003 | transcription factor 20 (AR1)                                                           |
| TCF7               | 3.13  | 0.36  | -1.29 | 4.50E-05 | 0.0003 | transcription factor 7 (T-cell specific, HMG-box)                                       |
| TCHH               | 3.23  | 0.3   | -1.39 | 4.17E-06 | 0.0002 | trichohyalin                                                                            |
| TCTEX1D4           | 3.26  | 0.32  | -1.38 | 2.18E-05 | 0.0002 | Tctex1 domain containing 4                                                              |
| TDG                | -3.28 | -1.28 | 0.44  | 0.0002   | 0.0009 | thymine DNA glycosylase                                                                 |
| TEKT4              | 3.06  | 0.41  | -1.2  | 2.29E-05 | 0.0002 | tektin 4                                                                                |
| TEKT4P2            | -3.38 | -1.36 | 0.39  | 0.0001   | 0.0006 | tektin 4 pseudogene 2                                                                   |
| TEKT4P2; MAFIP     | -3.32 | -1.41 | 0.32  | 0.0002   | 0.0007 | tektin 4 pseudogene 2; MAFF interacting protein (pseudogene)                            |
| TENM2              | 3.29  | 0.32  | -1.4  | 1.27E-05 | 0.0002 | teneurin transmembrane protein 2                                                        |
| TESC               | 3.18  | 0.38  | -1.29 | 7.61E-06 | 0.0002 | tescalcin                                                                               |
| TET1               | 3.18  | 0.38  | -1.29 | 3.69E-05 | 0.0003 | tet methylcytosine dioxygenase 1                                                        |
| TET2               | -3.16 | -1.38 | 0.28  | 3.42E-06 | 0.0002 | tet methylcytosine dioxygenase 2                                                        |
| TEX19              | 3.26  | 0.32  | -1.38 | 3.43E-06 | 0.0002 | testis expressed 19                                                                     |
| TEX26              | -3.07 | -1.34 | 0.28  | 1.68E-05 | 0.0002 | testis expressed 26                                                                     |
| TEX261             | -3.08 | -1.31 | 0.31  | 4.12E-06 | 0.0002 | testis expressed 261                                                                    |
| :28; TEX28P2; TEX2 | 3.12  | 0.35  | -1.29 | 4.67E-05 | 0.0003 | testis expressed 28; testis expressed 28 pseudogene 2; testis expressed 28 pseudogene 1 |
| :28; TEX28P2; TEX2 | 3.12  | 0.35  | -1.29 | 4.67E-05 | 0.0003 | testis expressed 28; testis expressed 28 pseudogene 2; testis expressed 28 pseudogene 1 |
| TFAM               | 3.26  | 0.32  | -1.38 | 0.0001   | 0.0005 | transcription factor A, mitochondrial                                                   |
| TFAP4              | 3.43  | 0.36  | -1.42 | 5.19E-05 | 0.0004 | transcription factor AP-4 (activating enhancer binding protein 4)                       |
| TFDP1              | -3.13 | -1.33 | 0.32  | 2.67E-05 | 0.0003 | transcription factor Dp-1                                                               |
| TFDP2              | 3.22  | 0.26  | -1.43 | 2.85E-05 | 0.0003 | transcription factor Dp-2 (E2F dimerization partner 2)                                  |
| TFR2               | 3.14  | 0.21  | -1.44 | 2.83E-05 | 0.0003 | transferrin receptor 2                                                                  |
| TGFB3              | 3.08  | 0.23  | -1.39 | 3.50E-05 | 0.0003 | transforming growth factor beta 3                                                       |
| TGM5               | 3.29  | 0.3   | -1.41 | 3.53E-05 | 0.0003 | transglutaminase 5                                                                      |
| THAP2              | 3.53  | 0.38  | -1.44 | 1.26E-05 | 0.0002 | THAP domain containing, apoptosis associated protein 2                                  |
| THOC3              | -3.14 | -1.3  | 0.36  | 8.23E-06 | 0.0002 | THO complex 3                                                                           |
| THOC3              | -3.09 | -1.28 | 0.35  | 1.00E-05 | 0.0002 | THO complex 3                                                                           |
| THOC6              | -3.06 | -1.33 | 0.28  | 4.23E-06 | 0.0002 | THO complex 6                                                                           |
| THRA; NR1D1        | -3    | -1.31 | 0.27  | 4.79E-06 | 0.0002 | thyroid hormone receptor, alpha; nuclear receptor subfamily 1, group D, member 1        |
| THTPA              | -3.46 | -1.31 | 0.48  | 3.70E-05 | 0.0003 | thiamine triphosphatase                                                                 |
| TIGD5              | -3.19 | -1.3  | 0.38  | 1.63E-05 | 0.0002 | tigger transposable element derived 5                                                   |
| TIMM10B            | -3.12 | -1.36 | 0.28  | 3.66E-05 | 0.0003 | translocase of inner mitochondrial membrane 10 homolog B (yeast)                        |
| TIMP2; CEP295NL    | 3.37  | 0.31  | -1.44 | 1.31E-05 | 0.0002 | TIMP metalloproteinase inhibitor 2; CEP295 N-terminal like                              |
| TIRAP              | -3.38 | -1.36 | 0.4   | 2.60E-05 | 0.0003 | toll-interleukin 1 receptor (TIR) domain containing adaptor protein                     |

|                            |       |       |       |          |        |                                                                                                           |
|----------------------------|-------|-------|-------|----------|--------|-----------------------------------------------------------------------------------------------------------|
| TISP43; LOC646743          | -3.5  | -1.38 | 0.43  | 0.0002   | 0.0009 | uncharacterized LOC150527; uncharacterized LOC646743                                                      |
| TISP43; LOC646743          | -3.5  | -1.38 | 0.43  | 0.0002   | 0.0009 | uncharacterized LOC150527; uncharacterized LOC646743                                                      |
| TJP2                       | 3.25  | 0.32  | -1.38 | 9.28E-06 | 0.0002 | tight junction protein 2                                                                                  |
| TLDC2                      | -3.52 | -1.37 | 0.44  | 4.39E-05 | 0.0003 | TBC/LysM-associated domain containing 2                                                                   |
| TLR8                       | -3.11 | -1.38 | 0.25  | 3.70E-05 | 0.0003 | toll-like receptor 8                                                                                      |
| TM7SF2                     | -3.12 | -1.36 | 0.28  | 5.86E-06 | 0.0002 | transmembrane 7 superfamily member 2                                                                      |
| TM9SF3                     | -3.01 | -1.31 | 0.28  | 4.50E-05 | 0.0003 | transmembrane 9 superfamily member 3                                                                      |
| TMED1                      | 3.19  | 0.47  | -1.2  | 1.65E-05 | 0.0002 | transmembrane p24 trafficking protein 1                                                                   |
| TMEM104                    | 3.22  | 0.26  | -1.43 | 8.24E-06 | 0.0002 | transmembrane protein 104                                                                                 |
| TMEM109                    | -3.01 | -1.31 | 0.28  | 1.28E-05 | 0.0002 | transmembrane protein 109                                                                                 |
| TMEM11                     | 3.48  | 0.4   | -1.4  | 3.34E-05 | 0.0003 | transmembrane protein 11                                                                                  |
| TMEM110; MUSTN1; TMEM110   | -3.03 | -1.28 | 0.32  | 3.56E-06 | 0.0002 | TMEM110-MUSTN1 readthrough; transmembrane protein 110                                                     |
| TMEM120A                   | -3.05 | -1.35 | 0.26  | 2.63E-05 | 0.0003 | transmembrane protein 120A                                                                                |
| TMEM134                    | -3.04 | -1.28 | 0.32  | 1.11E-05 | 0.0002 | transmembrane protein 134                                                                                 |
| TMEM136                    | -3.17 | -1.36 | 0.3   | 5.72E-05 | 0.0004 | transmembrane protein 136                                                                                 |
| TMEM14EP                   | -3.07 | -1.38 | 0.24  | 7.28E-05 | 0.0004 | transmembrane protein 14E, pseudogene                                                                     |
| TMEM151A                   | -3.14 | -1.28 | 0.37  | 4.06E-05 | 0.0003 | transmembrane protein 151A                                                                                |
| TMEM17                     | -3.03 | -1.32 | 0.28  | 3.61E-06 | 0.0002 | transmembrane protein 17                                                                                  |
| TMEM174                    | -3.01 | -1.3  | 0.29  | 4.16E-06 | 0.0002 | transmembrane protein 174                                                                                 |
| TMEM175                    | -3.09 | -1.36 | 0.26  | 1.82E-05 | 0.0002 | transmembrane protein 175                                                                                 |
| TMEM18                     | 3.02  | 0.39  | -1.2  | 6.10E-05 | 0.0004 | transmembrane protein 18                                                                                  |
| TMEM199                    | 3.47  | 0.39  | -1.4  | 6.94E-06 | 0.0002 | transmembrane protein 199                                                                                 |
| TMEM200B                   | 3.1   | 0.43  | -1.2  | 1.41E-05 | 0.0002 | transmembrane protein 200B                                                                                |
| TMEM217                    | -3.02 | -1.36 | 0.23  | 3.09E-05 | 0.0003 | transmembrane protein 217                                                                                 |
| TMEM221                    | -3.03 | -1.28 | 0.32  | 1.07E-05 | 0.0002 | transmembrane protein 221                                                                                 |
| TMEM266                    | -3.09 | -1.28 | 0.35  | 5.30E-05 | 0.0004 | transmembrane protein 266                                                                                 |
| TMEM41A                    | -3.14 | -1.35 | 0.3   | 1.34E-05 | 0.0002 | transmembrane protein 41A                                                                                 |
| TMEM55B                    | -3.07 | -1.34 | 0.28  | 3.65E-05 | 0.0003 | transmembrane protein 55B                                                                                 |
| TMEM61                     | 3.02  | 0.39  | -1.2  | 7.80E-05 | 0.0005 | transmembrane protein 61                                                                                  |
| TMEM62                     | -3.03 | -1.31 | 0.29  | 4.66E-06 | 0.0002 | transmembrane protein 62                                                                                  |
| TMEM88                     | 3.34  | 0.44  | -1.3  | 3.63E-06 | 0.0002 | transmembrane protein 88                                                                                  |
| TMEM97                     | 3.09  | 0.23  | -1.4  | 9.80E-06 | 0.0002 | transmembrane protein 97                                                                                  |
| TMOD4; VPS72               | -3.07 | -1.28 | 0.34  | 2.81E-05 | 0.0003 | tropomodulin 4 (muscle); vacuolar protein sorting 72 homolog (S. cerevisiae)                              |
| TMPRSS13                   | -3.09 | -1.36 | 0.26  | 1.18E-05 | 0.0002 | transmembrane protease, serine 13                                                                         |
| TMPRSS5                    | -3.06 | -1.33 | 0.28  | 5.43E-06 | 0.0002 | transmembrane protease, serine 5                                                                          |
| TMPRSS7                    | -3.04 | -1.38 | 0.22  | 1.10E-05 | 0.0002 | transmembrane protease, serine 7                                                                          |
| TXNPYX; TMSB4X; TMSB4X-AS1 | 3.3   | 0.32  | -1.4  | 3.06E-06 | 0.0002 | thymosin beta 4, X-linked pseudogene 6; thymosin beta 4, X-linked; thymosin beta 4, X-linked pseudogene 4 |
| TMUB1                      | 3.26  | 0.32  | -1.38 | 1.55E-05 | 0.0002 | transmembrane and ubiquitin-like domain containing 1                                                      |



|                  |       |       |       |          |        |                                                                                                                                     |
|------------------|-------|-------|-------|----------|--------|-------------------------------------------------------------------------------------------------------------------------------------|
| TNFAIP3          | -3.1  | -1.38 | 0.25  | 9.99E-06 | 0.0002 | tumor necrosis factor, alpha-induced protein 3                                                                                      |
| TNFRSF10C        | -3.03 | -1.28 | 0.32  | 1.34E-05 | 0.0002 | tumor necrosis factor receptor superfamily, member 10c, decoy without an intracellular domain                                       |
| TNFRSF21         | 3.19  | 0.27  | -1.4  | 6.62E-06 | 0.0002 | tumor necrosis factor receptor superfamily, member 21                                                                               |
| TNFSF4           | -3.07 | -1.31 | 0.31  | 3.66E-06 | 0.0002 | tumor necrosis factor (ligand) superfamily, member 4                                                                                |
| TNIP1            | 3.44  | 0.38  | -1.4  | 4.19E-05 | 0.0003 | TNFAIP3 interacting protein 1                                                                                                       |
| TNK2-AS1         | 3.38  | 0.44  | -1.31 | 3.40E-05 | 0.0003 | TNK2 antisense RNA 1                                                                                                                |
| TNNC2            | 3.11  | 0.35  | -1.29 | 1.29E-05 | 0.0002 | troponin C type 2 (fast)                                                                                                            |
| TNNI2            | 3.05  | 0.41  | -1.2  | 1.88E-05 | 0.0002 | troponin I type 2 (skeletal, fast)                                                                                                  |
| TNPO1            | 3.66  | 0.48  | -1.39 | 3.69E-06 | 0.0002 | transportin 1                                                                                                                       |
| TOB1             | 3.49  | 0.41  | -1.39 | 7.46E-06 | 0.0002 | transducer of ERBB2, 1                                                                                                              |
| TOM1L1           | -3.08 | -1.32 | 0.3   | 9.99E-06 | 0.0002 | target of myb1 like 1 membrane trafficking protein                                                                                  |
| TOMM5; FBXO10    | 3.26  | 0.32  | -1.38 | 2.68E-06 | 0.0002 | translocase of outer mitochondrial membrane 5 homolog (yeast); F-box protein 10                                                     |
| TOMM6; PRICKLE4  | -3.24 | -1.28 | 0.42  | 5.10E-05 | 0.0003 | translocase of outer mitochondrial membrane 6 homolog (yeast); prickles homolog 4                                                   |
| TOMM70A          | -3.16 | -1.38 | 0.28  | 3.36E-05 | 0.0003 | translocase of outer mitochondrial membrane 70 homolog A (S. cerevisiae)                                                            |
| TONSL            | -3.23 | -1.41 | 0.28  | 4.12E-05 | 0.0003 | tonsoku-like, DNA repair protein                                                                                                    |
| TOPAZ1           | -3.2  | -1.31 | 0.36  | 7.59E-06 | 0.0002 | testis and ovary specific PAZ domain containing 1                                                                                   |
| TOX3             | -3.1  | -1.32 | 0.31  | 2.48E-05 | 0.0002 | TOX high mobility group box family member 3                                                                                         |
| TP53TG1          | 3.4   | 0.32  | -1.44 | 1.63E-05 | 0.0002 | TP53 target 1 (non-protein coding)                                                                                                  |
| TP73-AS1         | -3.01 | -1.31 | 0.28  | 7.90E-06 | 0.0002 | TP73 antisense RNA 1                                                                                                                |
| TPGS2            | 3.29  | 0.43  | -1.29 | 1.62E-05 | 0.0002 | tubulin polyglutamylase complex subunit 2                                                                                           |
| TPH2             | -3.05 | -1.28 | 0.33  | 6.93E-06 | 0.0002 | tryptophan hydroxylase 2                                                                                                            |
| TPM4             | -3.17 | -1.28 | 0.39  | 0.0005   | 0.0019 | tropomyosin 4                                                                                                                       |
| TPRG1L           | 3.48  | 0.36  | -1.44 | 3.64E-05 | 0.0003 | tumor protein p63 regulated 1-like                                                                                                  |
| TPTE             | -3.12 | -1.36 | 0.28  | 1.21E-05 | 0.0002 | transmembrane phosphatase with tensin homology                                                                                      |
| TRABD2B          | 3.26  | 0.32  | -1.38 | 3.18E-05 | 0.0003 | TraB domain containing 2B                                                                                                           |
| TRAK1            | 3.16  | 0.23  | -1.43 | 2.56E-05 | 0.0003 | trafficking protein, kinesin binding 1                                                                                              |
| TRANK1           | -3.02 | -1.33 | 0.26  | 2.44E-05 | 0.0002 | tetratricopeptide repeat and ankyrin repeat containing 1                                                                            |
| TRIB3            | -3.1  | -1.3  | 0.34  | 8.83E-05 | 0.0005 | tribbles pseudokinase 3                                                                                                             |
| TRIM24           | 3.3   | 0.32  | -1.4  | 3.06E-05 | 0.0003 | tripartite motif containing 24                                                                                                      |
| TRIM29           | -3.03 | -1.3  | 0.3   | 3.88E-05 | 0.0003 | tripartite motif containing 29                                                                                                      |
| TRIM31           | 3.37  | 0.32  | -1.43 | 7.19E-06 | 0.0002 | tripartite motif containing 31                                                                                                      |
| TRIM40           | -3.04 | -1.28 | 0.32  | 7.67E-06 | 0.0002 | tripartite motif containing 40                                                                                                      |
| TRIM42           | 3.1   | 0.43  | -1.2  | 9.30E-06 | 0.0002 | tripartite motif containing 42                                                                                                      |
| TRIM52           | -3.18 | -1.32 | 0.35  | 3.13E-05 | 0.0003 | tripartite motif containing 52                                                                                                      |
| V6-TRIM34; TRIM3 | -3.01 | -1.31 | 0.28  | 2.69E-05 | 0.0003 | tripartite motif containing 6; TRIM6-TRIM34 readthrough; tripartite motif containing 34; tripartite motif containing 78, pseudogene |
| TRIM66           | 3.31  | 0.34  | -1.39 | 3.07E-06 | 0.0002 | tripartite motif containing 66                                                                                                      |
| TRIM9            | 3.04  | 0.4   | -1.2  | 8.30E-06 | 0.0002 | tripartite motif containing 9                                                                                                       |
| TRIML2           | -3.02 | -1.38 | 0.21  | 4.09E-05 | 0.0003 | tripartite motif family like 2                                                                                                      |

|              |       |       |       |          |        |                                                                    |
|--------------|-------|-------|-------|----------|--------|--------------------------------------------------------------------|
| TRPV2        | -3.08 | -1.38 | 0.24  | 4.92E-05 | 0.0003 | transient receptor potential cation channel, subfamily V, member 2 |
| TSC1         | -3.03 | -1.32 | 0.28  | 4.39E-06 | 0.0002 | tuberous sclerosis 1                                               |
| TSC22D2      | 3.09  | 0.21  | -1.42 | 2.64E-05 | 0.0003 | TSC22 domain family, member 2                                      |
| TSEN15       | -3.05 | -1.37 | 0.24  | 5.03E-05 | 0.0003 | TSEN15 tRNA splicing endonuclease subunit                          |
| TSPAN1       | -3.1  | -1.38 | 0.25  | 1.41E-05 | 0.0002 | tetraspanin 1                                                      |
| TSPAN2       | -3.12 | -1.36 | 0.28  | 0.0001   | 0.0007 | tetraspanin 2                                                      |
| TSPAN33      | -3.01 | -1.31 | 0.28  | 3.24E-05 | 0.0003 | tetraspanin 33                                                     |
| TSPAN4       | -3.16 | -1.34 | 0.32  | 0.0001   | 0.0006 | tetraspanin 4                                                      |
| TSPAN5       | -3.11 | -1.36 | 0.27  | 5.58E-05 | 0.0004 | tetraspanin 5                                                      |
| TSSK6        | -3.03 | -1.31 | 0.29  | 1.19E-05 | 0.0002 | testis-specific serine kinase 6                                    |
| TST          | -3.36 | -1.35 | 0.4   | 0.0004   | 0.0016 | thiosulfate sulfurtransferase (rhodanese)                          |
| TTC7A        | 3.3   | 0.31  | -1.41 | 4.89E-05 | 0.0003 | tetratricopeptide repeat domain 7A                                 |
| TTC9         | 3.04  | 0.4   | -1.2  | 0.0002   | 0.0007 | tetratricopeptide repeat domain 9                                  |
| TUBA1C       | -3.09 | -1.28 | 0.35  | 0.0001   | 0.0006 | tubulin, alpha 1c                                                  |
| TUBA8; PEX26 | -3.14 | -1.31 | 0.34  | 8.11E-06 | 0.0002 | tubulin, alpha 8; peroxisomal biogenesis factor 26                 |
| TUBB2A       | 3.41  | 0.32  | -1.44 | 3.53E-06 | 0.0002 | tubulin, beta 2A class IIa                                         |
| TUBGCP2      | -3.21 | -1.41 | 0.27  | 1.60E-05 | 0.0002 | tubulin, gamma complex associated protein 2                        |
| TULP1        | 3.36  | 0.36  | -1.39 | 4.09E-06 | 0.0002 | tubby like protein 1                                               |
| TVP23A       | -3.06 | -1.33 | 0.28  | 7.53E-06 | 0.0002 | trans-golgi network vesicle protein 23 homolog A (S. cerevisiae)   |
| TWIST1       | 3.32  | 0.43  | -1.3  | 9.05E-05 | 0.0005 | twist family bHLH transcription factor 1                           |
| TYW1B        | 3.26  | 0.32  | -1.38 | 9.04E-05 | 0.0005 | tRNA-yW synthesizing protein 1 homolog B (S. cerevisiae)           |
| U2AF2        | -3.07 | -1.28 | 0.34  | 1.48E-05 | 0.0002 | U2 small nuclear RNA auxiliary factor 2                            |
| UAP1         | 3.53  | 0.39  | -1.43 | 1.05E-05 | 0.0002 | UDP-N-acetylglucosamine pyrophosphorylase 1                        |
| UBA5         | -3.13 | -1.28 | 0.36  | 1.07E-05 | 0.0002 | ubiquitin-like modifier activating enzyme 5                        |
| UBBP4        | -3.37 | -1.43 | 0.32  | 4.46E-05 | 0.0003 | ubiquitin B pseudogene 4                                           |
| UBE2D4       | -3.11 | -1.31 | 0.32  | 2.32E-05 | 0.0002 | ubiquitin-conjugating enzyme E2D 4 (putative)                      |
| UBE2DNL      | -3.21 | -1.28 | 0.4   | 6.59E-05 | 0.0004 | ubiquitin conjugating enzyme E2D N-terminal like (pseudogene)      |
| UBE2E4P      | -3.2  | -1.31 | 0.36  | 5.55E-05 | 0.0004 | ubiquitin-conjugating enzyme E2E 4 pseudogene                      |
| UBE2G2       | 3.37  | 0.32  | -1.43 | 5.51E-05 | 0.0004 | ubiquitin conjugating enzyme E2G 2                                 |
| UBE2H        | 3.75  | 0.47  | -1.44 | 2.93E-06 | 0.0002 | ubiquitin conjugating enzyme E2H                                   |
| UBE2W        | -3.16 | -1.36 | 0.3   | 9.34E-05 | 0.0005 | ubiquitin-conjugating enzyme E2W (putative)                        |
| UBE2Z        | -3.16 | -1.38 | 0.28  | 5.64E-05 | 0.0004 | ubiquitin-conjugating enzyme E2Z                                   |
| UBIAD1       | -3.04 | -1.28 | 0.33  | 5.61E-05 | 0.0004 | UbiA prenyltransferase domain containing 1                         |
| UBL3         | -3.43 | -1.41 | 0.36  | 0.0001   | 0.0006 | ubiquitin-like 3                                                   |
| UBL7         | -3.13 | -1.36 | 0.28  | 5.52E-05 | 0.0004 | ubiquitin-like 7                                                   |
| UCN3         | 3.41  | 0.32  | -1.44 | 9.86E-06 | 0.0002 | urocortin 3                                                        |
| UFSP1        | -3.29 | -1.31 | 0.4   | 1.48E-05 | 0.0002 | UFM1-specific peptidase 1 (inactive)                               |
| UHRF1        | 3.13  | 0.44  | -1.2  | 5.84E-05 | 0.0004 | ubiquitin-like with PHD and ring finger domains 1                  |

|                |       |       |       |          |        |                                                                             |
|----------------|-------|-------|-------|----------|--------|-----------------------------------------------------------------------------|
| ULK1           | 3.34  | 0.33  | -1.41 | 2.65E-05 | 0.0003 | unc-51 like autophagy activating kinase 1                                   |
| UMODL1         | 3.12  | 0.26  | -1.38 | 5.04E-06 | 0.0002 | uromodulin-like 1                                                           |
| UNC45A         | -3.21 | -1.33 | 0.35  | 5.35E-06 | 0.0002 | unc-45 myosin chaperone A                                                   |
| UNC80          | 3.1   | 0.25  | -1.38 | 5.87E-05 | 0.0004 | unc-80 homolog (C. elegans)                                                 |
| UNK            | -3.06 | -1.28 | 0.34  | 7.00E-05 | 0.0004 | unkempt family zinc finger                                                  |
| UPK2           | -3.01 | -1.31 | 0.28  | 4.44E-06 | 0.0002 | uroplakin 2                                                                 |
| UPP2           | -3.06 | -1.36 | 0.25  | 4.20E-06 | 0.0002 | uridine phosphorylase 2                                                     |
| UQCC2          | -3.14 | -1.35 | 0.3   | 6.97E-06 | 0.0002 | ubiquinol-cytochrome c reductase complex assembly factor 2                  |
| URAD           | -3.23 | -1.41 | 0.28  | 0.0001   | 0.0006 | ureidoimidazoline (2-oxo-4-hydroxy-4-carboxy-5-) decarboxylase              |
| UROD           | -3.1  | -1.33 | 0.3   | 4.63E-05 | 0.0003 | uroporphyrinogen decarboxylase                                              |
| USMG5; MIR1307 | -3.17 | -1.33 | 0.33  | 2.36E-05 | 0.0002 | up-regulated during skeletal muscle growth 5 homolog (mouse); microRNA 1307 |
| USP21          | 3.3   | 0.32  | -1.4  | 3.89E-06 | 0.0002 | ubiquitin specific peptidase 21                                             |
| USP22          | 3.01  | 0.3   | -1.29 | 8.23E-06 | 0.0002 | ubiquitin specific peptidase 22                                             |
| USP27X         | 3.35  | 0.32  | -1.42 | 1.15E-05 | 0.0002 | ubiquitin specific peptidase 27, X-linked                                   |
| UST            | -3.01 | -1.31 | 0.28  | 6.59E-06 | 0.0002 | uronyl-2-sulfotransferase                                                   |
| UTS2R          | -3.24 | -1.31 | 0.39  | 1.54E-05 | 0.0002 | urotensin 2 receptor                                                        |
| VANGL1         | -3.05 | -1.34 | 0.27  | 3.99E-06 | 0.0002 | VANGL planar cell polarity protein 1                                        |
| VANGL2         | 3.42  | 0.39  | -1.38 | 4.42E-05 | 0.0003 | VANGL planar cell polarity protein 2                                        |
| VASN           | -3.04 | -1.28 | 0.32  | 2.88E-05 | 0.0003 | vasorin                                                                     |
| VAV1           | 3.06  | 0.41  | -1.2  | 2.57E-05 | 0.0003 | vav 1 guanine nucleotide exchange factor                                    |
| VCPIP1         | -3.09 | -1.35 | 0.28  | 5.80E-05 | 0.0004 | valosin containing protein (p97)/p47 complex interacting protein 1          |
| VEGFA          | 3.57  | 0.43  | -1.4  | 3.30E-05 | 0.0003 | vascular endothelial growth factor A                                        |
| VGLL3          | -3.09 | -1.35 | 0.28  | 9.49E-05 | 0.0005 | vestigial-like family member 3                                              |
| VNN1           | 3.21  | 0.39  | -1.29 | 1.01E-05 | 0.0002 | vanin 1                                                                     |
| VPS51          | 3.05  | 0.32  | -1.29 | 1.74E-05 | 0.0002 | vacuolar protein sorting 51 homolog (S. cerevisiae)                         |
| VPS53          | -3.13 | -1.38 | 0.26  | 9.47E-06 | 0.0002 | vacuolar protein sorting 53 homolog (S. cerevisiae)                         |
| VRK3           | 3.19  | 0.47  | -1.2  | 7.24E-06 | 0.0002 | vaccinia related kinase 3                                                   |
| VTRNA1-1       | -3.01 | -1.36 | 0.23  | 3.95E-05 | 0.0003 | vault RNA 1-1                                                               |
| VWF            | -3.01 | -1.31 | 0.28  | 1.98E-05 | 0.0002 | von Willebrand factor                                                       |
| WBP2NL         | 3.26  | 0.32  | -1.38 | 7.27E-06 | 0.0002 | WBP2 N-terminal like                                                        |
| WDPCP          | 3.37  | 0.32  | -1.43 | 3.11E-06 | 0.0002 | WD repeat containing planar cell polarity effector                          |
| WDR13          | -3.11 | -1.31 | 0.32  | 1.23E-05 | 0.0002 | WD repeat domain 13                                                         |
| WDR36          | 3.3   | 0.32  | -1.4  | 3.06E-05 | 0.0003 | WD repeat domain 36                                                         |
| WDR45          | -3.07 | -1.32 | 0.29  | 3.88E-05 | 0.0003 | WD repeat domain 45                                                         |
| WDR86          | 3.02  | 0.39  | -1.2  | 6.54E-06 | 0.0002 | WD repeat domain 86                                                         |
| WDR86          | 3.19  | 0.29  | -1.38 | 9.78E-05 | 0.0005 | WD repeat domain 86                                                         |
| WDR91          | -3.11 | -1.31 | 0.32  | 1.15E-05 | 0.0002 | WD repeat domain 91                                                         |
| WDR97          | -3.07 | -1.3  | 0.32  | 5.58E-06 | 0.0002 | WD repeat domain 97                                                         |

|                |       |       |       |          |        |                                                                                          |
|----------------|-------|-------|-------|----------|--------|------------------------------------------------------------------------------------------|
| WFIKKN1        | 3.42  | 0.39  | -1.38 | 4.40E-06 | 0.0002 | WAP, follistatin/kazal, immunoglobulin, kunitz and netrin domain containing 1            |
| WHAMMP3        | -3.22 | -1.36 | 0.33  | 3.52E-05 | 0.0003 | WAS protein homolog associated with actin, golgi membranes and microtubules pseudogene 3 |
| WIP1           | -3.08 | -1.37 | 0.25  | 3.15E-05 | 0.0003 | WD repeat domain, phosphoinositide interacting 1                                         |
| WNK2           | 3.06  | 0.32  | -1.29 | 5.59E-06 | 0.0002 | WNK lysine deficient protein kinase 2                                                    |
| WNK4           | -3.24 | -1.37 | 0.32  | 2.29E-05 | 0.0002 | WNK lysine deficient protein kinase 4                                                    |
| WNT16          | -3.06 | -1.28 | 0.33  | 6.40E-05 | 0.0004 | wingless-type MMTV integration site family, member 16                                    |
| WT1            | -3.15 | -1.33 | 0.32  | 8.10E-06 | 0.0002 | Wilms tumor 1                                                                            |
| WWOX           | 3.11  | 0.34  | -1.29 | 1.23E-05 | 0.0002 | WW domain containing oxidoreductase                                                      |
| XIRP1          | -3.05 | -1.34 | 0.27  | 0.0004   | 0.0016 | xin actin binding repeat containing 1                                                    |
| XPA            | -3.15 | -1.31 | 0.34  | 4.50E-05 | 0.0003 | xeroderma pigmentosum, complementation group A                                           |
| XPO4           | -3.17 | -1.37 | 0.29  | 2.53E-05 | 0.0003 | exportin 4                                                                               |
| XPO7           | -3.27 | -1.43 | 0.28  | 0.0002   | 0.0007 | exportin 7                                                                               |
| XRR1           | -3.09 | -1.35 | 0.28  | 0.0001   | 0.0007 | X-ray radiation resistance associated 1                                                  |
| YBX1           | -3.18 | -1.28 | 0.39  | 5.45E-05 | 0.0004 | Y box binding protein 1                                                                  |
| YIPF1          | -3.16 | -1.38 | 0.28  | 3.83E-05 | 0.0003 | Yip1 domain family member 1                                                              |
| YWHAG          | -3.1  | -1.37 | 0.26  | 3.20E-05 | 0.0003 | tyrosine 3-monooxygenase/tryptophan 5-monooxygenase activation protein, gamma            |
| ZAP70          | 3.26  | 0.32  | -1.38 | 4.40E-06 | 0.0002 | zeta chain of T cell receptor associated protein kinase 70kDa                            |
| ZAR1           | 3.15  | 0.27  | -1.38 | 3.63E-06 | 0.0002 | zygote arrest 1                                                                          |
| ZBED6; ZC3H11A | -3.31 | -1.36 | 0.36  | 7.58E-06 | 0.0002 | zinc finger, BED-type containing 6; zinc finger CCCH-type containing 11A                 |
| ZBTB10         | 3.15  | 0.45  | -1.2  | 1.11E-05 | 0.0002 | zinc finger and BTB domain containing 10                                                 |
| ZBTB34         | 3.3   | 0.32  | -1.4  | 8.63E-06 | 0.0002 | zinc finger and BTB domain containing 34                                                 |
| ZBTB6          | -3.17 | -1.36 | 0.3   | 6.02E-06 | 0.0002 | zinc finger and BTB domain containing 6                                                  |
| ZBTB7C         | 3.73  | 0.5   | -1.4  | 4.54E-06 | 0.0002 | zinc finger and BTB domain containing 7C                                                 |
| ZBTB9; SYNGAP1 | -3.13 | -1.28 | 0.36  | 5.03E-06 | 0.0002 | zinc finger and BTB domain containing 9; synaptic Ras GTPase activating protein 1        |
| ZCCHC12        | -3.29 | -1.32 | 0.4   | 5.79E-06 | 0.0002 | zinc finger, CCHC domain containing 12                                                   |
| ZCCHC16        | -3.01 | -1.31 | 0.28  | 2.80E-05 | 0.0003 | zinc finger, CCHC domain containing 16                                                   |
| ZCCHC24        | -3.03 | -1.32 | 0.27  | 1.52E-05 | 0.0002 | zinc finger, CCHC domain containing 24                                                   |
| ZCCHC3         | 3.29  | 0.32  | -1.4  | 1.57E-05 | 0.0002 | zinc finger, CCHC domain containing 3                                                    |
| ZDHHC1         | -3.05 | -1.36 | 0.25  | 7.73E-05 | 0.0005 | zinc finger, DHHC-type containing 1                                                      |
| ZDHHC14        | -3.17 | -1.31 | 0.35  | 1.15E-05 | 0.0002 | zinc finger, DHHC-type containing 14                                                     |
| ZER1           | 3.23  | 0.29  | -1.4  | 3.51E-06 | 0.0002 | zyg-11 related, cell cycle regulator                                                     |
| ZFP90          | -3.11 | -1.36 | 0.28  | 1.14E-05 | 0.0002 | ZFP90 zinc finger protein                                                                |
| ZG16B          | -3.18 | -1.35 | 0.32  | 6.29E-05 | 0.0004 | zymogen granule protein 16B                                                              |
| ZIK1           | 3.45  | 0.4   | -1.38 | 2.59E-05 | 0.0003 | zinc finger protein interacting with K protein 1                                         |
| ZKSCAN1        | -3.04 | -1.28 | 0.32  | 9.53E-05 | 0.0005 | zinc finger with KRAB and SCAN domains 1                                                 |
| ZKSCAN7        | -3.3  | -1.38 | 0.34  | 0.0001   | 0.0006 | zinc finger with KRAB and SCAN domains 7                                                 |
| ZMAT1          | 3.42  | 0.39  | -1.38 | 9.09E-05 | 0.0005 | zinc finger, matrin-type 1                                                               |
| ZMYND12        | -3.04 | -1.37 | 0.23  | 1.06E-05 | 0.0002 | zinc finger, MYND-type containing 12                                                     |

|                   |       |       |       |          |        |                                                                                     |
|-------------------|-------|-------|-------|----------|--------|-------------------------------------------------------------------------------------|
| ZNF157            | -3.01 | -1.31 | 0.28  | 1.19E-05 | 0.0002 | zinc finger protein 157                                                             |
| ZNF174            | -3.15 | -1.44 | 0.21  | 3.56E-05 | 0.0003 | zinc finger protein 174                                                             |
| ZNF175            | -3.07 | -1.34 | 0.28  | 0.0002   | 0.0010 | zinc finger protein 175                                                             |
| ZNF182; ZNF630    | -3.04 | -1.31 | 0.29  | 4.27E-06 | 0.0002 | zinc finger protein 182; zinc finger protein 630                                    |
| ZNF212            | -3.01 | -1.31 | 0.28  | 0.0001   | 0.0007 | zinc finger protein 212                                                             |
| ZNF217            | 3.52  | 0.43  | -1.38 | 2.72E-06 | 0.0002 | zinc finger protein 217                                                             |
| ZNF227            | 3.46  | 0.32  | -1.47 | 2.27E-05 | 0.0002 | zinc finger protein 227                                                             |
| ZNF23             | -3.2  | -1.31 | 0.36  | 8.45E-06 | 0.0002 | zinc finger protein 23                                                              |
| ZNF250; COMMD5    | -3.11 | -1.31 | 0.32  | 2.22E-05 | 0.0002 | zinc finger protein 250; COMM domain containing 5                                   |
| ZNF256            | 3.56  | 0.38  | -1.46 | 1.21E-05 | 0.0002 | zinc finger protein 256                                                             |
| ZNF29P            | 3.67  | 0.43  | -1.44 | 1.08E-05 | 0.0002 | zinc finger protein 29, pseudogene                                                  |
| ZNF3              | 3.25  | 0.31  | -1.39 | 9.25E-06 | 0.0002 | zinc finger protein 3                                                               |
| ZNF317            | 3.02  | 0.39  | -1.2  | 0.0003   | 0.0014 | zinc finger protein 317                                                             |
| ZNF322            | -3.06 | -1.34 | 0.27  | 1.98E-05 | 0.0002 | zinc finger protein 322                                                             |
| ZNF34             | -3.14 | -1.35 | 0.3   | 7.73E-06 | 0.0002 | zinc finger protein 34                                                              |
| ZNF341            | -3.01 | -1.31 | 0.28  | 5.61E-05 | 0.0004 | zinc finger protein 341                                                             |
| ZNF345            | 3.3   | 0.32  | -1.4  | 1.01E-05 | 0.0002 | zinc finger protein 345                                                             |
| ZNF37BP           | -3.13 | -1.4  | 0.25  | 0.0001   | 0.0006 | zinc finger protein 37B, pseudogene                                                 |
| ZNF408            | -3.11 | -1.31 | 0.32  | 0.0001   | 0.0005 | zinc finger protein 408                                                             |
| ZNF410            | -3.15 | -1.38 | 0.27  | 9.84E-06 | 0.0002 | zinc finger protein 410                                                             |
| ZNF417            | -3.22 | -1.39 | 0.3   | 0.0002   | 0.0009 | zinc finger protein 417                                                             |
| ZNF439            | -3.43 | -1.41 | 0.36  | 4.25E-05 | 0.0003 | zinc finger protein 439                                                             |
| ZNF460            | -3.18 | -1.41 | 0.26  | 5.67E-05 | 0.0004 | zinc finger protein 460                                                             |
| ZNF516            | -3.26 | -1.38 | 0.32  | 2.58E-05 | 0.0003 | zinc finger protein 516                                                             |
| ZNF534            | -3.15 | -1.3  | 0.36  | 3.67E-06 | 0.0002 | zinc finger protein 534                                                             |
| ZNF543            | 3.35  | 0.32  | -1.42 | 7.07E-06 | 0.0002 | zinc finger protein 543                                                             |
| ZNF551            | -3.04 | -1.28 | 0.32  | 5.12E-05 | 0.0004 | zinc finger protein 551                                                             |
| ZNF563            | -3.26 | -1.38 | 0.32  | 8.51E-06 | 0.0002 | zinc finger protein 563                                                             |
| ZNF564            | 3.03  | 0.4   | -1.2  | 6.43E-06 | 0.0002 | zinc finger protein 564                                                             |
| ZNF566            | -3.16 | -1.38 | 0.28  | 0.0001   | 0.0006 | zinc finger protein 566                                                             |
| 580; ZNF581; CCDC | -3.05 | -1.36 | 0.24  | 3.41E-05 | 0.0003 | zinc finger protein 580; zinc finger protein 581; coiled-coil domain containing 106 |
| ZNF582            | -3.31 | -1.38 | 0.34  | 6.15E-06 | 0.0002 | zinc finger protein 582                                                             |
| ZNF586            | -3.19 | -1.37 | 0.3   | 1.56E-05 | 0.0002 | zinc finger protein 586                                                             |
| ZNF587; UBE2CP5   | 3.15  | 0.23  | -1.43 | 1.11E-05 | 0.0002 | zinc finger protein 587; ubiquitin conjugating enzyme E2C pseudogene 5              |
| ZNF592            | 3.1   | 0.25  | -1.38 | 3.77E-05 | 0.0003 | zinc finger protein 592                                                             |
| ZNF624            | -3.45 | -1.42 | 0.36  | 5.47E-05 | 0.0004 | zinc finger protein 624                                                             |
| IF625-ZNF20; ZNF6 | 3.02  | 0.17  | -1.43 | 4.38E-06 | 0.0002 | ZNF625-ZNF20 readthrough (NMD candidate); zinc finger protein 625                   |
| ZNF668            | 3.34  | 0.36  | -1.38 | 1.06E-05 | 0.0002 | zinc finger protein 668                                                             |

|                 |       |       |       |          |        |                                                                                 |
|-----------------|-------|-------|-------|----------|--------|---------------------------------------------------------------------------------|
| ZNF671          | 3.19  | 0.47  | -1.2  | 2.13E-05 | 0.0002 | zinc finger protein 671                                                         |
| ZNF697          | -3.26 | -1.38 | 0.32  | 3.78E-06 | 0.0002 | zinc finger protein 697                                                         |
| ZNF71           | 3.67  | 0.43  | -1.44 | 9.62E-06 | 0.0002 | zinc finger protein 71                                                          |
| ZNF716          | 3.84  | 0.52  | -1.43 | 1.34E-05 | 0.0002 | zinc finger protein 716                                                         |
| ZNF720          | 3.19  | 0.47  | -1.2  | 1.66E-05 | 0.0002 | zinc finger protein 720                                                         |
| ZNF721; ABCA11P | -3.16 | -1.38 | 0.28  | 8.64E-05 | 0.0005 | zinc finger protein 721; ATP binding cassette subfamily A member 11, pseudogene |
| ZNF750          | 3.2   | 0.28  | -1.4  | 7.83E-06 | 0.0002 | zinc finger protein 750                                                         |
| ZNF764          | 3.03  | 0.4   | -1.2  | 1.19E-05 | 0.0002 | zinc finger protein 764                                                         |
| ZNF770          | -3.19 | -1.4  | 0.28  | 5.12E-06 | 0.0002 | zinc finger protein 770                                                         |
| ZNF774          | -3.03 | -1.41 | 0.19  | 0.0001   | 0.0006 | zinc finger protein 774                                                         |
| ZNF787          | -3.22 | -1.28 | 0.4   | 9.60E-06 | 0.0002 | zinc finger protein 787                                                         |
| ZNF793          | -3.22 | -1.36 | 0.32  | 5.16E-05 | 0.0004 | zinc finger protein 793                                                         |
| ZNF799          | 3.26  | 0.32  | -1.38 | 3.18E-05 | 0.0003 | zinc finger protein 799                                                         |
| ZNF80           | 3.32  | 0.35  | -1.38 | 5.76E-05 | 0.0004 | zinc finger protein 80                                                          |
| ZNF804B         | -3.05 | -1.28 | 0.33  | 1.50E-05 | 0.0002 | zinc finger protein 804B                                                        |
| ZNF85           | -3.12 | -1.36 | 0.28  | 4.27E-05 | 0.0003 | zinc finger protein 85                                                          |
| ZNF852          | 3.44  | 0.38  | -1.4  | 1.57E-05 | 0.0002 | zinc finger protein 852                                                         |
| ZNF862          | -3.04 | -1.28 | 0.32  | 0.0002   | 0.0008 | zinc finger protein 862                                                         |
| ZNF90           | 3.33  | 0.34  | -1.4  | 1.94E-05 | 0.0002 | zinc finger protein 90                                                          |
| ZNHIT6          | -3.2  | -1.42 | 0.26  | 3.39E-05 | 0.0003 | zinc finger, HIT-type containing 6                                              |
| ZSCAN5B         | 3.34  | 0.36  | -1.38 | 3.00E-06 | 0.0002 | zinc finger and SCAN domain containing 5B                                       |
| ZSWIM4          | -3.02 | -1.36 | 0.23  | 1.34E-05 | 0.0002 | zinc finger, SWIM-type containing 4                                             |
| ZW10            | 3.26  | 0.32  | -1.38 | 2.68E-06 | 0.0002 | zw10 kinetochore protein                                                        |
| ZWINT           | -3.04 | -1.28 | 0.32  | 2.03E-05 | 0.0002 | ZW10 interacting kinetochore protein                                            |

Table. S2. Enrichment results of top ten Process Networks regulated by colostrum exosome capsulated oligosaccharides.

|    | Process Networks                                                     | Total | pValue    | Min FDR   | p-value   | FDR       | In Data | Network Objects from<br>Active Data                                                        |
|----|----------------------------------------------------------------------|-------|-----------|-----------|-----------|-----------|---------|--------------------------------------------------------------------------------------------|
| 1  | <a href="#">Inflammation_TREM1 signaling</a>                         | 145   | 6.714E-05 | 9.266E-03 | 6.714E-05 | 9.266E-03 | 9       | IRAK2, IRAK1/2, tBid, I-kB, MEK1/2, ITGB1, MEK2(MAP2K2), jBid, Bid                         |
| 2  | <a href="#">Inflammation_NK cell cytotoxicity</a>                    | 164   | 1.731E-04 | 1.195E-02 | 1.731E-04 | 1.195E-02 | 9       | FADD, NFKBIE, Perforin, I-kB, MEK1/2, KIR3DL1, MEK2(MAP2K2), KIR3DL3, Bid                  |
| 3  | <a href="#">Inflammation_IL-4 signaling</a>                          | 115   | 5.082E-04 | 2.338E-02 | 5.082E-04 | 2.338E-02 | 7       | tBid, p70 S6 kinase1, I-kB, MEK1/2, MEK2(MAP2K2), jBid, Bid                                |
| 4  | <a href="#">Inflammation_Neutrophil activation</a>                   | 215   | 1.253E-03 | 3.958E-02 | 1.253E-03 | 3.958E-02 | 9       | Rac2, FADD, tBid, NFKBIE, I-kB, MEK1/2, MEK2(MAP2K2), Bid, ICAM4                           |
| 5  | <a href="#">Immune response_BCR pathway</a>                          | 137   | 1.434E-03 | 3.958E-02 | 1.434E-03 | 3.958E-02 | 7       | Kappa chain (Ig light chain), p70 S6 kinase1, NFKBIE, Profilin, I-kB, MEK1/2, MEK2(MAP2K2) |
| 6  | <a href="#">Apoptosis_Apoptosis stimulation by external signals</a>  | 144   | 1.911E-03 | 4.395E-02 | 1.911E-03 | 4.395E-02 | 7       | FADD, tBid, TWEAK(TNFSF12), I-kB, MEK2(MAP2K2), jBid, Bid                                  |
| 7  | <a href="#">Inflammation_Amphoterin signaling</a>                    | 118   | 3.236E-03 | 5.821E-02 | 3.236E-03 | 5.821E-02 | 6       | IRAK2, IRAK1/2, NFKBIE, I-kB, MEK1/2, MEK2(MAP2K2)                                         |
| 8  | <a href="#">Inflammation_IL-6 signaling</a>                          | 119   | 3.374E-03 | 5.821E-02 | 3.374E-03 | 5.821E-02 | 6       | NFKBIE, AGP1 (ORM1), I-kB, MEK1/2, HDL proteins, MEK2(MAP2K2)                              |
| 9  | <a href="#">Cell adhesion_Integrin-mediated cell-matrix adhesion</a> | 214   | 4.703E-03 | 7.212E-02 | 4.703E-03 | 7.212E-02 | 8       | Profilin I, RASGRF1, Tubulin alpha, Profilin, MEK1/2, ITGB1, MEK2(MAP2K2), RhoGDI alpha    |
| 10 | <a href="#">Immune response_Phagocytosis</a>                         | 222   | 5.853E-03 | 7.343E-02 | 5.853E-03 | 7.343E-02 | 8       | ILT2, Profilin I, APOA2, NFKBIE, Profilin, I-kB, ITGB1, HDL proteins                       |

Table. S3. Enrichment results of top ten Pathway Maps regulated by colostrum exosome capsulated oligosaccharides.

| #  | Maps                                                                                      | Total | pValue    | Min FDR   | p-value   | FDR       | In Data | Network Objects from<br>Active Data                |
|----|-------------------------------------------------------------------------------------------|-------|-----------|-----------|-----------|-----------|---------|----------------------------------------------------|
| 1  | <a href="#">Apoptosis and survival_TNFR1 signaling pathway</a>                            | 43    | 2.386E-05 | 1.117E-02 | 2.386E-05 | 1.117E-02 | 5       | FADD, tBid, I-kB, jBid, Bid                        |
| 2  | <a href="#">IGF family signaling in colorectal cancer</a>                                 | 60    | 1.215E-04 | 1.924E-02 | 1.215E-04 | 1.924E-02 | 5       | COX-2 (PTGS2), p70 S6 kinase1, I-kB, MEK1/2, MAFG  |
| 3  | <a href="#">Apoptosis and survival_Granzyme B signaling</a>                               | 32    | 1.233E-04 | 1.924E-02 | 1.233E-04 | 1.924E-02 | 4       | tBid, Tubulin alpha, Perforin, Bid                 |
| 4  | <a href="#">Cytoskeleton remodeling_Substance P mediated membrane blebbing</a>            | 16    | 2.698E-04 | 2.815E-02 | 2.698E-04 | 2.815E-02 | 3       | Tubulin alpha, Dynamin-1, Dynamin                  |
| 5  | <a href="#">Apoptosis and survival_Apoptotic TNF-family pathways</a>                      | 42    | 3.609E-04 | 2.815E-02 | 3.609E-04 | 2.815E-02 | 4       | FADD, tBid, TWEAK(TNFSF12), Bid                    |
| 6  | <a href="#">Apoptosis and survival_Anti-apoptotic TNFs/NF-kB/Bcl-2 pathway</a>            | 42    | 3.609E-04 | 2.815E-02 | 3.609E-04 | 2.815E-02 | 4       | IRAK1/2, Sequestosome 1(p62), TWEAK(TNFSF12), I-kB |
| 7  | <a href="#">Expression targets of Tissue factor signaling in cancer</a>                   | 22    | 7.163E-04 | 4.789E-02 | 7.163E-04 | 4.789E-02 | 3       | NFKBIE, ITGB1, CTGF                                |
| 8  | <a href="#">Immune response_TLR2 and TLR4 signaling pathways</a>                          | 57    | 1.161E-03 | 6.793E-02 | 1.161E-03 | 6.793E-02 | 4       | IRAK2, COX-2 (PTGS2), I-kB, MEK1/2                 |
| 9  | <a href="#">Glucocorticoid-induced elevation of intraocular pressure as glaucoma risk</a> | 62    | 1.590E-03 | 8.269E-02 | 1.590E-03 | 8.269E-02 | 4       | COX-2 (PTGS2), SENP1, ITGB1, RhoGDI alpha          |
| 10 | <a href="#">Apoptosis and survival_Role of IAP-proteins in apoptosis</a>                  | 31    | 1.983E-03 | 9.283E-02 | 1.983E-03 | 9.283E-02 | 3       | FADD, tBid, Bid                                    |
